# Supplementary material for: Transcriptomic and Metabolomic Analyses Providing Insights into the Coloring Mechanism of Docynia delavayi
Source: MDPI journal article supplement (doi:10.3390/foods11182899), 2022-09-18
Supplement: s1 [file s1]

Transcriptomic and metabolomic analyses providing insights into the Coloring Mechanism of *Docynia delavayi*

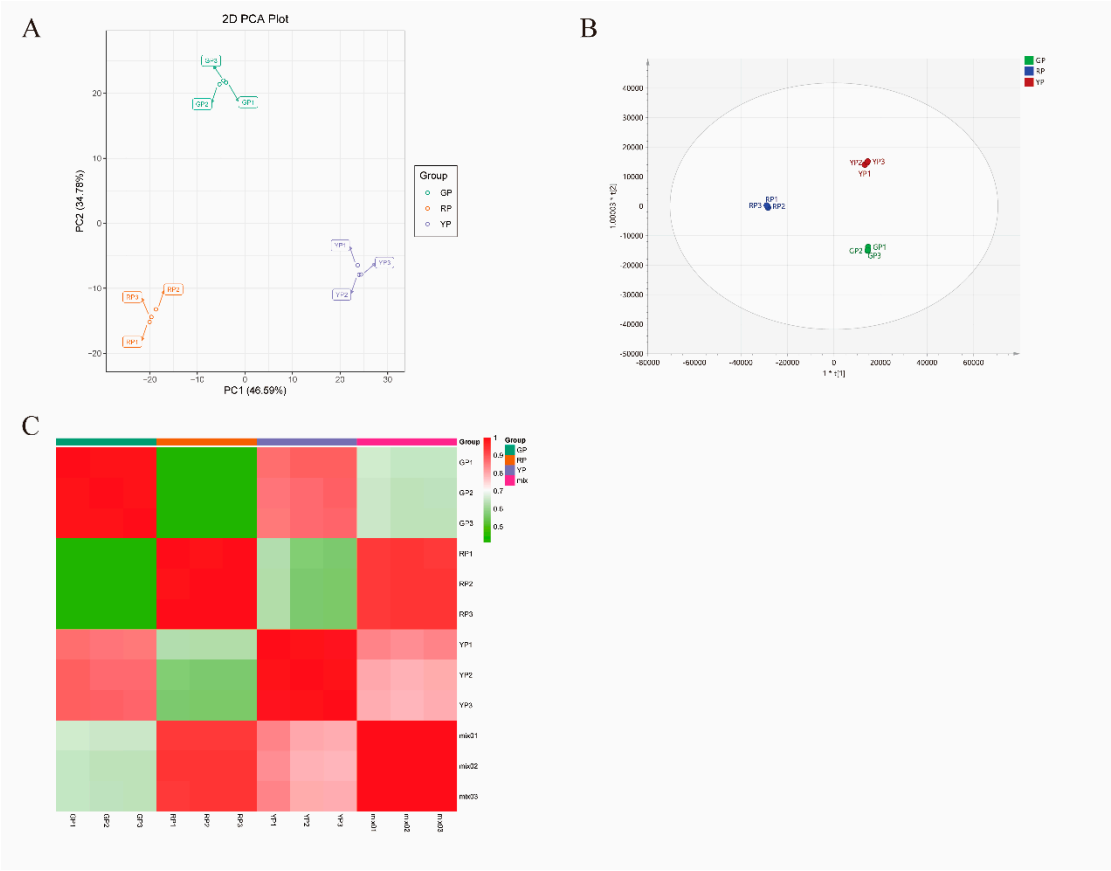

**Figure S1** Metabolite samples (GP, YP, and RP) quality assurance. (A) Principal component analysis (PCA) of metabolite data. (B) OPLS-DA score plot. (C) Heat map of Pearson's correlation coefficient for metabolite samples.



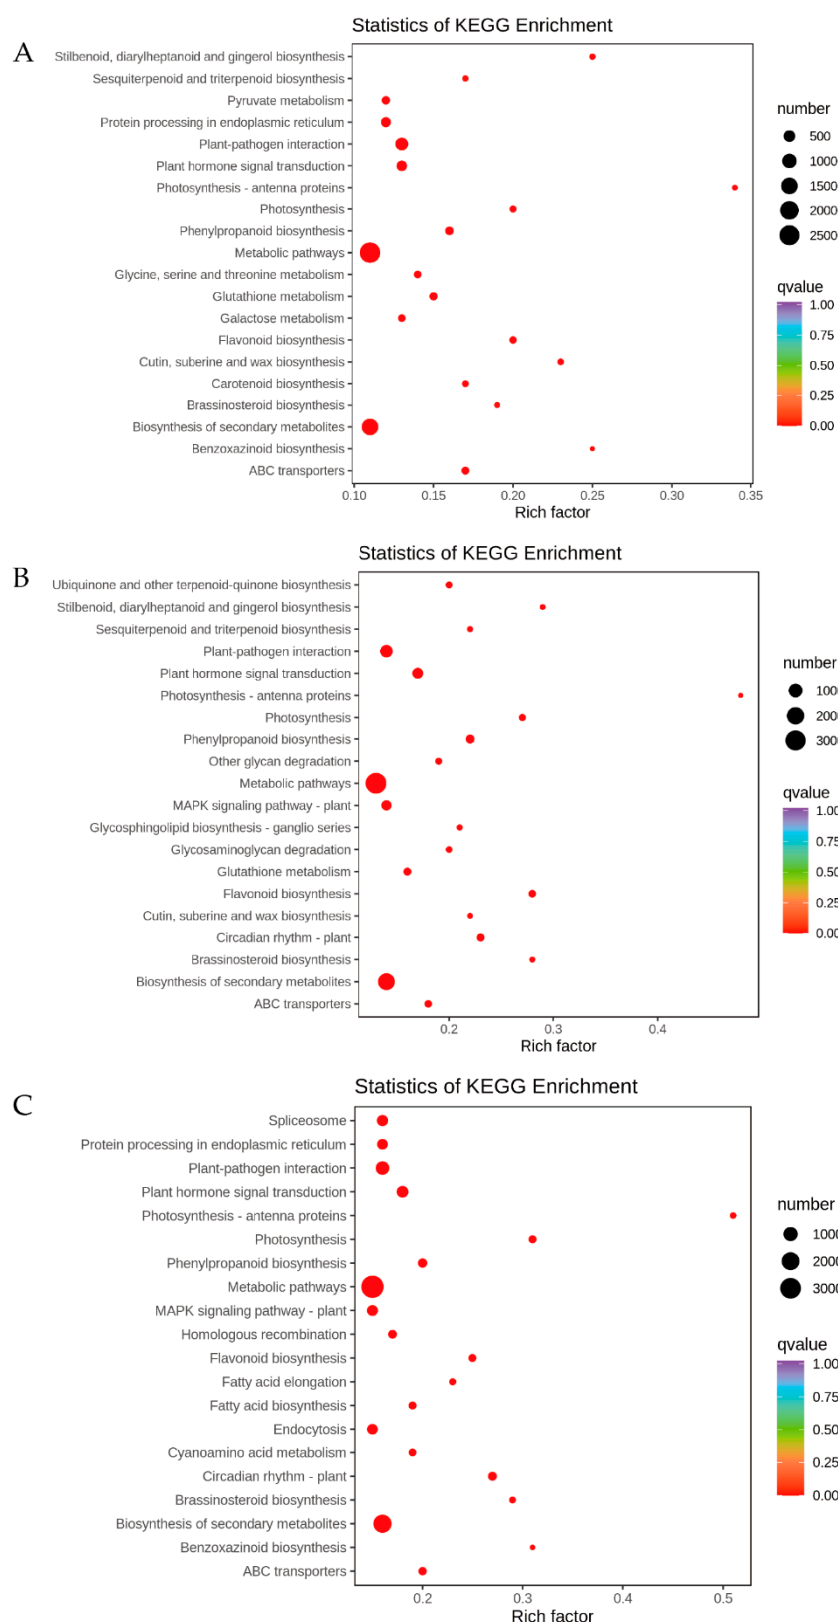

**Figure S3** DEGs analyzed by KEGG enrichment analysis (A) GP vs. RP, (B) YP vs. GP, and (C) YP vs. RP.
