# Supplementary material for: Transcriptomic and Metabolomic Analyses Providing Insights into the Coloring Mechanism of Docynia delavayi
Source: Foods. 2022 Sep 18;11(18):2899. doi: 10.3390/foods11182899 (PMC9498648; doi:10.3390/foods11182899)
Supplement: Supplementary file 1 [file foods-11-02899-s001.zip]

Archive with 7 entries (7 files):
- Figures supplement.pdf
- Table S1.xlsx
- Table S2.xlsx
- Table S3.xlsx
- Table S4.xlsx
- Table S5.xlsx
- Table S6.xlsx
