# Supplementary material for: Transcriptomic and Metabolomic Analyses Providing Insights into the Coloring Mechanism of Docynia delavayi
Source: Foods. 2022 Sep 18;11(18):2899. doi: 10.3390/foods11182899 (PMC9498648; doi:10.3390/foods11182899)
Supplement: Supplementary file 1 [file foods-11-02899-s001.zip › Table S1.xlsx]

## Sheet: Sheet1
Table S1 qPCR Primer Information
Gene	ID		sequence（5'-3'）	product size
PAL	Cluster-17563.46326	F	TTGCGCTTTGTCAGTCCATC	138bp
		R	CACAGAACCTTGAGGGGTGA
C4H	Cluster-17563.80348	F	GAGCACTGGCGTAAAATGCG	125bp
		R	GGGTGCTTTTTCACGTCCTC
4CL	Cluster-17563.57744	F	TCAGGCATTGTTGGGTCAGG	171bp
		R	TAGCCGAGTGACAGACCAGT
CHS	Cluster-17563.68278	F	CCATCTCCGTGAAGTAGGGC	141bp
		R	TGTGCAATCCAGAAGAGCGA
CHI	Cluster-17563.45851	F	ATTGGGGTTTACTTGGACCCT	126bp
		R	GAATTTCTCAGCAGGGGCAGA
F3H	Cluster-17563.73156	F	CTGTGCAAGATTGGCGTGAA	128bp
		R	CATCAGCTCGTCGCTGTACT
F3'H	Cluster-17563.40579	F	CAGTGAACTTGGCGCAGCTA	122bp
		R	CTTGAACTCATCCGCCTTTGG
DFR	Cluster-17563.71567	F	TTCACTTGGACGACCTCTGC	162bp
		R	TGCCCTTGAACTTTGTGGGT
LDOX/ANS	Cluster-17563.73320	F	ATTACATTGAGGCAACCGCC	103bp
		R	AGCCTCCCTTCATCCAATCC
UGTF4	Cluster-17563.86860	F	TAGCATCCCCGCCTACATCA	145bp
		R	GTGGGTATCGTTATGGCGGA
GST	Cluster-17563.100508	F	CCGTTTGGGCAAGTTCCAGT	181bp
		R	GGTCGTTGAAGTTGTGGCCT
2GST	Cluster-17563.73499	F	ACGGGCCATATTTTCTGGGT	132bp
		R	ATGCTGCTAGTTTGGGCCTC
bHLH	Cluster-17563.18733	F	ACCAGGGTGCAACAAGATCA	195bp
		R	CCCATCGTGGGAAAATTGGC
MYB	Cluster-17563.79687	F	GAAACTGGAGGGGAGCGATG	142bp
		R	AGAAACTTGACGTGGGCACT
2MYB	Cluster-17563.131204	F	AGTGGCCTGCTAGATGCTTT	112bp
		R	CAACCACATCGCCAGGAGTA
Actin		F	TGACCGAATGAGCAAGGAAATTACT
		R	TACTCAGCTTTGGCAATCCACATC
