# Supplementary material for: Transcriptomic and Metabolomic Analyses Providing Insights into the Coloring Mechanism of Docynia delavayi
Source: Foods. 2022 Sep 18;11(18):2899. doi: 10.3390/foods11182899 (PMC9498648; doi:10.3390/foods11182899)
Supplement: Supplementary file 1 [file foods-11-02899-s001.zip › Table S2.xlsx]

## Sheet: Sheet1
Table S2 Qualitative and quantitative metabolite analysis of Docynia delavayi
Index	Q1 (Da)	Q3 (Da)	Molecular Weight (Da)	Formula	Ionization model	Compounds	Class	CAS	Level	GP1	GP2	GP3	RP1	RP2	RP3	YP1	YP2	YP3
mws0217	76.04	29.99	75.032	C2H5NO2	[M+H]+	L-Glycine	Amino acids and derivatives	56-40-6	B	8207.1	9081.3	7882.5	9467.2	5531.1	6849.2	10953	8338.3	14144
pme3017	104.07	58	103.063	C4H9NO2	[M+H]+	2-Aminoisobutyric acid*	Amino acids and derivatives	62-57-7	A	113980	99363	95453	205440	190240	180920	92275	73682	79808
pme3033	104.07	86	103.063	C4H9NO2	[M+H]+	N,N-Dimethylglycine	Amino acids and derivatives	1118-68-9	A	83431	81233	77961	78087	72488	72810	22398	23731	27968
pme0010	106	60	105.043	C3H7NO3	[M+H]+	L-Serine	Amino acids and derivatives	56-45-1	A	1274300	1568800	1227300	1523800	1346000	1589200	1235000	945120	1143800
pme2122	112.09	95	111.08	C5H9N3	[M+H]+	Histamine	Amino acids and derivatives	51-45-6	B	48204	49023	46185	76428	57508	66546	60413	55769	53455
pme0006	116.07	70.1	115.063	C5H9NO2	[M+H]+	L-Proline	Amino acids and derivatives	147-85-3	A	1560800	1493000	1309200	2394000	2368400	2048900	1621700	1487100	1557000
mws0256	118.09	72.1	117.079	C5H11NO2	[M+H]+	L-Valine	Amino acids and derivatives	72-18-4	A	5058900	4893100	4732300	5845100	6026100	5882400	3745600	3593800	3232900
mws0230	120.07	74	119.058	C4H9NO3	[M+H]+	L-Threonine*	Amino acids and derivatives	72-19-5	A	754470	877860	718350	1221100	1029800	1223600	658080	580900	593540
mws0263	128.04	82.03	129.043	C5H7NO3	[M-H]-	5-Oxo-L-Proline	Amino acids and derivatives	98-79-3	B	3358.4	3747.9	3302	2179.4	4224.3	2451.4	8804.3	7994.5	6327.8
Rfmb319	130.09	84.08	129.079	C6H11NO2	[M+H]+	Pipecolic acid	Amino acids and derivatives	4043-87-2	B	228970	177240	200860	454530	328590	368700	191120	178370	201950
ML10181668	130.09	84.08	129.079	C6H11NO2	[M+H]+	Cycloleucine	Amino acids and derivatives	52-52-8	B	2255800	2057900	1806400	1891400	1613500	1827300	918440	799680	939940
mws0712	130.05	86	131.058	C5H9NO3	[M-H]-	N-Propionylglycine	Amino acids and derivatives	21709-90-0	B	106590	107690	116590	88073	92535	83460	91486	80361	86569
mws0216	132.07	86	131.058	C5H9NO3	[M+H]+	Trans-4-Hydroxy-L-proline	Amino acids and derivatives	51-35-4	A	98443	88435	79249	102590	88437	81111	45051	49769	38300
mws0227	132.1	86.2	131.095	C6H13NO2	[M+H]+	L-Leucine*	Amino acids and derivatives	61-90-5	A	1733400	1731700	1897700	2947000	3120100	3015800	1787600	1873100	1757700
mws0258	132.1	86	131.095	C6H13NO2	[M+H]+	L-Isoleucine*	Amino acids and derivatives	73-32-5	A	1742500	1627000	1890200	2832200	3026800	2844200	1713200	1739800	1484300
mws1587	132.1	86	131.095	C6H13NO2	[M+H]+	L-Norleucine*	Amino acids and derivatives	327-57-1	A	978360	979650	1008200	1781000	2061800	1970800	1446800	1375900	1429200
mws0001	133.06	74	132.054	C4H8N2O3	[M+H]+	L-Asparagine	Amino acids and derivatives	70-47-3	A	2073000	2565000	1685200	2290000	1889900	2174000	194880	136160	150370
pme2527	133	116	132.09	C5H12N2O2	[M+H]+	L-Ornithine	Amino acids and derivatives	70-26-8	A	26070	19834	26326	35876	35075	33959	96621	111130	100180
mws0219	132.03	88	133.038	C4H7NO4	[M-H]-	L-Aspartic Acid	Amino acids and derivatives	56-84-8	A	1218500	1265600	1078300	1018100	1210300	1187000	627100	579330	600060
pme1002	138.09	103	137.084	C8H11NO	[M+H]+	L-Tyramine	Amino acids and derivatives	51-67-2	B	5455.7	4396.5	7688.5	21929	16228	19083	3793	2872.4	3048.3
Rfmb320	144.1	84.08	143.095	C7H13NO2	[M+H]+	1-Methylpiperidine-2-carboxylic acid	Amino acids and derivatives	7730-87-2	B	71829	75351	68343	172240	194300	184570	204830	186020	176190
pme0193	147.08	84	146.069	C5H10N2O3	[M+H]+	L-Glutamine	Amino acids and derivatives	56-85-9	A	255600	251810	288280	425380	394280	395620	396340	401140	365280
pme0026	147.11	84	146.106	C6H14N2O2	[M+H]+	L-Lysine	Amino acids and derivatives	56-87-1	A	247240	239620	262260	382500	386410	404830	350670	359610	379450
mws1050	148.06	88	147.053	C5H9NO4	[M+H]+	O-Acetylserine	Amino acids and derivatives	5147-00-2	A	11734000	11505000	8664700	11505000	11127000	9655600	4378300	3621100	4422800
pme0014	148.06	84	147.053	C5H9NO4	[M+H]+	L-Glutamic acid	Amino acids and derivatives	56-86-0	A	1444000	1754300	1451400	1620600	1355000	1346300	810280	800990	802180
Zmzn000113	146.05	102.06	147.053	C5H9NO4	[M-H]-	L-threo-3-Methylaspartate	Amino acids and derivatives	6061-13-8	A	416340	435970	408860	446590	421710	460520	189570	208910	210230
pme1210	150.06	61	149.051	C5H11NO2S	[M+H]+	L-Methionine	Amino acids and derivatives	63-68-3	A	140330	131910	103550	85113	103750	83911	106650	87657	89882
mws0254	156.08	110	155.069	C6H9N3O2	[M+H]+	L-Histidine	Amino acids and derivatives	71-00-1	A	46062	45709	50123	91151	87370	90066	138350	152310	127680
pme3382	160.06	98	161.069	C6H11NO4	[M-H]-	N-Acetyl-L-threonine	Amino acids and derivatives	17093-74-2	B	53127	48490	43615	55234	55726	47277	31595	27856	35744
pme2914	161.05	99	162.053	C6H10O5	[M-H]-	3-Hydroxy-3-methylpentane-1,5-dioic acid	Amino acids and derivatives	503-49-1	A	1459500	1485600	1525400	928440	992970	913180	1316200	1351500	1408700
Lmbp000123	164.07	56.05	163.067	C6H13NO2S	[M+H]+	L-Homomethionine	Amino acids and derivatives	25148-30-5	B	100290	91183	118090	102360	82691	97916	90463	90069	97222
pme2617	166.05	102	165.046	C5H11NO3S	[M+H]+	L-Methionine Sulfoxide	Amino acids and derivatives	3226-65-1	A	9759500	10025000	9744800	9845000	10582000	10267000	7629300	7988200	8029900
pme0021	166.09	120.08	165.07	C9H11NO2	[M+H]+	L-Phenylalanine	Amino acids and derivatives	63-91-2	A	29418000	29914000	29712000	36524000	37499000	36490000	14158000	13877000	13499000
pme0181	170.09	124	169.085	C7H11N3O2	[M+H]+	3-Methyl-L-Histidine	Amino acids and derivatives	368-16-1	A	36416	70523	41546	34125	30208	38840	16792	13905	15185
mws0260	175.12	116	174.112	C6H14N4O2	[M+H]+	L-Arginine	Amino acids and derivatives	74-79-3	A	71771	80545	94062	193020	171110	150720	83737	53468	49769
pme2559	174.04	88	175.048	C6H9NO5	[M-H]-	N-Acetyl-L-Aspartic Acid	Amino acids and derivatives	997-55-7	A	9788	8283.4	7336.8	15687	12815	15887	21578	15966	30572
pme0008	176.1	113	175.096	C6H13N3O3	[M+H]+	L-Citrulline	Amino acids and derivatives	372-75-8	B	36742	38409	23136	35496	43137	31192	33718	36868	28583
Lmbp001216	178.09	84.08	177.082	C7H15NO2S	[M+H]+	L-Dihomomethionine	Amino acids and derivatives	34022-36-1	B	4530.4	5416.5	3090.3	7476.9	5761.1	5748.5	12302	9124.3	12209
mws0250	182.08	136.1	181.074	C9H11NO3	[M+H]+	L-Tyrosine	Amino acids and derivatives	60-18-4	A	884270	923510	883410	1451800	1477900	1409500	1493100	1481200	1621900
pme2602	184	97	185.009	C3H8NO6P	[M-H]-	O-Phospho-L-serine	Amino acids and derivatives	407-41-0	B	11264	10731	5152.2	9407.6	12705	9764.3	11454	16822	13146
pme0137	187.07	125	188.08	C7H12N2O4	[M-H]-	N-Acetyl-L-Glutamine	Amino acids and derivatives	2490-97-3	A	884290	885570	959220	633430	773190	742320	1623700	1820600	1781800
pme0122	189.12	126	188.116	C8H16N2O3	[M+H]+	N6-Acetyl-L-lysine	Amino acids and derivatives	692-04-6	A	11105	12464	9036.7	19929	13397	14789	10339	10545	6329.4
mws5041	189.12	86.1	188.116	C8H16N2O3	[M+H]+	L-Glycyl-L-isoleucine*	Amino acids and derivatives	19461-38-2	A	12534	15990	13379	28656	34577	28430	18306	17948	17494
mws0736	189.12	86	188.116	C8H16N2O3	[M+H]+	N-Glycyl-L-leucine*	Amino acids and derivatives	869-19-2	A	20029	26115	20377	41419	47954	41892	26808	25512	22146
Zmjp000182	189.13	70.07	188.127	C7H16N4O2	[M+H]+	N-Monomethyl-L-arginine	Amino acids and derivatives	17035-90-4	B	12004	11325	13469	36142	43545	44196	10934	5941.7	8262.4
pme0075	188.06	128	189.064	C7H11NO5	[M-H]-	N-Acetyl-L-glutamic acid	Amino acids and derivatives	1188-37-0	B	39716	48399	33708	38601	42299	35982	28525	23958	26890
pme0278	191.1	128	190.095	C7H14N2O4	[M+H]+	2,6-Diaminooimelic acid	Amino acids and derivatives	583-93-7	B	9933.2	8293	9568	36808	37007	42253	13512	15335	14248
mws5037	203.14	86.1	202.132	C9H18N2O3	[M+H]+	L-Alanyl-L-leucine	Amino acids and derivatives	3303-34-2	A	26603	24963	28720	20162	25090	27302	16625	16262	20326
NK10251888	203.15	70.07	202.143	C8H18N4O2	[M+H]+	NG,NG-Dimethyl-L-arginine	Amino acids and derivatives	30315-93-6	B	6669.5	9009.5	3846.9	5732.7	1590.4	10526	5026.7	1788.1	4319.2
mws0282	203.08	116.05	204.09	C11H12N2O2	[M-H]-	L-Tryptophan	Amino acids and derivatives	73-22-3	A	269990	273510	247440	382960	386050	408990	172540	165540	174350
Zmgn002106	206.08	58.03	207.09	C11H13NO3	[M-H]-	N-Acetyl-L-phenylalanine	Amino acids and derivatives	2018-61-3	B	43161	42726	67270	78672	69157	66644	59922	46513	50913
pme0109	212.09	166	211.084	C10H13NO4	[M+H]+	Methyldopa	Amino acids and derivatives	555-30-6	B	30867	39162	37873	29750	28065	35644	28205	26177	41109
pme0170	217.13	158	216.122	C8H16N4O3	[M+H]+	N-Acetyl-L-Arginine	Amino acids and derivatives	155-84-0	A	21477	26665	12451	28125	31534	30716	11189	10444	20671
pme2566	217.08	199	218.09	C8H14N2O5	[M-H]-	5-L-Glutamyl-L-amino acid	Amino acids and derivatives	5875-41-2	B	17943	26059	19432	15389	19607	16586	15959	25990	25705
Lmrj001698	219.13	60.04	218.127	C9H18N2O4	[M+H]+	L-Seryl-L-Isoleucine	Amino acids and derivatives	91086-51-0	A	4297	5086.2	4488.8	7461.3	8570.5	8019.6	8525.7	8622.8	8485.5
mws5042	223.11	120.09	222.1	C11H14N2O3	[M+H]+	L-Glycyl-L-phenylalanine	Amino acids and derivatives	721-66-4	A	30202	28763	33811	50996	54960	68655	33909	25260	27473
mws0520	224.09	136	223.084	C11H13NO4	[M+H]+	N-Acetyl-L-tyrosine	Amino acids and derivatives	537-55-3	B	6891.4	2447.5	1824.5	4321.1	3720.2	7728	5302.2	3381.2	2821.5
Lmhp001461	229.15	70.07	229.154	C11H20N2O3	[M+H]+	L-Prolyl-L-Leucine	Amino acids and derivatives	52899-07-7	B	6004.2	3933.2	8250.8	10294	10477	7472	17852	13180	17395
Lmhp001670	231.16	72.08	231.17	C11H22N2O3	[M+H]+	L-Valyl-L-Leucine	Amino acids and derivatives	3989-97-7	B	9236	7486.2	11850	17809	19098	12578	8336.5	11058	13942
mws4176	237.12	120.09	236.116	C12H16N2O3	[M+H]+	L-Alanyl-L-Phenylalanine	Amino acids and derivatives	3061-90-3	B	19118	25680	26227	40174	42728	38724	11218	13584	11089
mws0221	241.03	152	240.024	C6H12N2O4S2	[M+H]+	L-Cystine	Amino acids and derivatives	56-89-3	B	14470	14043	15434	20628	14720	16344	41481	32748	34690
Lmhp002031	245.18	86.1	245.186	C12H24N2O3	[M+H]+	L-Leucyl-L-Leucine	Amino acids and derivatives	3303-31-9	A	14523	10610	9340.8	21325	27760	18885	14504	9887.6	9959.1
pmb2591	245.09	203.2	246.1	C13H14N2O3	[M-H]-	N-Acetyl-L-Tryptophan	Amino acids and derivatives	1218-34-4	A	105760	125030	103550	826550	1108500	831230	823260	1057800	1002100
Lmrj002087	247.13	86.09	246.121	C10H18N2O5	[M+H]+	L-Isoleucyl-L-Aspartate	Amino acids and derivatives	-	B	27169	27085	43580	40182	41106	42814	25442	17815	18831
Lmhp001732	263.13	70.07	263.139	C14H18N2O3	[M+H]+	L-Prolyl-L-Phenylalanine	Amino acids and derivatives	13589-02-1	A	11299	14659	9746.1	25732	30267	34294	9061.6	10644	13499
Lmhp002001	265.15	72.08	264.147	C14H20N2O3	[M+H]+	L-Valyl-L-Phenylalanine	Amino acids and derivatives	3918-92-1	B	3274.6	3840.5	5873.9	10322	10852	7646.4	6815.2	10919	9133.5
pme2890	269.06	136	268.055	C8H16N2O4S2	[M+H]+	L-Homocystine	Amino acids and derivatives	626-72-2	B	7396.4	11188	8405.1	21163	12932	14583	6457.6	12437	15758
pmb0034	277.1	114.7	276.096	C10H16N2O7	[M+H]+	L-α-Glutamyl-L-Glutamic Acid	Amino acids and derivatives	3929-61-1	B	7704.5	7566.3	6549.9	14905	12835	20540	7975.6	7355.1	8152.4
Lmrj002793	277.12	120.08	276.112	C14H16N2O4	[M+H]+	Cyclo(Phe-Glu)	Amino acids and derivatives	-	B	2637	2319.2	3364.1	6655.7	3775	4657.5	15052	10709	14141
pme1712	275	257	276.132	C11H20N2O6	[M-H]-	L-Saccharopine	Amino acids and derivatives	997-68-2	B	68713	59820	80840	57271	51040	58209	51667	47399	59739
mws5035	279.17	120.08	278.163	C15H22N2O3	[M+H]+	L-Leucyl-L-phenylalanine	Amino acids and derivatives	56217-82-4	A	18582	16404	19806	29492	27584	32002	16081	14262	11878
mws0629	281.11	166	280.106	C13H16N2O5	[M+H]+	L-Aspartyl-L-Phenylalanine	Amino acids and derivatives	13433-09-5	A	59407	62180	68016	83168	88817	100040	59080	61348	61944
mws1375	304.15	185.09	303.143	C12H21N3O6	[M+H]+	Nicotianamine	Amino acids and derivatives	34441-14-0	B	108650	87826	94042	190710	136050	141650	90984	126670	104420
pme1086	306.08	143	307.084	C10H17N3O6S	[M-H]-	Glutathione reduced form	Amino acids and derivatives	70-18-8	A	309800	345650	169080	769990	860700	835440	388420	405430	396960
pmb2855	307	145	308.122	C11H20N2O8	[M-H]-	L-Glutamine-O-glycoside	Amino acids and derivatives	-	B	4806.1	8009.7	4447.8	15818	18943	17626	9934.4	7781.3	10992
pmb2857	308.1	146.1	309.106	C11H19NO9	[M-H]-	L-Glutamic acid-O-glycoside	Amino acids and derivatives	-	B	7444	6370.2	3394.7	9043.6	3798.8	6901.8	2372	1686.3	6794.8
mws0582	322.11	130	321.099	C11H19N3O6S	[M+H]+	S-(Methyl)glutathione	Amino acids and derivatives	2922-56-7	A	77091	135270	94539	84104	85225	81173	141250	121270	93344
pme1286	385.13	250	384.122	C14H20N6O5S	[M+H]+	S-(5'-Adenosy)-L-homocysteine	Amino acids and derivatives	979-92-0	B	18678	20012	17839	16055	12150	18871	8164.3	8788.2	8066.9
pme2735	399.2	250	398.137	C15H22N6O5S	[M+H]+	S-Adenosyl-L-methionine	Amino acids and derivatives	29908-03-0	B	110480	130380	192370	194980	151760	103150	105210	58865	77330
pmb1283	448.1	163.5	447.215	C18H33N5O6S	[M+H]+	L-Glutaminyl-L-valyl-L-valyl-L-cysteine	Amino acids and derivatives	-	B	120600	155320	177840	115360	118720	128340	109620	80730	86419
pmb0464	458.1	116.3	457.143	C16H27NO14	[M+H]+	L-Aspartic acid-O-diglucoside	Amino acids and derivatives	-	B	248950	275290	284190	430910	348340	396140	336320	372030	312150
mws4134	611.14	306.08	612.152	C20H32N6O12S2	[M-H]-	Oxiglutatione	Amino acids and derivatives	27025-41-8	B	29594	35571	36626	80658	70864	86333	69054	64919	69515
pmf0096	88.99	70.9	89.995	C2H2O4	[M-H]-	Oxalic acid	Phenolic acids	144-62-7	B	21361	8124.4	6203.5	21955	16352	18000	71240	55774	56448
pmb0069	122	105	121.053	C7H7NO	[M+H]+	Benzamide	Phenolic acids	55-21-0	B	3995.6	5379.3	5553.6	8136.8	8847.4	5384.8	8735.5	9912.2	8330.7
mws0628	121.03	92	122.037	C7H6O2	[M-H]-	4-Hydroxybenzaldehyde	Phenolic acids	123-08-0	B	11629	15919	16195	25817	19972	26437	19521	20482	19511
NK10264324	127.04	81.03	126.032	C6H6O3	[M+H]+	1,3,5-Benzenetriol	Phenolic acids	108-73-6	B	129570	141970	144920	117360	126170	91463	79999	49621	47803
pmp001086	127.04	97	126.032	C6H6O3	[M+H]+	5-Hydroxymethylfurfural	Phenolic acids	67-47-0	A	1775700	2157000	1738300	2142000	2061900	1787700	2855300	2671200	3014800
mws1336	138.06	120	137.048	C7H7NO2	[M+H]+	4-Aminobenzoic acid	Phenolic acids	150-13-0	B	112500	122820	114760	213750	219110	193320	126440	129050	136910
mws0749	137.02	93	138.032	C7H6O3	[M-H]-	4-Hydroxybenzoic acid	Phenolic acids	99-96-7	A	60103	49586	58291	41880	39493	51014	20192	22440	16163
Lmgn001670	137.03	108.02	138.032	C7H6O3	[M-H]-	Salicylic acid	Phenolic acids	69-72-7	B	25586	26129	32222	68056	78526	74341	33527	25867	28348
Hmgn001653	137.02	93.04	138.032	C7H6O3	[M-H]-	Protocatechualdehyde	Phenolic acids	139-85-5	B	29001	71536	32803	102880	91970	91161	71837	59957	73445
pme2828	140	99	139.027	C6H5NO3	[M+H]+	4-Nitrophenol	Phenolic acids	100-02-7	B	17396000	15473000	16832000	13124000	13379000	13684000	17475000	17825000	17611000
pmf0132	141.02	123	140.011	C6H4O4	[M+H]+	Coumalic acid	Phenolic acids	500-05-0	B	9	9	9	9	9	9	55661	82880	60091
pmp001285	149.02	65.04	148.016	C8H4O3	[M+H]+	Phthalic anhydride	Phenolic acids	85-44-9	A	581900	634020	675890	583120	639100	585380	512220	524120	521160
mws0458	151.04	136	152.047	C8H8O3	[M-H]-	Vanillin	Phenolic acids	121-33-5	B	11178	15049	20590	4909.5	2233.5	3364.5	8912.5	8892.5	12269
mws0180	153.02	109.03	154.027	C7H6O4	[M-H]-	2,5-Dihydroxybenzoic acid; Gentisic Acid*	Phenolic acids	490-79-9	B	74753	78914	120800	200980	115910	130320	45988	45068	59011
mws0183	153.02	109.03	154.027	C7H6O4	[M-H]-	3,4-Dihydroxybenzoic acid (Protocatechuic acid)*	Phenolic acids	99-50-3	B	77712	110940	109670	141610	100180	112770	51271	54367	46400
pmf0440	163.08	91.1	162.068	C10H10O2	[M+H]+	4-MethoxycinnaMaldehyde	Phenolic acids	1963-36-6	B	42311	42281	51195	42301	38875	47257	62605	42491	54228
pmb0142	165.1	95.2	164.047	C9H8O3	[M+H]+	Caffeic aldehyde	Phenolic acids	141632-15-7	B	81604	81380	74320	103520	113710	108000	87981	87389	102420
pme3083	164.04	120	165.043	C8H7NO3	[M-H]-	2-(Formylamino)benzoic acid	Phenolic acids	3342-77-6	B	9	9	9	11434	12904	14487	9	9	9
pme0281	165.02	121.03	166.027	C8H6O4	[M-H]-	Terephthalic acid*	Phenolic acids	100-21-0	A	775720	848240	841970	473600	556020	440930	699860	630580	642460
mws0467	165.06	119.05	166.063	C9H10O3	[M-H]-	3-(4-Hydroxyphenyl)-propionic acid	Phenolic acids	501-97-3	B	20684	18564	28409	15634	19482	18662	9	9	9
Lmgp002595	167.07	121.03	166.063	C9H10O3	[M+H]+	Acetovanillone	Phenolic acids	498-02-2	B	61904	55902	53815	141320	149790	153960	47653	55431	44918
pmn001681	165.09	149.06	166.099	C10H14O2	[M-H]-	1-(4-Methoxyphenyl)-1-propanol	Phenolic acids	5349-60-0	B	260750	255110	228840	259810	257930	275080	241240	235840	268100
NK10253223	168.06	94.06	167.058	C8H9NO3	[M+H]+	2-Amino-3-methoxybenzoic acid	Phenolic acids	3177-80-8	B	7041.7	11085	13466	10618	7810.6	8402.1	6409.8	8733	6500.6
Hmbp001276	169.05	65.03	168.042	C8H8O4	[M+H]+	Gallacetophenone	Phenolic acids	528-21-2	B	72893	84313	80214	55722	70135	57126	92077	76800	88732
pme1292	167.1	123.04	168.042	C8H8O4	[M-H]-	Homogentisic acid	Phenolic acids	451-13-8	B	30478	28320	39469	44618	24447	34369	40452	44701	36885
Lmmp003042	169.05	123.04	168.042	C8H8O4	[M+H]+	Protocatechuic Acid Methyl Ester	Phenolic acids	2150-43-8	A	1281700	1316500	1356300	1078700	1122300	1073900	912380	999460	937540
pme2598	167.03	123.04	168.042	C8H8O4	[M-H]-	3,4-Dihydroxybenzeneacetic acid	Phenolic acids	102-32-9	B	25057	19817	29059	19970	14832	23746	26156	32651	26663
mws1195	179.07	147.1	178.063	C10H10O3	[M+H]+	p-Coumaric acid methyl ester	Phenolic acids	3943-97-3	B	164990	172820	157160	87202	92428	102310	28837	27331	20729
mws0009	179.07	91	178.063	C10H10O3	[M+H]+	Coniferaldehyde	Phenolic acids	20649-42-7	B	23188	23310	33678	33401	45188	37774	23024	13153	16914
mws2212	179.03	135.05	180.042	C9H8O4	[M-H]-	Caffeic acid	Phenolic acids	331-39-5	B	58715	41044	73322	70413	74134	76623	33324	36924	30134
mws0093	179.07	146	180.079	C10H12O3	[M-H]-	Coniferyl alcohol	Phenolic acids	458-35-5	B	12037	12444	16062	18480	17852	23700	39432	43556	40906
Hmtn001288	181.05	135.04	182.058	C9H10O4	[M-H]-	Methyl 2,4-dihydroxyphenylacetate	Phenolic acids	67828-42-6	B	13683	13185	13638	9082.4	19728	6586.9	15914	15716	12108
mws1350	181.05	151	182.058	C9H10O4	[M-H]-	Syringaldehyde; 4-Hydroxy-3,5-Dimethoxybenzaldehyde	Phenolic acids	134-96-3	B	106790	108770	173280	20819	13802	11830	121220	97158	77262
Lmrn001951	181.05	135.04	182.058	C9H10O4	[M-H]-	(S)-2-Hydroxy-3-(4-Hydroxyphenyl)Propanoic Acid	Phenolic acids	23508-35-2	B	22724	25864	22317	40347	32187	27073	16131	24081	20606
Xmgn006542	193.05	133.03	194.057	C10H10O4	[M-H]-	Dimethyl Phthalate	Phenolic acids	131-11-3	B	30534	33384	36294	57090	55734	62466	25751	32681	28493
mws0014	193.05	134.01	194.058	C10H10O4	[M-H]-	Ferulic acid	Phenolic acids	537-98-4	B	9	9	9	18533	8795	13511	9	9	9
Lmln010063	205.16	189.13	206.167	C14H22O	[M-H]-	2,6-Di-tert-butylphenol*	Phenolic acids	128-39-2	A	124960	119990	130260	110120	107200	90572	101780	103340	105150
Lmbn013410	205.16	189.13	206.167	C14H22O	[M-H]-	2,4-Di-Tert-Butylphenol*	Phenolic acids	96-76-4	A	111680	119580	129270	103320	119330	95454	105100	85988	99063
MA10107783	207.03	119.05	208.037	C10H8O5	[M-H]-	3-[(1-Carboxyvinyl)oxy]benzoic acid	Phenolic acids	16929-37-6	B	100190	113500	89839	68786	64005	71576	4400	6003.8	7704.5
pme3443	207.07	192	208.074	C11H12O4	[M-H]-	Sinapinaldehyde	Phenolic acids	4206-58-0	B	53229	55415	57729	15747	16137	19949	26874	21665	22291
pmb2620	207.07	133.1	208.074	C11H12O4	[M-H]-	3,4-Dimethoxycinnamic acid	Phenolic acids	14737-89-4	B	2784.1	3423.4	3589.6	5211.2	5818.5	4408.5	3231.2	2980.9	3970.4
mws1509	215.07	121	214.063	C13H10O3	[M+H]+	Phenyl salicylate	Phenolic acids	118-55-8	B	2822.5	2958.7	2222.3	5846.6	5545.8	1640.9	5116.1	1453.3	3104.5
pmp000087	269.1	177.05	268.095	C13H16O6	[M+H]+	2-Feruloyl-sn-glycerol	Phenolic acids	-	B	13197	19202	16960	38287	33379	33883	54811	44678	40966
pme3472	271.09	107.6	272.09	C12H16O7	[M-H]-	Arbutin	Phenolic acids	497-76-7	B	190090	218880	184970	499600	449850	445060	77876	75583	66809
Lmlp012720	279.16	149.02	278.152	C16H22O4	[M+H]+	Dibutyl phthalate*	Phenolic acids	84-74-2	A	21032000	20991000	23228000	20050000	20253000	20817000	17474000	16024000	16850000
Lmxp011770	279.16	149.02	278.152	C16H22O4	[M+H]+	Diisobutyl phthalate*	Phenolic acids	84-69-5	A	20463000	19245000	21939000	19599000	20348000	20416000	17542000	15804000	16617000
Lmhn002926	279.05	163.04	280.058	C13H12O7	[M-H]-	p-Coumaroylmalic acid	Phenolic acids	-	B	50201	52064	43283	104160	78212	95004	45914	67820	62331
mws1521	285.1	121.03	286.105	C13H18O7	[M-H]-	Salicin	Phenolic acids	138-52-3	B	60266	58608	64165	114050	117790	121250	56852	55476	60098
pmn001511	285.1	123	286.105	C13H18O7	[M-H]-	3-Hydroxy-5-Methylphenol-1-O-Glucoside	Phenolic acids	-	A	148470	144860	170530	156870	151530	157170	184480	169850	190780
mws2120	291.01	247	292.022	C13H8O8	[M-H]-	Brevifolin carboxylic acid	Phenolic acids	18490-95-4	B	924860	683540	851230	708990	679930	654730	317030	366180	325080
pmn001687	295.05	163.04	296.053	C13H12O8	[M-H]-	Cis-Coutaric acid	Phenolic acids	67920-37-0	B	23351	14874	21021	22313	36106	29911	30521	36826	30439
Lmhn102068	295.05	179.03	296.053	C13H12O8	[M-H]-	2-O-Caffeoylmalic acid	Phenolic acids	53755-04-7	B	6546.4	6264	7837.7	5437.5	3515.5	6265.3	1959.7	1541.5	1553.1
Zmhn001926	299.08	137.02	300.084	C13H16O8	[M-H]-	1-O-Salicyl-D-glucose	Phenolic acids	60517-74-0	B	19524	12057	23253	148370	130200	125250	47743	41604	64703
Zmhn001358	299.08	137.02	300.084	C13H16O8	[M-H]-	4-O-Glucosyl-4-hydroxybenzoic acid	Phenolic acids	-	A	336010	324520	349770	1256700	1201500	1282100	880650	1011100	828960
pmb3142	299.1	137.1	300.085	C13H16O8	[M-H]-	Salicylic acid-2-O-glucoside	Phenolic acids	10366-91-3	B	3054200	3110500	2939400	9803600	7871200	8869600	4582500	4430000	4757300
Zmhn000892	301.09	139.05	302.1	C13H18O8	[M-H]-	4-O-Glucosyl-3,4-dihydroxybenzyl alcohol	Phenolic acids	-	B	420540	354260	339970	1977100	1872300	1758200	734170	693880	762200
Lmhn003074	309.06	193.05	310.069	C14H14O8	[M-H]-	Feruloylmalic acid	Phenolic acids	-	B	188740	199530	204180	53023	45561	40711	39714	43026	56622
Lmtn003441	311.11	149.06	312.121	C15H20O7	[M-H]-	2-Acetyl-3-hydroxyphenyl-1-O-glucoside	Phenolic acids	-	A	126810	120580	119000	221220	233880	198660	28291	17905	23129
Lmmn002179	313.09	107.05	314.1	C14H18O8	[M-H]-	Methyl salicylate-2-O-glucoside	Phenolic acids	10019-60-0	B	225270	212840	214900	264040	256450	260580	352940	314120	344560
Lmyn002403	313.09	101.02	314.1	C14H18O8	[M-H]-	Mandelic acid-β-glucoside	Phenolic acids	-	B	105350	113420	109950	95553	115650	114870	158520	164820	163370
pmn001367	315.07	153.02	316.079	C13H16O9	[M-H]-	Protocatechuic acid-4-O-glucoside*	Phenolic acids	-	A	2067200	2001700	2166000	6979400	6510300	6471600	3711800	3915400	3840400
pmb2871	315.07	153	316.079	C13H16O9	[M-H]-	1-O-Gentisoyl-D-glucoside*	Phenolic acids	23445-11-6	A	2363100	2249000	2265300	7827900	6970200	7884100	3446900	3335300	3470500
Hmtn001120	315.11	153.06	316.116	C14H20O8	[M-H]-	5-(2-Hydroxyethyl)-2-O-glucosylphenol	Phenolic acids	-	A	349660	356980	348350	2045900	1807700	1807900	1007600	1114600	1103300
pmb0751	321.1	147.3	320.09	C16H16O7	[M+H]+	Trans-5-O-(p-Coumaroyl)shikimate	Phenolic acids	-	B	26776	19613	27255	29971	26653	33976	19439	19084	14691
Zmhn002301	325.09	163.04	326.1	C15H18O8	[M-H]-	p-Coumaric acid-4-O-glucoside*	Phenolic acids	117405-48-8	A	641190	818800	824570	7004800	7271900	6915900	4309200	4415700	4325300
pmn001419	325.09	163.04	326.1	C15H18O8	[M-H]-	1-O-[(E)-p-Cumaroyl]-D-glucose*	Phenolic acids	-	A	754750	613960	854540	6701700	7239700	7126500	4059300	4132300	4669500
Lmsn000363	325.13	145.07	326.137	C16H22O7	[M-H]-	Raspberryketone glucoside	Phenolic acids	38963-94-9	B	44061	72973	69423	95956	171850	126790	66825	45557	51059
Hmsn002272	327.11	165.05	328.116	C15H20O8	[M-H]-	Demethyl coniferin	Phenolic acids	-	B	9	9	9	312180	250460	301860	9	9	9
pmn001690	327.14	165.09	328.152	C16H24O7	[M-H]-	3-Hydroxy-4-isopropylbenzylalcohol-3-O-glucoside	Phenolic acids	-	B	126600	173390	168230	196190	212710	201860	96657	105400	105710
Lmtn002565	329.11	167.03	330.095	C14H18O9	[M-H]-	1-O-Vanilloyl-D-Glucose	Phenolic acids	-	A	7056700	7406100	7964400	5594100	5369800	6343100	4997400	5225700	5312500
Zmhn001883	329.09	209.04	330.095	C14H18O9	[M-H]-	Vanillic acid-4-O-glucoside	Phenolic acids	32142-31-7	B	34568	34543	37828	37576	34830	41658	52944	54531	51057
Lmmn003663	329.09	167.04	330.095	C14H18O9	[M-H]-	5-Glucosyloxy-2-Hydroxybenzoic acid methyl ester	Phenolic acids	-	A	7935100	10488000	12699000	9762900	10125000	10891000	11289000	11166000	13484000
pmn001517	329.12	167	330.131	C15H22O8	[M-H]-	3,4,5-Trimethoxyphenyl-1-O-Glucoside	Phenolic acids	-	B	8273100	8152500	9625000	8656000	8443400	8920100	8963000	8432100	7966900
Lmmn001294	331.1	153.02	332.111	C14H20O9	[M-H]-	Koaburaside	Phenolic acids	41653-73-0	A	6469800	5844300	6775900	4120800	3419000	3421300	4726900	5258000	5245300
Hmln002806	335.08	179.03	336.085	C16H16O8	[M-H]-	5-O-Caffeoylshikimic acid	Phenolic acids	180981-12-8	A	171680	163100	145030	400410	448910	551000	174130	177260	160490
pmn001421	337.09	191.05	338.1	C16H18O8	[M-H]-	3-O-p-Coumaroylquinic acid	Phenolic acids	87099-71-6	A	1421700	1367900	1127600	3768300	3658700	4521200	843080	820170	892950
pma0149	341.08	207.07	340.079	C15H16O9	[M+H]+	Sinapoyl malate	Phenolic acids	92344-58-6	B	76108	61455	67734	21340	22028	16400	32028	26410	23705
pmn001420	341.09	179.04	342.095	C15H18O9	[M-H]-	1-O-[(E)-Caffeoyl]-D-glucose*	Phenolic acids	-	A	1313000	1260800	1405400	744220	911930	953660	1981500	2277700	2161200
Zmhn001793	341.09	179.03	342.096	C15H18O9	[M-H]-	6-O-Caffeoyl-D-glucose*	Phenolic acids	-	A	1320800	1338300	1265100	879250	934870	996100	2128200	2178000	2136600
mws0906	341.12	179	342.131	C16H22O8	[M-H]-	Coniferin	Phenolic acids	531-29-3	B	1175700	1109500	1123000	7263200	6046100	5438500	6718800	9253100	8421300
Lmmn000774	343.1	181.05	344.111	C15H20O9	[M-H]-	Dihydrocaffeoylglucose	Phenolic acids	-	B	394070	406540	442300	245060	237530	362370	551600	586820	402370
Zmln000899	343.11	181.05	344.111	C15H20O9	[M-H]-	Syringaldehyde-4-O-glucoside	Phenolic acids	-	B	49749	49152	52132	129340	167480	146900	182750	172760	199750
Lmtn000940	345.08	139.04	346.09	C14H18O10	[M-H]-	1-O-(3,4-Dihydroxy-5-methoxy-benzoyl)-glucoside	Phenolic acids	-	A	949020	964650	906900	3700700	3637600	3675100	467280	437960	439990
pme1816	353.09	191	354.095	C16H18O9	[M-H]-	Neochlorogenic acid (5-O-Caffeoylquinic acid)	Phenolic acids	906-33-2	A	10708	13732	12237	56369	52786	43689	39717	43940	42903
mws0748	353.09	191.1	354.095	C16H18O9	[M-H]-	1-Caffeoylquinic acid	Phenolic acids	1241-87-8	A	8023900	7709800	8756900	17623000	16458000	19321000	14867000	15786000	14340000
mws2108	353.09	191.05	354.095	C16H18O9	[M-H]-	Cryptochlorogenic acid (4-O-Caffeoylquinic acid)	Phenolic acids	905-99-7	A	1522800	1641900	1467100	1704300	1843500	1921900	1264500	1342900	1307500
mws0178	353.09	191.01	354.095	C16H18O9	[M-H]-	Chlorogenic acid (3-O-Caffeoylquinic acid)	Phenolic acids	327-97-9	A	1436500	1606900	1609300	1919200	2215800	1921700	1315200	1509700	1289000
Lmhn001580	355.07	223.06	356.074	C15H16O10	[M-H]-	Sinapoyltartaric acid	Phenolic acids	-	B	6528.7	7859.1	7967.7	13616	11903	10745	8041.5	7572.3	7257.3
Zmhn002422	355.1	193.05	356.11	C16H20O9	[M-H]-	1-O-Feruloyl-D-Glucose	Phenolic acids	-	B	1775500	2265100	2619700	2256000	2529100	3034400	1830000	3043000	2206200
pmb3056	355.1	121.1	356.111	C16H20O9	[M-H]-	Homovanilloylquinic acid	Phenolic acids	-	B	9678.8	5756.6	7237.3	39264	43992	37929	8705	12807	10506
Zmhn003082	357.08	173.04	358.09	C15H18O10	[M-H]-	5-O-Galloyl-methyl quinine ester	Phenolic acids	-	B	51249	56039	57620	6558.7	6358.1	3254.9	3860	3903.2	6044.2
pme0085	359.08	196.7	360.084	C18H16O8	[M-H]-	Rosmarinic acid	Phenolic acids	537-15-5	B	208620	204900	178260	155760	154050	155410	73092	79028	82334
pmb3107	359.1	182.1	360.106	C15H20O10	[M-H]-	Glucosyringic Acid	Phenolic acids	-	A	2649200	2455500	2724500	799210	771780	777860	947080	1016700	973720
pma3724	369.1	177.1	368.111	C17H20O9	[M+H]+	1-O-Feruloylquinic acid	Phenolic acids	-	B	5768000	5619400	5874000	3490700	3481400	3539800	7223600	7652500	8420600
pmb0752	369.12	177.1	368.111	C17H20O9	[M+H]+	3-O-Feruloylquinic acid	Phenolic acids	1899-29-2	A	59385	50441	41014	24739	32148	36629	31305	27187	30003
mws0179	367.1	190.9	368.111	C17H20O9	[M-H]-	Chlorogenic acid methyl ester	Phenolic acids	29708-87-0	B	826870	960690	840830	422840	591970	561110	1300500	1294100	1275500
Lmtn003598	367.14	205.08	368.147	C18H24O8	[M-H]-	3-Prenyl-4-O-glucosyloxy-4-hydroxybenzoic acid	Phenolic acids	-	B	159430	137970	123650	74296	73329	76633	24458	24260	17587
pmb3317	371.1	179.1	372.106	C16H20O10	[M-H]-	Quinacyl syringic acid	Phenolic acids	-	B	32297	43396	40911	57387	64590	49625	38077	44233	43764
pmn001695	371.1	249.06	372.106	C16H20O10	[M-H]-	Trihydroxycinnamoylquinic acid	Phenolic acids	-	B	18081	20844	23898	51499	63038	63199	26988	24172	32684
mws0011	371.13	209	372.142	C17H24O9	[M-H]-	Syringin	Phenolic acids	118-34-3	B	85654	104100	102460	310160	255560	317780	98665	82424	92614
pmb0108	375.2	137.1	374.1	C19H18O8	[M+H]+	Feruloyl syringic acid	Phenolic acids	-	B	141950	139140	137820	137860	109230	113300	24320	21044	20334
Zmhn002227	385.11	223.06	386.121	C17H22O10	[M-H]-	4-O-Glucosyl-sinapate	Phenolic acids	-	B	324070	269570	311760	120170	82342	105590	197140	209340	187900
HJN003	385.11	223.06	386.122	C17H22O10	[M-H]-	1-O-Sinapoyl-D-glucose	Phenolic acids	-	B	768060	788490	777300	161410	176670	148150	476180	536280	516870
Lmmp010562	391.28	149.02	390.277	C24H38O4	[M+H]+	Diisooctyl Phthalate*	Phenolic acids	27554-26-3	A	6898300	9196900	9929100	7652400	5270500	5996100	7714400	3001000	3325800
Lmwp011196	391.28	149.02	390.277	C24H38O4	[M+H]+	Bis(2-ethylhexyl)phthalate*	Phenolic acids	117-81-7	A	7586700	8781300	9622900	7893600	5566200	6157500	7374400	2666300	3516400
Cmjn004337	401.14	269.1	402.153	C18H26O10	[M-H]-	Benzyl-(2''-O-xylosyl)glucoside	Phenolic acids	-	B	93598	94613	124550	63269	64267	63774	113100	75636	114610
Cmzn005251	433.11	271.06	434.121	C21H22O10	[M-H]-	6-O-Caffeoylarbutin	Phenolic acids	136172-60-6	B	4808600	5237300	4982000	5259700	4542300	5324900	5072300	4398400	4554600
Xmyn004302	449.24	259.06	450.21	C20H34O11	[M-H]-	Ginkgoside A	Phenolic acids	-	B	2149000	2242700	2443100	2223300	3020500	2335500	2906200	2686500	3044400
Li512113	451.09	391.04	452.095	C20H20O12	[M-H]-	Maleoyl-caffeoylquinic acid	Phenolic acids	-	B	17373	16268	20757	14979	9553.5	18325	34600	21264	31738
mad2085	457.08	295.04	458.085	C22H18O11	[M-H]-	Caffeoyl-p-coumaroyltartaric acid	Phenolic acids	-	B	39125	45133	40653	24048	25065	25048	29494	31640	32288
pmb2654	460.1	117.9	461.153	C19H27NO12	[M-H]-	Anthranilate-1-O-Sophoroside	Phenolic acids	-	B	53172	40794	42820	85222	71353	75911	54565	43093	46217
Zmhn002750	461.11	323.08	462.117	C22H22O11	[M-H]-	4-O-(6'-O-Glucosylcaffeoyl)-4-hydroxybenzoic acid	Phenolic acids	-	B	74254	77643	65071	39500	34526	30208	59258	56223	56833
Zmhn002545	463.12	323.08	464.131	C22H24O11	[M-H]-	4-O-(6'-O-Glucosylcaffeoyl)-3,4-dihydroxybenzyl alcohol	Phenolic acids	-	B	88613	73973	69408	12923	9429.8	18850	34268	17929	27379
pmp000265	471.02	301	470.012	C21H10O13	[M+H]+	Sanguisorbic acid dilactone	Phenolic acids	-	B	11322	15542	12094	17424	18282	18833	8556.5	8916.1	10178
pmn001523	473.04	169	474.043	C21H14O13	[M-H]-	Trigallic acid	Phenolic acids	2131-66-0	B	9264.4	9673	9205.4	24643	19016	25587	9678.3	8580.5	10411
Zmhn004909	477.06	169.01	478.075	C21H18O13	[M-H]-	3,4-Digalloylshikimic acid	Phenolic acids	-	B	11527	12663	14437	16466	20902	11942	18187	15453	12960
Zmhn002764	477.11	323.07	478.111	C22H22O12	[M-H]-	4-O-(6'-O-Glucosylcaffeoyl)-3,4-dihydroxybenzoic acid	Phenolic acids	-	B	10939	13549	11021	3492	3524.5	4035.2	20884	9633.5	12038
Zmhn003046	477.14	337.09	478.147	C23H26O11	[M-H]-	4-O-(6'-O-Glucosylferuloyl)-3,4-dihydroxybenzyl alcohol	Phenolic acids	-	B	214070	210730	226310	36838	56059	34011	36861	43805	35147
pmb3066	481.14	319.2	482.142	C22H26O12	[M-H]-	5-O-p-Coumaroylshikimic acid O-glucoside	Phenolic acids	-	B	27767	28381	24482	76629	87783	80970	23398	27349	29101
pmn001707	485.33	485.33	486.335	C30H46O5	[M-H]-	Quillaic acid	Phenolic acids	631-01-6	B	733470	738760	740440	1568100	1602200	2119000	7968300	8339600	8299600
Lmgp003989	499.13	163.04	498.116	C25H22O11	[M+H]+	Dicaffeoylshikimic acid	Phenolic acids	-	B	71277	70557	68007	29323	28605	15755	37302	21764	21940
pmb3064	499.15	163.2	500.153	C22H28O13	[M-H]-	3-O-p-Coumaroylquinic acid-O-glucoside	Phenolic acids	-	B	2164.1	2402.9	1526.6	7565.4	12422	14404	3802.9	4743.9	5838.9
Lmhn003799	501.1	307.05	502.111	C24H22O12	[M-H]-	Feruloylferuloyltartaric acid	Phenolic acids	-	B	223760	244340	212550	141500	131070	146090	133560	137900	151920
mad2394	501.1	337.05	502.111	C24H22O12	[M-H]-	Sinapoyl-p-coumaroyltartaric acid	Phenolic acids	-	B	96345	108240	110350	43730	32235	40725	40660	41537	45589
Lmsn004970	503.12	179.04	504.127	C24H24O12	[M-H]-	3,6-Di-O-caffeoyl glucose	Phenolic acids	-	B	126980	121350	105320	255920	112520	81220	161750	152920	225720
pmb3055	513.1	191.1	514.132	C22H26O14	[M-H]-	p-Coumaroylquinic acid-4'-O-glucuronide	Phenolic acids	-	B	17491	21075	13830	52953	42664	50899	31214	23278	25828
pmn001382	515.12	353.09	516.127	C25H24O12	[M-H]-	Isochlorogenic acid A*	Phenolic acids	2450-53-5	A	547720	563100	597130	580630	639400	757510	424690	359130	315580
Li512115	515.12	353.09	516.127	C25H24O12	[M-H]-	Isochlorogenic acid B*	Phenolic acids	14534-61-3	A	1119500	1218100	951290	420010	375410	515210	416040	561860	514040
mws1584	515.12	191.05	516.127	C25H24O12	[M-H]-	1,3-O-Dicaffeoylquinic Acid (Cynarin)	Phenolic acids	30964-13-7	B	105680	131860	123620	502780	488490	532830	690380	775160	722930
pmn001384	515.12	353.09	516.127	C25H24O12	[M-H]-	Isochlorogenic acid C*	Phenolic acids	57378-72-0	A	982730	896970	879300	360270	466420	365900	492710	413120	608430
Hmbn002692	517.16	175.04	518.164	C22H30O14	[M-H]-	6'-O-Feruloyl-D-sucrose	Phenolic acids	118230-77-6	B	12325	13275	9530.1	6857.7	5732.2	11239	51244	53309	53216
pmn001710	521.13	359.08	522.137	C24H26O13	[M-H]-	Rosmarinic acid-3'-O-glucoside	Phenolic acids	910028-78-3	B	272680	271310	224450	132150	127340	135900	137690	126060	140010
Lmjp003822	531.15	177.06	530.142	C26H26O12	[M+H]+	3,5-O-Dicaffeoylquinic Acid Methyl Ester*	Phenolic acids	159934-13-1	B	1413000	1001400	1110500	362130	343850	474020	181180	207040	275110
Lmjp003731	531.15	177.06	530.142	C26H26O12	[M+H]+	3,4-O-Dicaffeoylquinic Acid Methyl Ester*	Phenolic acids	-	A	1443400	871230	1220700	289130	253120	491590	287070	225340	233520
Lmhn003801	531.12	337.06	532.122	C25H24O13	[M-H]-	Feruloylsinapoyltartaric acid	Phenolic acids	-	B	449440	371400	423530	78389	63339	78708	388840	413070	397750
pmn001671	547.17	223.1	548.174	C23H32O15	[M-H]-	Furanofructosyl-α-D-(6-mustard acyl)glucoside	Phenolic acids	-	B	25433	18167	20398	9	9	9	78330	77213	78951
pmn001547	589.12	437.1	590.127	C27H26O15	[M-H]-	3-Hydroxy-5-Methylphenol-1-O-(6'-Digalloyl)Glucoside	Phenolic acids	-	B	88871	94447	72070	40860	40514	50347	93299	81114	85707
Zmhn002032	609.18	447.13	610.189	C28H34O15	[M-H]-	4-O-(6'-O-Glucosylcaffeoylglucosyl)-4-hydroxybenzyl alcohol	Phenolic acids	-	B	21521	26766	24220	23443	19158	12463	155950	154830	160470
Lmgn002250	677.17	191.06	678.18	C31H34O17	[M-H]-	Dicaffeoylquinic acid-O-glucoside	Phenolic acids	-	B	80832	74276	76471	519760	412750	439800	37851	36347	19567
Lmgn002253	695.2	353.09	696.19	C31H36O18	[M-H]-	Syringoylcaffeoylquinic acid-D-glucose	Phenolic acids	-	A	282180	171500	151590	303780	128090	249950	485870	456900	486380
pme3200	74	57	73.064	C2H7N3	[M+H]+	1-methylguanidine	Nucleotides and derivatives	471-29-4	B	8499.2	9322.8	13048	18865	14003	11338	8701.8	6540.6	6620.7
mws0255	112.05	95	111.043	C4H5N3O	[M+H]+	Cytosine	Nucleotides and derivatives	71-30-7	A	41082	33633	33232	56099	41560	45584	66835	57665	54316
pme0257	111.02	80	112.027	C4H4N2O2	[M-H]-	Uracil	Nucleotides and derivatives	66-22-8	A	228650	246150	245160	213140	245310	232400	239810	231810	266870
mws0572	126.07	109	125.059	C5H7N3O	[M+H]+	5-Methylcytosine	Nucleotides and derivatives	554-01-8	A	13313	11073	9472.5	12848	14687	16776	6576.3	6954.2	8539.2
pme0040	136.06	119	135.054	C5H5N5	[M+H]+	Adenine	Nucleotides and derivatives	73-24-5	A	14665	9796.3	11282	30154	29952	31334	26986	24336	22996
pme1109	152.06	135	151.049	C5H5N5O	[M+H]+	Guanine	Nucleotides and derivatives	73-40-5	B	3768.9	4306.7	2659.2	4812.7	5247.6	4816	10260	11623	12340
pme0183	152.06	135	151.049	C5H5N5O	[M+H]+	Isoguanine	Nucleotides and derivatives	3373-53-3	B	7327.1	2341.6	5120.4	7912.9	7160.6	3992.1	9692.6	19473	8502.6
pmc0274	167.1	121.1	166.031	C6H6N4S	[M+H]+	6-Methylmercaptopurine	Nucleotides and derivatives	50-66-8	B	1729400	1706900	1783900	2233500	2144100	2112500	768910	719590	712940
mws0863	213.02	97	214.024	C5H11O7P	[M-H]-	2-Deoxyribose-5'-phosphate	Nucleotides and derivatives	102916-66-5	A	62371	62608	67652	36213	48451	44296	185090	185850	194640
pmb2507	213.1	97	214.024	C5H11O7P	[M-H]-	2-Deoxyribose-1-phosphate	Nucleotides and derivatives	17210-42-3	A	240550	196230	182640	129140	206890	184780	433170	518650	392240
mws0984	236.08	164.06	237.086	C9H11N5O3	[M-H]-	L-Sepiapterin	Nucleotides and derivatives	17094-01-8	B	3019.1	6019.4	5176.4	4068.5	6294.1	6776.9	5612.5	7742.6	4282.2
ML10180524	244.09	112.05	243.086	C9H13N3O5	[M+H]+	Cytarabine	Nucleotides and derivatives	147-94-4	A	16207	15001	18941	24171	31903	31745	18415	20661	17350
pme3732	244.09	112	243.086	C9H13N3O5	[M+H]+	Cytidine	Nucleotides and derivatives	65-46-3	A	243990	253720	230440	425720	368840	369850	255330	208000	196080
mws0248	243.06	110	244.07	C9H12N2O6	[M-H]-	Uridine	Nucleotides and derivatives	58-96-8	A	14766	17566	14930	11543	14775	11200	11248	11011	6026
pme3961	252.11	136	251.102	C10H13N5O3	[M+H]+	2'-Deoxyadenosine	Nucleotides and derivatives	958-09-8	A	8164.6	10391	9658.7	13270	7481	9823.9	3813	4766.9	6107.5
pme2776	253.09	137	252.086	C10H12N4O4	[M+H]+	2'-Deoxyinosine	Nucleotides and derivatives	890-38-0	B	9	9	9	9	9	9	12821	13246	15996
pme0230	268.1	136.06	267.097	C10H13N5O4	[M+H]+	Adenosine	Nucleotides and derivatives	58-61-7	A	3221400	3501700	3655500	2814600	2912000	2990800	1895700	1814900	2009700
pme1184	268.1	152	267.097	C10H13N5O4	[M+H]+	2'-Deoxyguanosine	Nucleotides and derivatives	961-07-9	A	25241	28327	27731	24428	17803	18958	28724	27326	26416
pme1178	284.1	152	283.092	C10H13N5O5	[M+H]+	Guanosine	Nucleotides and derivatives	118-00-3	B	244770	280750	258080	359160	306840	340540	148230	145340	160620
mws0668	283.07	151	284.076	C10H12N4O6	[M-H]-	Xanthosine	Nucleotides and derivatives	146-80-5	A	7886.7	10484	9682	25535	17851	19306	5689	6397.3	7141.7
Lmqp000329	296.07	104.11	295.056	C8H14N3O7P	[M+H]+	5-Aminoimidazole ribonucleotide	Nucleotides and derivatives	25635-88-5	A	176610	186910	147560	277990	319150	350340	420750	513150	398830
pme1474	298.1	136	297.09	C11H15N5O3S	[M+H]+	5'-Deoxy-5'-(methylthio)adenosine	Nucleotides and derivatives	2457-80-9	A	1167300	1236100	998670	1362400	1393300	1305300	595140	619040	566480
pme1373	306.05	110	307.057	C9H14N3O7P	[M-H]-	2'-Deoxycytidine-5'-monophosphate	Nucleotides and derivatives	1032-65-1	B	6421.8	7810.1	5389.2	15992	15785	13751	9011.6	7319.4	9608.3
pme3967	312.13	180	311.123	C12H17N5O5	[M+H]+	2-(Dimethylamino)guanosine	Nucleotides and derivatives	2140-67-2	B	18255	18120	14577	21393	16838	13171	5232.4	4687.5	8242.2
pme3184	332.08	136	331.068	C10H14N5O6P	[M+H]+	2'-Deoxyadenosine-5'-monophosphate	Nucleotides and derivatives	653-63-4	A	63388	71654	57420	50795	58965	57129	89198	81637	76898
pmc0066	333.05	137.05	332.052	C10H13N4O7P	[M+H]+	2'-Deoxyinosine-5'-monophosphate	Nucleotides and derivatives	3393-18-8	A	18659000	18097000	18178000	17819000	18951000	19593000	18535000	19419000	18923000
mws0675	335.06	123	334.057	C11H15N2O8P	[M+H]+	β-Nicotinamide mononucleotide	Nucleotides and derivatives	1094-61-7	B	18825	27817	18316	30009	21533	19078	41924	35338	29605
pmb0981	348.07	136	347.063	C10H14N5O7P	[M+H]+	Adenosine 5'-monophosphate	Nucleotides and derivatives	61-19-8	A	72685	89262	72427	69575	79053	73440	66823	53758	65546
pmb0532	349.05	137.3	348.047	C10H13N4O8P	[M+H]+	Inosine 5'-monophosphate	Nucleotides and derivatives	131-99-7	B	5495.8	7831	6638.2	7424.6	3166.7	4729.2	3342.3	5103.4	6677.9
pmb0998	364.07	152.1	363.058	C10H14N5O8P	[M+H]+	Guanosine 5'-monophosphate	Nucleotides and derivatives	85-32-5	A	8022.2	4803.2	7334.4	8793.2	8946.2	7376.7	8973.3	9985.1	5595.8
pmb0964	366.2	204.1	365.17	C16H23N5O5	[M+H]+	Isopentenyladenine-7-N-glucoside	Nucleotides and derivatives	-	A	829400	340650	411300	509450	612620	663240	427030	491080	598390
pme3337	384.12	252	383.108	C14H17N5O8	[M+H]+	Succinyladenosine	Nucleotides and derivatives	4542-23-8	B	297190	293920	283280	375070	401500	396470	308220	307540	275220
pmc0281	400.15	136.11	399.139	C15H21N5O8	[M+H]+	Ribosyladenosine	Nucleotides and derivatives	-	B	12012	11886	9789	42429	31849	31984	26356	33538	29232
pme3007	402.99	159	404.002	C9H14N2O12P2	[M-H]-	Uridine 5'-diphosphate	Nucleotides and derivatives	27821-45-0	B	6653.7	9337.2	7795.8	12631	9293.3	13812	9717.8	6175	7093.8
pme2117	426	159	427.029	C10H15N5O10P2	[M-H]-	Adenosine 5'-diphosphate	Nucleotides and derivatives	58-64-0	A	89790	110370	91103	155010	171510	146010	75899	105870	105620
Zmfn000481	535.04	323.03	536.044	C14H22N2O16P2	[M-H]-	Uridine-5'-Diphosphate-D-Xylose	Nucleotides and derivatives	3616-06-6	B	26283	20225	4829.6	20154	17518	5200	18326	36858	32042
pmb2922	565.05	323.1	566.055	C15H24N2O17P2	[M-H]-	Uridine 5'-diphospho-D-glucose	Nucleotides and derivatives	133-89-1	B	118160	133490	32684	163800	142130	125180	137770	175240	170400
pmb0530	664.12	136.2	663.109	C21H27N7O14P2	[M+H]+	Nicotinic acid adenine dinucleotide	Nucleotides and derivatives	53-84-9	B	43342	56090	54006	90480	70390	90697	71521	61239	60386
pme2651	742.1	620.1	743.075	C21H28N7O17P3	[M-H]-	NADP (Nicotinamide adenine dinucleotide phosphate)	Nucleotides and derivatives	53-59-8	B	47447	66166	68645	74953	63630	61410	47653	42316	38482
pme2746	784.15	437	785.157	C27H33N9O15P2	[M-H]-	Riboflavin 5'-Adenosine Diphosphate	Nucleotides and derivatives	146-14-5	A	8293.6	10802	10985	13908	15909	10572	13999	15448	12173
pme2960	273.08	153	272.068	C15H12O5	[M+H]+	Naringenin chalcone	Chalcones	73692-50-9	B	335060	272870	307140	442890	497150	419880	83108	89588	81870
pme1201	273.08	167	274.084	C15H14O5	[M-H]-	Phloretin	Chalcones	60-82-2	A	91171	84719	97453	149360	120390	114070	64473	70017	54023
Lmlp006175	435.13	273.09	434.121	C21H22O10	[M+H]+	Isosalipurposide (Phlorizin Chalcone)	Chalcones	4547-85-7	B	240560	147830	177000	1120500	755450	1064400	109720	118980	103540
HJN055	435.13	273.08	436.136	C21H24O10	[M-H]-	Dihydrocharcone-4'-O-glucoside	Chalcones	-	A	1083900	1199900	906770	1334800	1210600	1363200	782460	841940	818540
mws2118	435.13	166.7	436.137	C21H24O10	[M-H]-	Phloretin-2'-O-glucoside (Phlorizin)	Chalcones	60-81-1	A	1073400	1222600	1022200	1460200	1470700	1410400	869660	949150	797590
Lmfn004093	435.13	315.09	436.137	C21H24O10	[M-H]-	Phloretin-4'-O-glucoside (Trilobatin)	Chalcones	4192-90-9	B	22051	18123	24814	22459	16262	18161	7695.8	7677	9392.2
Hmpn005101	451.12	289.07	452.131	C21H24O11	[M-H]-	Sieboldin	Chalcones	18777-73-6	B	671260	580080	576960	382380	320760	277150	333840	380520	438280
Zmpn004068	567.17	273.08	568.179	C26H32O14	[M-H]-	Phloretin-2'-O-(6''-O-xylosyl)glucoside	Chalcones	-	A	6704800	6144200	7597000	907850	883980	750220	3499300	3828900	3563500
pme0376	271.06	151	272.068	C15H12O5	[M-H]-	Naringenin (5,7,4'-Trihydroxyflavanone)*	Dihydroflavone	480-41-1	A	81189	82263	96307	204970	199450	212780	28467	33198	25247
mws0064	287.06	135	288.063	C15H12O6	[M-H]-	Eriodictyol (5,7,3',4'-Tetrahydroxyflavanone)	Dihydroflavone	552-58-9	B	21844	20908	21428	69340	68928	74861	5461.2	5820.7	6130.8
mws0463	301.07	164	302.079	C16H14O6	[M-H]-	Hesperetin	Dihydroflavone	520-33-2	B	2416.9	1611.3	1066.4	2896.1	1814.4	2187.8	385.99	857.44	700.48
mws1179	433.11	271	434.121	C21H22O10	[M-H]-	Naringenin-7-O-glucoside (Prunin)*	Dihydroflavone	529-55-5	A	1948200	1764900	1872700	1648300	1189700	1456200	1777400	1474500	1733400
mws0057	451.12	289	450.116	C21H22O11	[M+H]+	Eriodictyol-7-O-glucoside	Dihydroflavone	38965-51-4	B	432510	469910	485960	879700	802380	764850	497430	488560	491360
pmb3023	449.11	287	450.116	C21H22O11	[M-H]-	Eriodictyol-8-C-glucoside	Dihydroflavone	1023271-51-3	B	489960	672290	629690	495480	699660	575700	897060	1196800	1080900
HJN086	449.11	287.06	450.116	C21H22O11	[M-H]-	Eriodictyol-3'-O-glucoside	Dihydroflavone	-	B	4524200	4249400	3914700	12943000	12726000	13037000	3614700	4338300	3490500
mws1066	579.17	271	580.179	C27H32O14	[M-H]-	Naringenin-7-O-Rutinoside(Narirutin)*	Dihydroflavone	14259-46-2	B	18386	26162	21196	21827	18150	22137	38346	41808	34956
mws0046	579.17	271.06	580.179	C27H32O14	[M-H]-	Naringenin-7-O-Neohesperidoside(Naringin)*	Dihydroflavone	10236-47-2	B	16772	18891	12805	25680	24468	31542	33100	26743	27250
mws0791	593.19	285	594.195	C28H34O14	[M-H]-	Poncirin (Isosakuranetin-7-O-neohesperidoside)	Dihydroflavone	14941-08-3	B	197320	207270	187780	250270	208960	228870	139430	172810	138950
Lmyn005006	595.15	287.06	596.153	C30H28O13	[M-H]-	"Eriodictyol-7-O-(6""-O-p-coumaroyl)glucoside"	Dihydroflavone	-	B	387080	390610	330980	322700	321050	306710	185740	181110	190490
mws0914	271.06	151	272.068	C15H12O5	[M-H]-	Pinobanksin*	Dihydroflavonol	548-82-3	A	43269	42666	44501	160320	153600	162970	25779	27598	23677
mws1000	287.06	149	288.063	C15H12O6	[M-H]-	Fustin	Dihydroflavonol	20725-03-5	B	885570	721230	673210	589090	499880	652060	393910	361860	349880
mws1094	287.06	259	288.063	C15H12O6	[M-H]-	Aromadendrin (Dihydrokaempferol)	Dihydroflavonol	480-20-6	B	10204	14306	12547	11482	13299	12543	4997	3401.8	3697.6
mws0044	303.05	125.02	304.058	C15H12O7	[M-H]-	Dihydroquercetin(Taxifolin)	Dihydroflavonol	480-18-2	B	93371	117090	115870	84969	108300	117440	25269	53835	60493
mws1361	449.11	151	450.116	C21H22O11	[M-H]-	Taxifolin-3-O-rhamnoside (Astilbin)	Dihydroflavonol	29838-67-3	B	1784300	1706800	1816100	2761900	2831100	2708400	1759900	1752100	1974600
pme1598	463.12	301	464.132	C22H24O11	[M-H]-	Hesperetin-5-O-glucoside	Dihydroflavonol	69651-80-5	B	1446200	1199800	1343100	2597900	2294200	2119300	1730600	1532700	1331300
HJN104	481.14	319.08	482.105	C21H22O13	[M-H]-	Dihydromyricetin-3-O-glucoside	Dihydroflavonol	-	B	9	9	9	338350	309680	346940	19886	17527	31960
pmb2979	549.12	387.1	550.132	C25H26O14	[M-H]-	Hesperetin-7-O-(6''-malonyl)glucoside	Dihydroflavonol	-	B	25352	36197	29868	25416	32060	28738	20719	21672	33693
pmf0027	449.11	287.06	449.108	C21H21O11+	[M]+	Cyanidin-3-O-galactoside*	Anthocyanins	142506-26-1	A	460710	373010	530300	163510000	189900000	186840000	25951000	16565000	16283000
pmb0550	449.11	287.06	449.108	C21H21O11+	[M]+	Cyanidin-3-O-glucoside (Kuromanin)*	Anthocyanins	47705-70-4	A	351830	371990	443620	178550000	166730000	175220000	27145000	19274000	18830000
mws0040	255.07	153	254.058	C15H10O4	[M+H]+	Chrysin	Flavonoid	480-40-0	A	523000	508750	509940	472800	463640	493960	218140	209180	212710
mws1662	269.08	226	268.074	C16H12O4	[M+H]+	Tectochrysin	Flavonoid	520-28-5	B	2240.7	1593.7	1586.5	3127.2	2818	3077.8	13002	11227	10405
pmp000571	271.06	153.01	270.053	C15H10O5	[M+H]+	Apigenin	Flavonoid	520-36-5	A	24610	23475	28827	33736	25510	25984	6231.7	7631.8	6655.1
pme0088	285.04	151	286.048	C15H10O6	[M-H]-	Luteolin (5,7,3',4'-Tetrahydroxyflavone)	Flavonoid	491-70-3	B	9591.2	12340	10926	30726	26548	30035	5398.9	4718.5	5702.7
NK10256198	285.04	257.05	286.048	C15H10O6	[M-H]-	3,5,7,2'-Tetrahydroxyflavone; Datiscetin	Flavonoid	480-15-9	B	4007.5	3268	5301.3	1279.6	1569.6	1365.9	6937.1	6560.2	5651.4
Lmgp004167	291.09	139.04	290.079	C15H14O6	[M+H]+	3',4,4',5,7-Pentahydroxyflavan (Luteoforol)	Flavonoid	13392-26-2	B	623270	568810	592730	493870	761560	772530	377510	230690	260480
mws0058	299.06	284	300.063	C16H12O6	[M-H]-	Diosmetin (5,7,3'-Trihydroxy-4'-methoxyflavone)	Flavonoid	520-34-3	B	6258.1	6856.4	7441.8	7022.8	5567.8	6010.1	5591.6	5347.2	3876.1
Zmpp002571	303.05	257.05	302.043	C15H10O7	[M+H]+	Robinetin	Flavonoid	490-31-3	B	2724700	2631600	2301900	2904300	3038500	3907400	2061300	2370100	2253200
mws0043	403.14	373.1	402.131	C21H22O8	[M+H]+	Nobiletin (5,6,7,8,3',4'-Hexamethoxyflavone)	Flavonoid	478-01-3	B	174560	175870	168300	146630	158850	154730	155700	154260	163220
Lmyp005841	417.12	255.06	416.111	C21H20O9	[M+H]+	Chrysin-7-O-glucoside	Flavonoid	31025-53-3	A	372360	358270	366620	561760	618120	603210	1141600	1137200	1154700
Lmyp004617	419.13	257.08	418.127	C21H22O9	[M+H]+	Pinocembrin-7-O-glucoside (Pinocembroside)	Flavonoid	75829-43-5	B	193890	174790	179710	325920	307820	320280	136880	131440	144590
Zmhp002776	431.1	255.07	430.09	C21H18O10	[M+H]+	Chrysin-7-O-Glucuronide	Flavonoid	35775-49-6	B	1844.6	1606.1	2075.5	1669.8	2009.2	1764.1	3779.7	3447.2	5361.4
mws0072	433.11	271.01	432.106	C21H20O10	[M+H]+	Apigenin-5-O-glucoside	Flavonoid	28757-27-9	A	18060000	19681000	17723000	23840000	23776000	21078000	13743000	12246000	14167000
HJN087	433.12	271.06	434.121	C21H22O10	[M-H]-	Naringenin-4'-O-glucoside*	Flavonoid	-	A	1977900	1965800	1816200	6514100	6103700	6338600	1066800	1046600	1005500
pme2459	449.11	287.2	448.101	C21H20O11	[M+H]+	Luteolin-7-O-glucoside (Cynaroside)	Flavonoid	5373-11-5	B	1368800	1343100	1458000	1137900	1362300	1296600	2129800	1704700	1345200
Hmpp003270	449.11	287.05	448.101	C21H20O11	[M+H]+	Luteolin-4'-O-glucoside*	Flavonoid	6920-38-3	A	4874400	5425000	6575900	6031100	6082600	5916000	7787900	7705200	8084500
Lmlp003531	449.11	287.06	448.101	C21H20O11	[M+H]+	Luteolin-3'-O-glucoside*	Flavonoid	5154-41-6	A	6684400	5988300	5316000	5318000	6346600	4252700	7673700	9104200	9864000
Lmtn002796	449.1	287.05	450.116	C21H22O11	[M-H]-	Aromadendrin-7-O-glucoside	Flavonoid	28189-90-4	B	172600	172760	156620	511680	539530	650120	442700	434730	512050
mws4167	463.09	287.06	462.08	C21H18O12	[M+H]+	Luteolin-7-O-glucuronide	Flavonoid	29741-10-4	B	9	9	9	23170	3707.5	11163	9	9	9
pmb2999	461.11	299.1	462.116	C22H22O11	[M-H]-	Chrysoeriol-5-O-glucoside	Flavonoid	-	B	4014400	4557700	4265500	14479000	13586000	12244000	6933900	8101400	8141600
pmp000579	463.12	301.07	462.116	C22H22O11	[M+H]+	Diosmetin-7-O-galactoside	Flavonoid	-	B	202930	217860	293970	357520	309150	356420	48219	116230	120170
Hmgp002189	463.13	301.07	462.118	C22H22O11	[M+H]+	Hispidulin-7-O-Glucoside	Flavonoid	17680-84-1	B	2733300	2506500	2796200	1441600	1466300	1528700	2354900	2497900	2372600
Lmzp002365	465.14	303.09	464.131	C22H24O11	[M+H]+	Hesperetin-7-O-glucoside	Flavonoid	31712-49-9	B	2250800	3247000	3800200	28083000	21520000	23614000	5449900	5560400	6086100
Xmsn002700	465.13	303.06	466.111	C21H22O12	[M-H]-	Taxifolin-3'-O-glucoside	Flavonoid	31106-05-5	B	3772700	3982400	3743900	6079700	6681500	5733000	4519700	3840500	3467700
pma0825	503	255	502.111	C24H22O12	[M+H]+	Chrysin-7-O-(6''-malonyl)glucoside	Flavonoid	-	B	39098	43625	39295	41937	50813	54877	34108	31066	30327
pmb3000	503.12	341.1	504.127	C24H24O12	[M-H]-	Chrysoeriol-7-O-(6''-acetyl)glucoside	Flavonoid	-	B	1205900	1106700	961470	2834000	2332400	2625000	2035000	1790100	1847100
pmb3041	521.09	329.2	522.101	C23H22O14	[M-H]-	Tricin-7-O-saccharic acid	Flavonoid	-	B	290400	279430	325140	347390	290190	265880	133100	149120	131610
pmp000587	535.11	449.1	534.101	C24H22O14	[M+H]+	Luteolin-7-O-(6''-malonyl)glucoside	Flavonoid	-	A	9207	8808.6	8019.1	50718	51693	43311	29247	27669	23772
pmb0608	549.12	301.4	548.117	C25H24O14	[M+H]+	Chrysoeriol-7-O-(6''-malonyl)glucoside	Flavonoid	-	B	93583	107620	99546	76403	60605	77943	23359	25184	21926
HJAP064	565.12	317.08	564.088	C25H24O15	[M+H]+	Isorhamnetin-3-O-(6''-malonylglucoside)	Flavonoid	-	B	2587900	2695600	2504000	4698800	4668300	4535900	2242800	2412100	2338400
pme0368	579.17	271.01	578.164	C27H30O14	[M+H]+	Apigenin-7-O-rutinoside (Isorhoifolin)	Flavonoid	552-57-8	B	1519600	1390500	1687600	1268800	1338700	1459300	664270	737210	615280
Hmjn004446	593.13	285.04	594.137	C30H26O13	[M-H]-	Luteolin-7-O-(6''-caffeoyl)rhamnoside	Flavonoid	-	B	30284	35152	38619	62370	55118	58774	32977	37937	39209
Lmyp004407	595.14	287.05	594.137	C30H26O13	[M+H]+	Kaempferol-3-O-(2''-p-Coumaroyl)galactoside*	Flavonoid	-	B	304480	304170	305320	226610	226440	228210	380310	368900	353940
Lmyp004318	595.14	287.06	594.137	C30H26O13	[M+H]+	Kaempferol-3-O-(6''-p-Coumaroyl)galactoside*	Flavonoid	-	B	297660	289480	303750	229490	214250	223710	371820	339350	354260
Hmlp003068	627.15	303.05	626.148	C27H30O17	[M+H]+	Meratin	Flavonoid	27215-04-9	A	978950	1121400	1011800	11995000	12309000	13154000	10853000	11566000	10616000
pmb2991	739.21	269.2	740.216	C33H40O19	[M-H]-	Apigenin-7-O-glucoside-4'-O-rutinoside	Flavonoid	-	B	84777	96516	88534	212130	161270	172080	86838	82108	71818
Lmcp004624	301.07	258.05	300.063	C16H12O6	[M+H]+	3-Methylkaempferol	Flavonols	1592-70-7	B	32894	39739	38183	17337	6854.4	13481	31407	29299	23627
Lmcp004693	301.07	258.05	300.063	C16H12O6	[M+H]+	Kaempferide (3,5,7-Trihydroxy-4'-methoxyflavone)	Flavonols	491-54-3	B	34172	21377	34982	10026	7366.5	14635	29128	32394	28411
pme2954	303.05	137.02	302.043	C15H10O7	[M+H]+	Quercetin	Flavonols	117-39-5	A	9	9	9	247990	269690	248240	45590	38699	56574
Cmsp004086	303.09	229.08	302.079	C16H14O6	[M+H]+	Dihydrokaempferide	Flavonols	137225-59-3	B	1151100	1117600	1191000	1741700	2944600	728070	980760	664720	475520
Lmcp004369	331.08	287.05	330.074	C17H14O7	[M+H]+	Quercetin-3',4'-dimethyl ether	Flavonols	3306-29-4	B	9296.5	20246	14699	35423	27591	33533	28073	28425	20442
mws0055	373.13	343.09	372.121	C20H20O7	[M+H]+	Tangeretin (4',5,6,7,8-Pentamethoxyflavone)	Flavonols	481-53-8	B	184510	188850	204170	163180	154170	150380	142650	147520	136460
pmn001637	417.08	285	418.09	C20H18O10	[M-H]-	Kaempferol-3-O-arabinoside (Juglanin)	Flavonols	5041-67-8	A	1291400	1476700	1322100	2793700	2898200	3106400	730090	740690	797850
mws0919	431.1	285	432.106	C21H20O10	[M-H]-	Kaempferol-3-O-rhamnoside (Afzelin)(Kaempferin)	Flavonols	482-39-3	B	762330	770220	829680	278730	263740	245820	502500	479580	496520
pmp000117	433.15	403.11	432.142	C22H24O9	[M+H]+	3,5,6,7,8,3',4'-Heptamethoxyflavone	Flavonols	1178-24-1	B	2283.5	2990.7	2377.9	2790	2693.2	2360.4	2262	1929.3	2370.5
mws4183	433.08	300.03	434.085	C20H18O11	[M-H]-	Quercetin-3-O-arabinoside (Guaijaverin)*	Flavonols	22255-13-6	A	6523900	6061300	7504800	22906000	17337000	18175000	8243700	8743300	7374800
Lmdp003509	435.09	303.06	434.085	C20H18O11	[M+H]+	Quercetin-3-O-xyloside (Reynoutrin)*	Flavonols	549-32-6	A	13313000	12719000	12278000	32058000	30801000	30435000	9735100	10264000	9934800
mws2186	435.09	303	434.085	C20H18O11	[M+H]+	Avicularin(Quercetin-3-O-α-L-arabinofuranoside)*	Flavonols	572-30-5	A	18998000	18089000	17045000	41091000	39898000	41229000	13205000	14119000	14582000
Hmcp002316	449.11	317.06	448.1	C21H20O11	[M+H]+	Isorhamnetin-3-O-arabinoside	Flavonols	-	B	278700	325630	347480	213850	205590	214660	124990	138680	135370
mws0045	449.11	303.05	448.101	C21H20O11	[M+H]+	Quercetin-3-O-rhamnoside(Quercitrin)	Flavonols	522-12-3	A	406550	394040	331980	3011500	2827200	3169100	680700	711470	719890
mws2209	449.11	287.06	448.101	C21H20O11	[M+H]+	Kaempferol-3-O-glucoside (Astragalin)*	Flavonols	480-10-4	B	5904500	5912700	6158200	6351000	7009500	6338100	6751400	6342900	8572000
mws0913	447.09	285	448.101	C21H20O11	[M-H]-	Kaempferol-3-O-galactoside (Trifolin)*	Flavonols	23627-87-4	B	401380	437210	532260	1706900	1865600	2144800	1047700	857690	989850
Lmzn001894	461.07	285.04	462.08	C21H18O12	[M-H]-	Kaempferol-3-O-glucuronide	Flavonols	22688-78-4	B	29625	23674	23167	84995	72584	71442	33209	35584	41876
Lmpn006208	461.11	315.05	462.116	C22H22O11	[M-H]-	8-Methoxykaempferol-7-O-rhamnoside	Flavonols	-	B	229910	232890	207260	35419	39400	32175	85666	88527	75606
Hmcp002539	463.12	317.06	462.116	C22H22O11	[M+H]+	Isorhamnetin-3-O-rhamnoside	Flavonols	-	B	5717.8	6689.3	8300.3	13012	10702	12774	2722	3775.5	5147.5
mws0061	463.09	300	464.095	C21H20O12	[M-H]-	Quercetin-3-O-galactoside (Hyperin)*	Flavonols	482-36-0	A	10863000	10591000	11139000	16574000	18625000	17431000	14477000	14156000	13746000
mws0091	463.09	300.03	464.095	C21H20O12	[M-H]-	Quercetin-3-O-glucoside (Isoquercitrin)*	Flavonols	482-35-9	A	10165000	10843000	10559000	17280000	21296000	20897000	14996000	13946000	13344000
Lmdp003286	465.1	303.06	464.095	C21H20O12	[M+H]+	Isohyperoside	Flavonols	35589-21-0	B	1709600	1744200	1726900	3616300	3632600	3676100	2299400	2196000	2093000
mws1329	463.09	300.7	464.095	C21H20O12	[M-H]-	Quercetin-7-O-glucoside*	Flavonols	491-50-9	A	9037800	7831700	8470200	15799000	16896000	15438000	12614000	10996000	10765000
HJAP154	469.13	317.08	468.069	C23H16O11	[M+H]+	Galloylisorhamnetin	Flavonols	-	B	13349	13385	15697	15217	18088	17147	36443	40247	36629
Hmmp002121	469.12	317.08	468.113	C23H16O11	[M+H]+	Isorhamnetin-3-O-gallate	Flavonols	-	B	19631	19717	26900	10201	14457	18792	27178	42197	23069
pmn001641	475.09	300	476.095	C22H20O12	[M-H]-	Kaempferide-3-O-glucuronide	Flavonols	-	B	98649	105330	110070	482050	637720	630510	154660	139340	151940
Lmmp003783	479.09	303.05	478.075	C21H18O13	[M+H]+	Quercetin-3-O-glucuronide	Flavonols	22688-79-5	B	59636	47697	60754	272380	307030	280750	67583	65345	69429
Lmjp003044	479.12	317.06	478.111	C22H22O12	[M+H]+	Isorhamnetin-3-O-Glucoside*	Flavonols	5041-82-7	A	3141700	3222000	3023500	6247300	5727300	6176700	3071900	2727000	3084400
Lmjp002906	479.12	317.07	478.111	C22H22O12	[M+H]+	Rhamnetin-3-O-Glucoside*	Flavonols	27875-34-9	A	3249600	2951300	2959200	5863200	5913000	6009600	3033900	3027800	3003200
Hmcp002207	479.12	317.06	478.111	C22H22O12	[M+H]+	Isorhamnetin-7-O-glucoside (Brassicin)*	Flavonols	6743-96-0	A	3084100	2897200	2738000	5990500	5607800	5986300	2979100	2794300	2756000
Lmdp002969	481.1	319.06	480.09	C21H20O13	[M+H]+	Myricetin-3-O-galactoside*	Flavonols	15648-86-9	A	576990	512700	479730	3151600	3207900	3617200	839130	881830	825690
Lmpp003465	481.1	319.04	480.09	C21H20O13	[M-H]-	Myricetin-3-O-glucoside*	Flavonols	19833-12-6	A	487600	553850	427600	3230000	3084000	3040200	834540	943030	815900
Lmmn003398	489.11	285.04	490.111	C23H22O12	[M-H]-	Kaempferol-3-O-(6''-acetyl)glucoside	Flavonols	-	A	2006400	3291400	1548800	22425000	16700000	19668000	9188600	8002300	10050000
Hmln002199	505.1	300.03	506.107	C23H22O13	[M-H]-	Quercetin-3-O-(6''-acetyl)galactoside	Flavonols	-	A	2500000	2076500	2047100	5902800	6585800	3804500	3329300	4128600	4344200
pmn001644	519.08	300	520.085	C23H20O14	[M-H]-	Quercetin-3-O-(2''-acetyl)glucuronide	Flavonols	-	B	82377	73532	119780	754000	805430	791240	144290	137750	156830
Li512111	519.11	315.05	520.122	C24H24O13	[M-H]-	Isorhamnetin-3-O-(6''-acetylglucoside)	Flavonols	-	B	773120	924950	849340	1538600	1467900	1433200	841790	823010	862750
Lmmp003817	535.11	287.05	534.101	C24H22O14	[M+H]+	Kaempferol-3-O-(6''-malonyl)glucoside*	Flavonols	-	A	9806600	9074400	8793600	56924000	59146000	60982000	34355000	31695000	33552000
Lmdp004892	535.11	287.05	534.101	C24H22O14	[M+H]+	Kaempferol-3-O-(6''-malonyl)galactoside*	Flavonols	-	A	10248000	9468300	8846100	59977000	60062000	59573000	33499000	33169000	31994000
pmp000589	551.1	303.05	550.096	C24H22O15	[M+H]+	Quercetin-7-O-(6''-malonyl)glucoside*	Flavonols	-	A	159900	199620	157560	916010	740310	889080	261500	205780	319160
Hmln002189	549.09	505.11	550.096	C24H22O15	[M-H]-	Quercetin-3-O-(6''-malonyl)galactoside*	Flavonols	-	A	7215000	6730600	5930800	19432000	19767000	20083000	12030000	12084000	9885600
Lmtp004126	567.1	319.04	566.091	C24H22O16	[M+H]+	Myricetin-3-O-(6''-malony)glucoside	Flavonols	-	B	95039	135380	159000	875640	1105400	1114700	319630	331040	320720
Lmmp003306	567.13	303.05	566.127	C25H26O15	[M+H]+	Quercetin-3-O-xylosyl(1→2)arabinoside	Flavonols	-	B	71295	55947	32259	269520	187540	211620	56239	68113	51585
pme2493	579.17	287.1	578.164	C27H30O14	[M+H]+	Kaempferol-3,7-O-dirhamnoside (Kaempferitrin)	Flavonols	482-38-2	B	3632300	2962700	3249900	3110400	2467900	3124500	1625900	1715900	1376800
Hmcp001769	581.15	303.04	580.142	C26H28O15	[M+H]+	Quercetin-3-O-rhamnosyl(1→2)arabinoside	Flavonols	-	B	189040	212220	174600	311870	346520	355080	318040	324830	293230
Lmfp005436	587.1	303.09	586.096	C27H22O15	[M+H]+	Quercetin-3-O-(2''-Galloyl)Arabinoside	Flavonols	-	B	3932.5	3017.2	4818.3	16699	13296	13842	11259	13682	14277
mws1290	593.13	285	594.137	C30H26O13	[M-H]-	Kaempferol-3-O-(6''-p-Coumaroyl)glucoside (Tiliroside)*	Flavonols	20316-62-5	B	197060	187960	190090	235460	214820	263280	156070	189630	171480
Lmjp002596	597.14	303.05	596.138	C26H28O16	[M+H]+	Quercetin-3-O-sambubioside*	Flavonols	83048-35-5	A	222520	180320	195880	1250500	1306200	1620900	479400	404410	482650
Lmtp004044	597.14	303.04	596.138	C26H28O16	[M+H]+	Quercetin-3-O-apiosyl(1→2)galactoside*	Flavonols	-	A	206940	172560	171770	1052200	1321400	1369000	456580	283030	393740
Lmyp004052	611.14	147.04	610.132	C30H26O14	[M+H]+	Quercetin-3-O-(6''-p-Coumaroyl)galactoside*	Flavonols	-	B	24293	28714	27738	119690	110290	124990	82095	98996	85314
Lmyp004516	611.14	147.04	610.132	C30H26O14	[M+H]+	Quercetin-3-O-(2''-p-Coumaroyl)galactoside*	Flavonols	-	B	10931	8797.1	10397	32182	32754	33705	21449	24807	20935
Lmyp004770	611.14	147.04	610.132	C30H26O14	[M+H]+	Quercetin-3-O-(2''-p-Coumaroyl)glucoside*	Flavonols	-	B	10757	8572.9	8602.2	30778	34190	35326	22873	23007	23449
Lmdp004267	611.14	147.04	610.132	C30H26O14	[M+H]+	Quercetin-3-O-(6''-p-Coumaroyl)glucoside*	Flavonols	-	B	24876	35457	17671	122360	104800	116420	90039	87763	86410
Lmmp003091	611.16	303.05	610.153	C27H30O16	[M+H]+	Quercetin-3-O-(4''-O-glucosyl)rhamnoside	Flavonols	59262-54-3	B	19004000	21199000	18125000	109770	393550	104820	26997000	28543000	26669000
Lmjp002461	611.16	303.05	610.153	C27H30O16	[M+H]+	Quercetin-3-O-neohesperidoside*	Flavonols	117611-67-3	A	20615000	19687000	18044000	140140	373240	105000	28036000	28565000	27846000
mws0059	609.15	301	610.153	C27H30O16	[M-H]-	Quercetin-3-O-rutinoside (Rutin)*	Flavonols	153-18-4	A	9460700	9658600	11012000	63785	170340	51900	16665000	14457000	13821000
pmn001583	609.15	300	610.153	C27H30O16	[M-H]-	Quercetin-3-O-robinobioside*	Flavonols	52525-35-6	A	12489000	14245000	13123000	57049	211690	49237	19831000	17971000	17908000
Lmbp002336	611.16	303.05	610.153	C27H30O16	[M+H]+	Quercetin-3-O-(2''-O-rhamnosyl)galactoside	Flavonols	-	B	42531	34889	49449	78980	76514	116090	108470	139830	123300
pmp000596	627.16	465.1	626.148	C27H30O17	[M+H]+	Quercetin-3-O-(2''-O-galactosyl)glucoside	Flavonols	56782-99-1	B	69361	56139	49491	599540	501450	577030	194700	188960	180500
pmp001310	627.16	303.1	626.148	C27H30O17	[M+H]+	6-Hydroxykaempferol-3,6-O-Diglucoside	Flavonols	-	A	97663	130080	100130	6720800	7527000	6783400	1351000	1286600	1369100
Lmtp003677	627.16	303.04	626.148	C27H30O17	[M+H]+	Quercetin-3-O-sophoroside (Baimaside)	Flavonols	18609-17-1	B	228000	241870	169720	1552000	1825000	2125900	656570	596190	615240
Lmmp002560	641.13	303.05	640.128	C27H28O18	[M+H]+	Quercetin-3-O-(2''-O-glucosyl)glucuronide	Flavonols	-	B	8122.2	11646	10769	38292	29228	30557	20605	19132	20957
Lmmp003266	683.15	303.05	682.138	C29H30O19	[M+H]+	Quercetin-3-O-(2''-malonyl)glucoside-7-O-arabinoside	Flavonols	-	B	27698	28578	23716	117760	116000	118240	69547	69328	69614
Hmcp001629	697.16	449.1	696.153	C30H32O19	[M+H]+	Kaempferol-3-O-(6''-Malonyl)glucoside-7-O-Glucoside	Flavonols	-	B	13529	17875	15206	567450	565070	554670	596400	696320	646930
Lmmp002995	713.15	303.06	712.149	C30H32O20	[M+H]+	Quercetin-7-O-(2''-malonyl)glucosyl-5-O-glucoside	Flavonols	-	B	74269	132610	106950	7386700	5694400	6238700	730470	679720	560960
pmb0709	713.16	465.2	712.149	C30H32O20	[M+H]+	Quercetin-7-O-(6''-malonyl)glucosyl-5-O-glucoside	Flavonols	-	A	232530	197710	206170	14548000	14939000	15696000	1897000	1694300	1906900
pmb0706	713.16	465.1	712.149	C30H32O20	[M+H]+	Quercetin-3-O-(6''-malonyl)glucosyl-5-O-glucoside	Flavonols	-	A	925620	1060600	1052800	10226000	10176000	10304000	7108500	6655700	6085000
Lmsp002982	773.21	303.05	772.206	C33H40O21	[M+H]+	Quercetin-3-O-sophoroside-7-O-rhamnoside	Flavonols	-	B	11310	8678.7	11177	9	9	9	100590	111900	97555
mws0048	431.1	311	432.106	C21H20O10	[M-H]-	Apigenin-8-C-Glucoside (Vitexin)	Flavonoid carbonoside	3681-93-4	B	86516	89936	87023	20584	39743	26205	47509	45126	35053
pme1611	433.11	313	434.121	C21H22O10	[M-H]-	Isohemiphloin	Flavonoid carbonoside	3682-02-8	B	123750	128530	116810	77622	104310	80752	39549	50561	51131
pma0724	435.13	285.1	434.121	C21H22O10	[M+H]+	Naringenin-6-C-Glucoside	Flavonoid carbonoside	3682-03-9	B	56739	62634	64496	50185	49024	48521	23829	26593	21835
pmp000237	579.13	283.06	578.127	C26H26O15	[M+H]+	Apigenin-6-C-(2''-glucuronyl)xyloside	Flavonoid carbonoside	-	B	737770	614900	605200	549380	493680	500010	304840	293090	319100
pme3227	579.17	433	578.164	C27H30O14	[M+H]+	Vitexin-2''-O-rhamnoside	Flavonoid carbonoside	64820-99-1	B	68440	66646	78754	68322	56919	73279	33463	34163	40398
pmb0665	611.16	465.1	610.153	C27H30O16	[M+H]+	Orientin-7-O-glucoside	Flavonoid carbonoside	-	B	632780	484030	516280	16060	18863	13092	987950	909120	922640
pmb0618	627.19	465.1	626.185	C28H34O16	[M+H]+	Hesperetin-8-C-glucoside-3'-O-glucoside	Flavonoid carbonoside	-	B	477290	518820	479360	6418800	5924300	6001500	5370000	4786200	5058500
pme3285	275.09	139	274.084	C15H14O5	[M+H]+	Afzelechin (3,5,7,4'-Tetrahydroxyflavan)	Flavanols	2545-00-8	A	817820	860010	679370	1854100	1722900	1465800	39073	70743	50076
pme0460	291.09	139.04	290.079	C15H14O6	[M+H]+	Epicatechin*	Flavanols	490-46-0	A	6232800	6392300	6013000	5193000	5270500	4966900	1800500	1944000	1996100
mws0054	289.07	245	290.079	C15H14O6	[M-H]-	Catechin*	Flavanols	154-23-4	A	1658100	1544000	1415200	303520	245370	280040	414940	400860	351890
mws0049	307.08	139	306.074	C15H14O7	[M+H]+	Gallocatechin	Flavanols	970-73-0	B	9	9	9	128070	118080	139050	27426	31206	21434
mws1397	441.08	169	442.09	C22H18O10	[M-H]-	Epicatechin gallate	Flavanols	1257-08-5	B	3504.8	1503.8	4991.2	5005.8	5506.2	9502.5	4488	1501.5	4478.8
pmn001415	451.1	341.06	452.111	C24H20O9	[M-H]-	Catechin-(7,8-bc)-4β-(3,4-dihydroxyphenyl)-dihydro-2-(3H)-one*	Flavanols	-	A	19767000	21187000	15484000	11455000	10290000	10678000	11741000	11114000	12688000
pmn001416	451.1	341.06	452.111	C24H20O9	[M-H]-	Catechin-(7,8-bc)-4α-(3,4-dihydroxyphenyl)-dihydro-2-(3H)-one*	Flavanols	-	A	873290	897870	898530	803640	930170	815970	517230	566870	619970
HJN041	451.12	289.07	452.131	C21H24O11	[M-H]-	Epicatechin glucoside	Flavanols	-	B	321210	295860	292170	755630	620780	650780	134540	108130	150270
pma0791	521	273	520.122	C24H24O13	[M+H]+	Naringenin-7-O-(6''-malonyl)glucoside	Flavanols	-	B	90272	93015	92205	41650	36032	41337	43007	40992	38381
pmb3114	561.14	289.2	562.148	C30H26O11	[M-H]-	Epicatechin-epiafzelechin	Flavanols	-	A	251800	258510	257150	171800	229300	198470	86908	68643	103710
mws0097	357.13	151	358.142	C20H22O6	[M-H]-	Pinoresinol	Lignans	487-36-5	B	13905	12772	13380	44338	33967	31999	25504	23036	19932
Hmcn002743	417.15	181.04	418.162	C22H26O8	[M-H]-	Lirioresinol A	Lignans	21453-71-4	B	97846	106450	120730	14883	12273	12380	11278	12172	11875
pmn001378	519.19	357.14	520.194	C26H32O11	[M-H]-	Pinoresinol-4-O-glucoside	Lignans	41607-20-9	B	192680	208960	192870	249590	230730	293630	136410	138110	146460
HJN083	521.2	359.15	522.211	C26H34O11	[M-H]-	Lariciresinol-4'-O-glucoside	Lignans	143663-00-7	B	167470	178190	196010	30071	25520	52451	28096	14813	25267
Rfmb25702	561.2	357.13	562.205	C28H34O12	[M-H]-	Pinoresinol-4-O-(6''-acetyl)glucoside	Lignans	-	B	7865	6879.1	9111.8	6386.2	5641	6992.6	989	1336.2	2431.5
Lmqn001932	579.21	417.16	580.216	C28H36O13	[M-H]-	Syringaresinol-4'-O-glucoside	Lignans	7374-79-0	B	9	9	9	9	9	9	27980	31580	34038
Rfmb26201	621.22	417.16	622.226	C30H38O14	[M-H]-	Syringaresinol-4'-O-(6''-acetyl)glucoside	Lignans	-	B	58548	62289	70212	38846	35148	35353	40714	37778	32901
Hmjp002337	193.04	133.03	192.033	C10H8O4	[M+H]+	Isoscopoletin (6-Hydroxy-7-Methoxycoumarin)	Coumarins	776-86-3	B	98550	112380	121490	127440	136900	147370	231610	243120	206940
pmp000021	287.09	203.04	286.084	C16H14O5	[M+H]+	Isooxypeucedanine	Coumarins	5058-15-1	B	66550	40059	44201	114850	64200	64933	187380	158480	166060
mws1015	339.07	177	340.079	C15H16O9	[M-H]-	Esculin (6,7-DihydroxyCoumarin-6-glucoside)	Coumarins	531-75-9	A	282310	277840	294730	831150	677960	678740	404490	421020	377440
mws1077	355.1	193.05	354.095	C16H18O9	[M+H]+	Scopoletin-7-O-glucoside (Scopolin)	Coumarins	531-44-2	B	409850	481390	411120	338250	430580	350250	179760	188500	131960
Lmgp003270	369.16	177.06	368.074	C16H16O10	[M+H]+	Scopoletin-7-O-glucuronide	Coumarins	132752-65-9	B	4345100	4550700	4370400	2577400	2870600	2769100	5834200	6303800	6332600
Lmbp002255	371.1	209.05	370.09	C16H18O10	[M+H]+	Fraxetin-8-O-glucoside (Fraxin)	Coumarins	524-30-1	B	7788.6	8931.3	7805.6	20992	9876.4	23022	23042	17373	29455
Lmbp003208	385.12	223.06	384.106	C17H20O10	[M+H]+	Fraxidin-8-O-glucoside	Coumarins	-	B	18025	28712	23881	502780	398250	463790	121940	101520	110530
pmb0764	144.05	113.2	143.04	C6H9NOS	[M+H]+	4-Methyl-5-thiazoleethanol	Others	137-00-8	B	36448	36136	38911	35291	34613	32195	16117	18905	15731
Cmyp007180	181.12	107.09	180.115	C11H16O2	[M+H]+	Dihydroactinidiolide	Others	17092-92-1	B	117720	116780	117750	287030	291640	281010	306560	312630	310020
Hmln002597	193.05	161.02	216.04	C10H9NaO4	[M-Na]-	Sodium ferulate	Others	24276-84-4	B	11002	13851	15021	28249	27248	21528	11789	8673.6	11072
mws1038	277.12	146	278.13	C11H22N2O4S	[M-H]-	Pantetheine	Others	496-65-1	B	4265.2	7711.7	3460.4	10888	11182	5379.7	9263.6	12395	9432.1
Hmyn000254	297.12	59.01	298.12	C18H18O4	[M-H]-	Tababiphenyl C	Others	1644433-50-0	B	56069	39686	57316	115790	82224	90250	106420	75235	102300
Zmtn001661	315.11	153.02	316.116	C14H20O8	[M-H]-	Vanilloloside	Others	74950-96-2	B	2499200	2369600	2498800	8289700	7667000	7301400	4273300	4339100	4416000
Lmtn002233	327.11	165.06	328.116	C15H20O8	[M-H]-	Androsin	Others	531-28-2	A	240850	216590	211300	449760	421180	402720	575260	606250	616450
Hmln003529	401.15	269.11	402.152	C18H26O10	[M-H]-	Benzyl β-primeveroside	Others	130622-31-0	B	147850	142930	142020	99386	74988	87291	167840	172210	111760
Zmyn000268	89.02	71.02	90.032	C3H6O3	[M-H]-	2,3-Dihydroxypropanal	Saccharides and Alcohols	56-82-6	B	18829	22221	13518	16825	13647	6204.5	7127.3	11664	11173
Lmlp001319	91.09	55.05	90.068	C4H10O2	[M+H]+	2,3-Butanediol	Saccharides and Alcohols	513-85-9	B	4493.9	1785.6	2142.7	10639	11295	4055.3	9821.3	12119	9944.5
pma0134	121.04	93.06	120.042	C4H8O4	[M+H]+	D-(-)-Threose	Saccharides and Alcohols	95-43-2	B	35624	41958	28338	68397	71546	82449	172940	163300	151000
mws0889	135.03	75.01	136.037	C4H8O5	[M-H]-	D-Threonic Acid	Saccharides and Alcohols	3909-12-4	B	712310	763280	749660	683780	839660	648280	1168600	1093500	1204800
ML10171848	147.03	85.03	148.037	C5H8O5	[M-H]-	D-Arabinono-1,4-lactone	Saccharides and Alcohols	2782-09-4	A	1104200	1137200	1332900	1690800	1632400	1806900	944400	964550	1022500
mws1499	149.05	59.01	150.053	C5H10O5	[M-H]-	D-Arabinose	Saccharides and Alcohols	10323-20-3	A	151370	175720	123650	128270	121470	132660	181060	132830	178530
Zmgn000173	149.05	75.01	150.053	C5H10O5	[M-H]-	D-Ribose	Saccharides and Alcohols	50-69-1	A	6874.3	7738.8	5041.7	11912	3519.7	4259.8	7029	5517.9	6760.2
mws0437	151.06	71	152.068	C5H12O5	[M-H]-	D-Arabitol*	Saccharides and Alcohols	488-82-4	A	17197	19091	27784	24550	20540	28803	18709	22047	18209
pme0513	151.06	59	152.068	C5H12O5	[M-H]-	Xylitol*	Saccharides and Alcohols	87-99-0	A	9612.5	14434	14655	21007	18860	12652	10895	10508	15466
mws0213	151.06	71	152.068	C5H12O5	[M-H]-	Ribitol*	Saccharides and Alcohols	488-81-3	A	21511	24915	27667	23743	19742	28631	22797	16101	19117
pmf0174	157.16	157.2	158.167	C10H22O	[M-H]-	1-Decanol	Saccharides and Alcohols	112-30-1	B	2145900	2286000	2337800	2445100	2540900	2448200	1478300	1477600	1537400
pme2529	163.2	101	164.068	C6H12O5	[M-H]-	1,5-Anhydro-D-glucitol	Saccharides and Alcohols	154-58-5	B	53297	77391	47812	71467	77595	59989	95388	79719	77837
Zmzn000078	168.99	78.96	169.998	C3H7O6P	[M-H]-	Dihydroxyacetone phosphate	Saccharides and Alcohols	57-04-5	B	159340	46201	51848	81890	108640	34119	40380	51222	41979
mws4175	175.02	85.03	176.032	C6H8O6	[M-H]-	D-Glucurono-6,3-lactone	Saccharides and Alcohols	32449-92-6	A	14720	8520.3	9475.9	8710.9	8344.1	7267.9	10507	9391.7	12221
pme1021	177.14	99	178.048	C6H10O6	[M-H]-	D-Glucono-1,5-lactone	Saccharides and Alcohols	90-80-2	B	3580.1	4958.8	7318	3823.5	6591.9	6048.2	12994	9395.7	14178
pmb0786	180.09	163.06	179.079	C6H13NO5	[M+H]+	D-Glucosamine	Saccharides and Alcohols	3416-24-8	B	147480	125420	104830	161100	98903	134470	128970	205120	160270
mws4170	179.06	59.01	180.063	C6H12O6	[M-H]-	D-Glucose*	Saccharides and Alcohols	14431-43-7	A	4295300	4318700	3387300	3074800	4499900	5373600	6280200	4942200	7701800
mws1164	179.06	59.01	180.063	C6H12O6	[M-H]-	D-Fructose*	Saccharides and Alcohols	7660-25-5	A	5260400	3878000	4114900	3580200	3339500	3533700	7504800	5645300	9455100
pmf0139	179.06	59	180.063	C6H12O6	[M-H]-	D-Galactose*	Saccharides and Alcohols	59-23-4	A	3920900	3785300	3437700	4131000	4723500	3678200	6025100	5239900	6190700
Hmln000297	179.05	59.01	180.063	C6H12O6	[M-H]-	Inositol*	Saccharides and Alcohols	87-89-8	A	3465100	3457300	4260400	3894200	4766700	4415100	6676300	8213200	8530400
pmf0138	179.06	59	180.063	C6H12O6	[M-H]-	D-Mannose*	Saccharides and Alcohols	3458-28-4	A	3789000	3703200	5135800	3357600	4751500	4154500	7512600	7202200	7898100
mws1155	181.07	101.02	182.079	C6H14O6	[M-H]-	D-Mannitol*	Saccharides and Alcohols	69-65-8	A	874160	1155100	1118300	2055100	2544300	2253800	1319400	1190300	1416300
pme2237	181.07	101	182.079	C6H14O6	[M-H]-	Dulcitol*	Saccharides and Alcohols	608-66-2	A	913150	1062400	1085200	1909000	2300500	2533800	1301500	1042500	1401500
mws0214	181.07	71	182.079	C6H14O6	[M-H]-	D-Sorbitol*	Saccharides and Alcohols	50-70-4	A	3665000	4504400	3987300	7551700	9443700	9678700	5486000	4460600	5134900
Zmgn000447	184.98	78.96	185.993	C3H7O7P	[M-H]-	3-Phospho-D-glyceric acid	Saccharides and Alcohols	820-11-1	B	60271	61378	58223	68129	66547	65289	42422	50279	66876
pmf0348	187.13	97	188.141	C10H20O3	[M-H]-	2,6-Dimethyl-7-octene-2,3,6-triol	Saccharides and Alcohols	73815-21-1	B	26153	19960	25560	36685	33164	35577	69833	84316	64889
pme3705	193.04	73	194.043	C6H10O7	[M-H]-	D-Glucoronic acid*	Saccharides and Alcohols	6556-12-3	A	300390	383940	365070	396290	311280	394300	419870	436730	408400
mws2104	193.07	99.01	194.079	C7H14O6	[M-H]-	D-Pinitol	Saccharides and Alcohols	10284-63-6	B	175790	215850	208840	178760	168190	192050	246490	201210	216420
pme0534	195.05	74.9	196.058	C6H12O7	[M-H]-	Gluconic acid	Saccharides and Alcohols	526-95-4	A	652710	791810	637790	1046500	1120900	954760	1111300	1131600	1243000
Zmzn000079	199	78.96	200.009	C4H9O7P	[M-H]-	D-Erythrose-4-phosphate	Saccharides and Alcohols	585-18-2	B	5218.4	7187.4	7816.8	10888	7852.9	12113	10408	7978.4	10053
pme1261	206.14	76	205.131	C9H19NO4	[M+H]+	D-Panthenol	Saccharides and Alcohols	81-13-0	B	3284.4	1991.2	3743	3299.8	3975.8	6149.6	12287	6769	5011.5
Zmyn000108	209.03	85.03	210.038	C6H10O8	[M-H]-	D-Saccharic acid*	Saccharides and Alcohols	87-73-0	B	13619	9725.6	10931	9310.9	11788	9101.7	12071	17222	14135
Zmpn000199	209.03	85.03	210.038	C6H10O8	[M-H]-	D-Galactaric acid*	Saccharides and Alcohols	526-99-8	B	156970	171070	156230	240550	243300	247740	149060	151190	132840
Hmcn000192	209.07	59.01	210.073	C7H14O7	[M-H]-	Sedoheptulose*	Saccharides and Alcohols	3019-74-7	B	151450	181770	178360	211310	165700	181320	174510	161400	215590
pme2755	222	144	221.09	C8H15NO6	[M+H]+	N-Acetyl-D-glucosamine*	Saccharides and Alcohols	7512-17-6	A	168410	163620	150760	167240	181380	168890	111490	155010	140080
mws4174	222.1	138	221.09	C8H15NO6	[M+H]+	N-Acetyl-D-mannosamine*	Saccharides and Alcohols	7772-94-3	A	394510	385450	381240	428850	377080	349450	68892	68323	54701
mws2608	222.1	84.05	221.09	C8H15NO6	[M+H]+	N-Acetyl-D-galactosamine*	Saccharides and Alcohols	1811-31-0	A	246690	268730	248250	297520	316330	306480	73834	93757	88134
Zmyn000110	258.04	78.96	259.046	C6H14NO8P	[M-H]-	D-Glucosamine 1-phosphate	Saccharides and Alcohols	2152-75-2	B	9	9	9	13413	10619	13210	26393	27614	19275
pme3313	259	97	260.03	C6H13O9P	[M-H]-	D-Fructose 6-phosphate*	Saccharides and Alcohols	643-13-0	A	1735600	1585300	1887000	1569800	1520500	2026100	2074700	1603800	1671200
mws0866	259.02	97	260.03	C6H13O9P	[M-H]-	D-Glucose 6-phosphate*	Saccharides and Alcohols	56-73-5	A	1658700	2139500	1315000	1838700	1754400	1754500	1745000	1908200	1661200
mws1090	259.02	97	260.03	C6H13O9P	[M-H]-	Glucose-1-phosphate*	Saccharides and Alcohols	59-56-3	A	1311500	1763600	1510700	1546900	1721000	1973300	1199600	1292600	1700900
Zmpn000095	261.04	78.96	262.045	C6H15O9P	[M-H]-	Sorbitol-6-phosphate	Saccharides and Alcohols	20479-58-7	B	42074	43412	49675	76781	66221	88208	46819	51988	47028
pmb3081	289	97	290.004	C6H11PO11	[M-H]-	Glucarate O-Phosphoric acid*	Saccharides and Alcohols	-	B	1017400	756740	543910	1349200	859240	421850	709090	1064900	1394700
pme3163	289	97	290.04	C7H15O10P	[M-H]-	D-Sedoheptuiose 7-phosphate*	Saccharides and Alcohols	2646-35-7	B	1227600	1175700	1012500	1835900	1694000	1744100	1329900	1117400	1119800
pmf0314	289.25	157	290.261	C20H34O	[M-H]-	(+)-cis-Abienol	Saccharides and Alcohols	17990-16-8	B	4475.6	2488.5	3362.7	4048.9	4281.7	6132.8	4665	3639	3588
Lmqp006559	330.34	312.33	329.327	C20H43NO2	[M+H]+	2-Amino-1,3-eicosanediol	Saccharides and Alcohols	-	A	994140	869010	1066500	1080600	1019300	973660	948270	1005600	1008300
Lmqn000432	333.06	333.06	334.067	C9H19O11P	[M-H]-	1-(sn-Glycero-3-phospho)-1D-myo-inositol	Saccharides and Alcohols	-	A	615620	528850	369850	224820	202630	254530	171370	203840	297580
Zmyn000083	338.99	78.96	339.996	C6H14O12P2	[M-H]-	D-Glucose 1,6-bisphosphate	Saccharides and Alcohols	10139-18-1	B	18477	15710	14258	16303	14058	12520	13583	11170	12231
mws5038	341.11	89.02	342.116	C12H22O11	[M-H]-	Isomaltulose*	Saccharides and Alcohols	13718-94-0	A	3061800	8059900	6179700	5842400	6197600	7189400	5806500	6231800	6686800
mws1333	341.11	113	342.116	C12H22O11	[M-H]-	Melibiose*	Saccharides and Alcohols	585-99-9	A	2732700	1938400	2720700	4009200	2817600	2187500	2799300	2951600	2427900
Lmsn000381	341.11	89.02	342.116	C12H22O11	[M-H]-	D-Maltose*	Saccharides and Alcohols	133-99-3	A	6323000	4619000	6128000	5544400	8671300	9641600	5588800	6126400	9688500
mws0264	341.11	119	342.116	C12H22O11	[M-H]-	D-Trehalose*	Saccharides and Alcohols	99-20-7	A	3490000	4395200	3280700	6049700	2159300	2941300	2713600	3574500	5711000
mws1080	341.11	179	342.116	C12H22O11	[M-H]-	Galactinol*	Saccharides and Alcohols	3687-64-7	A	869190	870530	1146800	1261700	1385000	978630	955670	1147500	1821000
pme0519	341.11	119.03	342.116	C12H22O11	[M-H]-	D-Sucrose*	Saccharides and Alcohols	57-50-1	A	3265800	2725500	4133500	3503100	3851500	5031200	3063600	2787600	3740700
MA10039641	341.11	89.02	342.116	C12H22O11	[M-H]-	Lactobiose*	Saccharides and Alcohols	63-42-3	A	6144300	3302400	6998600	6938000	5053200	10457000	7016500	6813800	8635300
mws5040	365.11	203.05	364.078	C12H21O11Na	[M+H]+	Turanose	Saccharides and Alcohols	547-25-1	A	3624000	4129200	4284000	3731500	4790800	5846200	3236500	4819900	4489500
mws2523	421.08	241.1	422.083	C12H23O14P	[M-H]-	Trehalose 6-phosphate	Saccharides and Alcohols	4484-88-2	B	61118	69340	56305	63608	66144	100410	41364	84700	63896
Lmmn000214	487.17	341.11	488.174	C18H32O15	[M-H]-	Solatriose	Saccharides and Alcohols	528-40-5	B	9818.2	7564.9	14611	31097	15868	14024	2872.9	4170.7	8275.6
pme2125	503.16	179	504.169	C18H32O16	[M-H]-	Raffinose*	Saccharides and Alcohols	512-69-6	B	124980	213970	121710	458870	211900	398310	256070	179820	431430
pme0500	503.16	323	504.169	C18H32O16	[M-H]-	D-Melezitose	Saccharides and Alcohols	597-12-6	B	18683	20706	27442	42477	18380	34376	46092	65708	47201
mws1589	503.16	179	504.169	C18H32O16	[M-H]-	D-Panose*	Saccharides and Alcohols	33401-87-5	B	35840	34178	29727	82366	28599	79265	62446	106660	92669
Hmqp000191	505.18	127.03	504.17	C18H32O16	[M+H]+	Planteose	Saccharides and Alcohols	470-57-5	A	126430	138000	157570	187030	141280	176780	212790	218450	262300
mws1593	665.21	161	666.222	C24H42O21	[M-H]-	D-Maltotetraose	Saccharides and Alcohols	34612-38-9	B	6473.4	1056.1	8505.3	9604.8	6545.4	8177.1	6812.4	5280.1	6253.7
Lmqn000213	665.21	341.11	666.222	C24H42O21	[M-H]-	Stachyose	Saccharides and Alcohols	470-55-3	B	5461.6	7325	4345.9	15157	9033.3	9998	18320	22028	19516
mws0133	123.06	80.05	122.048	C6H6N2O	[M+H]+	Nicotinamide	Vitamin	98-92-0	B	27886	30881	28313	33280	23986	30592	21772	27192	24491
pme2165	155.01	111	156.017	C5H4N2O4	[M-H]-	Orotic acid	Vitamin	65-86-1	B	55631	86012	49385	463620	550920	535220	56449	80513	63466
Zmjp000624	168.06	150.05	167.058	C8H9NO3	[M+H]+	Pyridoxal	Vitamin	66-72-8	B	7670.8	8994.6	6497	14991	8462.3	11933	11114	12528	15231
pme1383	170.08	134.1	169.074	C8H11NO3	[M+H]+	Pyridoxine	Vitamin	65-23-6	B	40599	38595	35979	28688	20689	25718	63146	53480	68251
pme2596	184.06	148	183.053	C8H9NO4	[M+H]+	4-Pyridoxic acid	Vitamin	82-82-6	B	45713	56532	42530	44412	36934	39839	85643	82407	90885
mws1337	220.12	202.1	219.111	C9H17NO5	[M+H]+	D-Pantothenic Acid	Vitamin	79-83-4	A	263740	256110	260970	357870	397450	398270	155200	142780	130060
pme2266	245.1	227	244.088	C10H16N2O3S	[M+H]+	Biotin	Vitamin	58-85-5	B	25555	37295	32386	28867	39444	25867	42542	45091	43336
pma3101	256.2	124.1	256.082	C11H14NO6+	[M+H]+	Nicotinate D-ribonucleoside	Vitamin	17720-18-2	B	185670	193940	164040	213690	205330	233300	607990	519990	551250
pma1751	286.09	124	285.085	C12H15NO7	[M+H]+	N-(beta-D-Glucosyl)nicotinate	Vitamin	-	B	695680	654280	630200	654610	608320	656200	172710	175490	159280
pme2289	287.2	119	286.23	C20H30O	[M+H]+	Retinol (Vitamin A1)	Vitamin	68-26-8	B	9	9	9	4185.2	1342.2	2861.9	1505.6	2471.5	2922
pme3511	287.05	243	288.059	C10H12N2O8	[M-H]-	Orotidine	Vitamin	314-50-1	B	2515.5	3146	1062.1	2775.5	4414.1	4402.9	4491.8	7080.1	5213.5
pmb0789	332.13	152.07	331.127	C14H21NO8	[M+H]+	Pyridoxine-5'-O-glucoside	Vitamin	-	B	187650	188410	194240	162160	137740	137030	299140	293450	268360
mws0232	377.15	243.09	376.138	C17H20N4O6	[M+H]+	Riboflavin (Vitamin B2)	Vitamin	83-88-5	B	45070	48095	59032	92090	75677	109500	49899	49474	55926
pme1014	445.3	341.3	444.303	C31H40O2	[M+H]+	Menatetrenone (Vitamin K2)	Vitamin	11032-49-8	B	410260	358640	363980	336000	344190	381320	314500	436660	343940
Zmhn001970	389.12	227.08	390.131	C20H22O8	[M-H]-	Piceid	Stilbene	27208-80-6	B	279260	258830	329400	115530	154180	71874	175670	190950	185830
pmn001394	405.12	243.1	406.126	C20H22O9	[M-H]-	2,3,5,4'-Tetrahydroxystilbene-2-O-glucoside	Stilbene	-	B	7513100	6235800	8138800	5537500	6886200	6010500	11279000	13458000	13114000
pma6625	405.13	243.06	406.126	C20H22O9	[M-H]-	E-3,4,5'-Trihydroxy-3'-glucosylstilbene	Stilbene	-	B	17287	22739	26978	15221	26445	20513	102870	89501	93941
Zmhn001746	405.12	243.07	406.127	C20H22O9	[M-H]-	Piceatannol-3'-O-glucoside	Stilbene	94356-26-0	B	7300100	7311200	7011300	7242200	6394500	6365700	13851000	13498000	14428000
mws0024	169.01	125	170.022	C7H6O5	[M-H]-	Gallic acid	Tannin	149-91-7	B	54305	53283	49687	24157	16570	18038	10422	14067	11364
pmn001518	331.07	169.01	332.074	C13H16O10	[M-H]-	1-O-Galloyl-D-glucose	Tannin	58511-73-2	B	673430	683230	682180	956160	1118000	1021000	530680	514300	571380
Lmfn000604	331.07	169.01	332.074	C13H16O10	[M-H]-	6-O-Galloyl-D-glucose*	Tannin	13186-19-1	A	3463600	3223700	3553100	6422100	6202900	6466100	3675800	3567600	3568400
Hmln000659	331.07	169.01	332.075	C13H16O10	[M-H]-	3-O-Galloyl-D-glucose*	Tannin	-	A	4010400	3704100	3854200	6566400	6754900	6992100	4221400	3693300	3934300
Hmln000873	331.07	169.01	332.075	C13H16O10	[M-H]-	2-O-Galloyl-D-glucose	Tannin	-	B	726440	805000	760920	1039300	1087100	1023800	573300	643470	566640
Cmsn000894	361.08	211.03	362.084	C14H18O11	[M-H]-	7-O-Galloyl-D-sedoheptulose	Tannin	-	B	29352	27546	29451	15536	18413	14746	12158	9455.2	11231
Hmln003405	447.06	315.01	448.064	C20H16O12	[M-H]-	Ellagic acid-4-O-rhamnoside	Tannin	-	B	78754	50689	53865	115920	100960	89932	19628	20523	34037
Hmdn001667	463.05	300.99	464.06	C20H16O13	[M-H]-	Ellagic acid-4-O-glucoside	Tannin	-	B	139740	121350	110080	9	9	9	68321	42326	51391
pmp000275	581.17	139.04	580.158	C30H28O12	[M+H]+	Gambiriin A1	Tannin	76250-49-2	B	264900	269850	322400	196230	188220	179900	105980	131600	81757
HJN043	863.19	711.14	864.19	C45H36O18	[M-H]-	Cinnamtannin B1	Tannin	88082-60-4	B	222230	188010	164730	121990	130620	71534	101490	119860	86542
pme0432	575.12	285.01	576.127	C30H24O12	[M-H]-	Procyanidin A2	Proanthocyanidins	41743-41-3	B	55569	47338	33384	41438	52710	47430	20923	29812	29749
mws0836	577.14	425.1	578.142	C30H26O12	[M-H]-	Procyanidin B1	Proanthocyanidins	20315-25-7	A	2006500	2037500	1599400	572660	592890	631530	1074800	1171200	928070
pmn001667	577.14	407.1	578.142	C30H26O12	[M-H]-	Procyanidin B4	Proanthocyanidins	29106-51-2	A	8210000	8103500	8821900	7008300	7526900	7381700	3295000	3469900	3541100
pme0436	577.14	407.1	578.142	C30H26O12	[M-H]-	Procyanidin B3	Proanthocyanidins	23567-23-9	A	3138200	3325900	2549700	1134600	972200	1038900	1829600	1768500	1813500
pme0434	577.14	407.1	578.142	C30H26O12	[M-H]-	Procyanidin B2	Proanthocyanidins	29106-49-8	A	11533000	13663000	12869000	10837000	8388200	11149000	7961200	7231600	7401800
HJN074	591.15	289.07	592.158	C31H28O12	[M-H]-	Procyanidin A6	Proanthocyanidins	-	B	123700	113280	116290	136620	111840	134090	40880	38759	43630
pmn001647	865.2	713.2	866.206	C45H38O18	[M-H]-	Procyanidin C2	Proanthocyanidins	37064-31-6	A	1431400	1707400	1803000	1388400	1254600	1300800	1057600	1020500	1207300
pmn001646	865.2	577.1	866.206	C45H38O18	[M-H]-	Procyanidin C1	Proanthocyanidins	37064-30-5	A	7616100	6930700	8006100	6702500	5833000	5712200	4846800	4812200	4619400
pme2292	89.11	72.08	88.1	C4H12N2	[M+H]+	Putrescine	Phenolamine	110-60-1	B	70996	79510	72131	36214	65126	59186	55814	61338	49586
pme1841	103.12	86.1	102.116	C5H14N2	[M+H]+	Cadaverine	Phenolamine	462-94-2	B	3832.5	3293.9	2653.7	25825	26539	31066	7070	6849.9	7802.9
pme2693	131.12	114.09	130.111	C6H14N2O	[M+H]+	N-Acetylputrescine*	Phenolamine	18233-70-0	B	5205.2	8537.6	3219.3	10215	17338	19005	8310.9	3270.3	2469.6
pmb0501	131.13	114.1	130.122	C5H14N4	[M+H]+	Agmatine*	Phenolamine	306-60-5	B	7987.3	7918.4	5852.6	12738	8208.2	14488	5182.5	3664.8	6521.3
mws0018	203.22	83	202.216	C10H26N4	[M+H]+	Spermine	Phenolamine	71-44-3	B	9170200	9074700	9642900	8765100	8809200	9219700	6915300	7406600	7700200
pmp001252	284.13	147.04	283.121	C17H17NO3	[M+H]+	p-Coumaroyltyramine	Phenolamine	36417-86-4	B	8937	10260	11594	10670	10379	11266	4994.7	7233.1	5932.8
pmb0770	353.15	177.1	352.142	C20H20N2O4	[M+H]+	N-Feruloylserotonin	Phenolamine	68573-23-9	B	8083.1	6927.5	5132.2	13288	12049	9608.1	2197.1	2915.4	4538.2
pmb0503	439.22	147.04	438.211	C20H30N4O7	[M+H]+	N-(4'-O-glycosyl)-p-coumaroyl agmatine	Phenolamine	-	B	10495	17153	13806	13690	12294	15292	10717	10151	4174.8
pma0702	558.28	207.07	557.274	C29H39N3O8	[M+H]+	N1,N8-Bis(sinapoyl)spermidine	Phenolamine	-	B	754670	689680	707630	594670	549060	588320	252730	281470	317190
NK10246260	162.06	116.05	161.048	C9H7NO2	[M+H]+	2,4-Dihydroxyquinoline	Quinoline alkaloids	86-95-3	B	8006.7	1972.1	6230.6	15671	12393	13257	12892	8250.2	12669
pme3005	74.05	46.2	73.053	C3H7NO	[M+H]+	N,N-Dimethylformamide	Alkaloids	68-12-2	B	99791	131090	98342	92555	91987	69100	115850	92110	66972
pmb0782	86.1	69.2	85.089	C5H11N	[M+H]+	Piperidine	Alkaloids	110-89-4	B	101640	87292	93819	166660	167660	158540	87345	94588	100960
pmb0484	104.1	60.1	103.091	C5H13NO	[M+H]+	Choline	Alkaloids	62-49-7	A	593650	478190	503400	1015100	856680	1012600	557050	487900	615650
pme2433	106.09	88	105.079	C4H11NO2	[M+H]+	Diethanolamine	Alkaloids	111-42-2	B	107610	129010	96873	132610	109360	116280	96434	80798	85952
mws0191	118.09	59	117.079	C5H11NO2	[M+H]+	Betaine	Alkaloids	107-43-7	B	273340	248310	254820	471440	449720	399280	435030	264150	307030
mws0491	122.1	105	121.089	C8H11N	[M+H]+	Phenethylamine	Alkaloids	64-04-0	B	14914	19187	20035	32981	36813	29872	21837	23834	23789
mws0982	126.1	68	125.095	C6H11N3	[M+H]+	1-Methylhistamine	Alkaloids	501-75-7	B	12320	12028	11713	16417	9912.4	8207.9	18653	13960	13386
pma3649	132.1	86.1	131.058	C5H9NO3	[M+H]+	5-Aminolevulinate	Alkaloids	106-60-5	B	183000	105990	132040	292940	158330	364880	159220	150350	164030
pmp001198	132.1	57.1	131.095	C6H13NO2	[M+H]+	6-Deoxyfagomine	Alkaloids	197449-09-5	A	154470	124660	120310	197410	210330	208200	151720	147110	133060
HJKP000649	136.07	91.05	135.068	C8H9NO	[M+H]+	N-benzylformamide	Alkaloids	6343-54-0	B	36661	36252	35090	51127	54192	58978	69144	61274	63213
pme2268	138.05	94.07	137.048	C7H7NO2	[M+H]+	Trigonelline	Alkaloids	535-83-1	B	18549	6347.8	9014.8	8694.8	5289.1	5673.1	28647	18587	22656
mws0146	138.05	78	137.048	C7H7NO2	[M+H]+	Nicotinic Acid Methyl Ester(Methyl Nicotinate)	Alkaloids	93-60-7	B	6130.5	7845.8	5758.8	8510.9	9082.1	7880.6	5231.6	3697.3	5965
pme1137	140.03	94	139.027	C6H5NO3	[M+H]+	6-Hydroxynicotinic acid	Alkaloids	5006-66-6	B	19821	22336	15664	40499	47407	49293	9	4484.5	9
mws0704	140.01	78.96	141.019	C2H8NO4P	[M-H]-	O-Phosphorylethanolamine	Alkaloids	1071-23-4	B	22343	27644	21633	26041	31708	32110	10946	8917.2	11778
pma2987	142.1	124.09	141.09	C6H11N3O	[M+H]+	Histidinol	Alkaloids	501-28-0	B	7826900	7542900	7327000	7898400	7831400	8006500	6340200	6406200	6026600
pme1691	147.13	87.2	146.118	C7H16NO2	[M+H]+	Acetylcholine	Alkaloids	60-31-1	A	564460	484780	591570	823840	683170	688970	527700	409810	458870
Lmgp000796	150.06	61.01	149.048	C8H7NO2	[M+H]+	4-Hydroxymandelonitrile	Alkaloids	13093-65-7	B	146750	172140	144570	88940	100220	84521	88418	82191	83441
mws1346	162.08	98	161.069	C6H11NO4	[M+H]+	DL-2-Aminoadipic acid	Alkaloids	542-32-5	B	55666	58282	39526	88589	71589	74397	40940	39573	39206
pmb1754	184	125	184.073	C5H15NO4P+	[M]+	O-Phosphocholine	Alkaloids	107-73-3	B	47092	47894	54440	93029	55904	90036	100590	69644	70560
pmb1912	474.17	327	473.166	C20H23N7O7	[M+H]+	10-Formyltetrahydrofuran	Alkaloids	2800-34-2	B	181860	178230	173920	305580	259500	269340	152730	111640	142020
pme2836	178.09	160	177.079	C10H11NO2	[M+H]+	5-Hydroxytryptophol	Plumerane	154-02-9	B	15096	11914	11249	10610	18495	15723	10878	19485	16480
pmb0818	206.1	147.5	205.074	C11H11NO3	[M+H]+	Methoxyindoleacetic acid	Plumerane	3471-31-6	B	9105.6	9421	10779	20812	19979	20663	7674.6	10208	6496.1
pme1453	233.13	159	232.121	C13H16N2O2	[M+H]+	Melatonin (N-Acetyl-5-methoxytryptamine)	Plumerane	73-31-4	B	68028	53894	63221	11453	23909	14498	94141	100150	101880
Lmqp012453	441.37	191.18	440.365	C30H48O2	[M+H]+	Ursolaldehyde	Triterpene	-	B	55330	35144	50233	58216	52535	59544	68204	100060	87751
Lmzn106829	453.34	453.34	454.345	C30H46O3	[M-H]-	Betulonic acid	Triterpene	4481-62-3	B	29629	17775	31760	62401	51731	37239	62428	60682	55710
pmp000263	455.35	409.35	454.345	C30H46O3	[M+H]+	Sanguisorbigenin	Triterpene	-	A	82701	96358	68873	154630	139010	211910	99104	83626	89041
Lmzn206829	453.34	453.34	454.345	C30H46O3	[M-H]-	Oleanonic acid	Triterpene	17990-42-0	B	21748	20050	18016	43987	29472	32605	39044	34873	63610
Lmzn006795	453.34	453.34	454.345	C30H46O3	[M-H]-	Ursonic acid	Triterpene	6246-46-4	B	20002	14900	19598	38896	38745	30202	42153	40158	56635
HJN110	455.36	455.36	456.36	C30H48O3	[M-H]-	Betulinic acid	Triterpene	472-15-1	A	8666600	9985700	9460100	6000100	5211900	4465400	4621300	4772700	4939700
mws4053	455.35	455.35	456.36	C30H48O3	[M-H]-	Ursolic acid	Triterpene	77-52-1	B	2660500	2400800	2373600	2233000	2074000	1908500	3452900	3075800	2523700
Lmsn013282	469.33	407.33	470.34	C30H46O4	[M-H]-	Pomonic Acid	Triterpene	13849-90-6	A	33468	30785	30502	70550	66865	62142	90699	85698	86460
pmp000441	471.35	453.34	470.34	C30H46O4	[M+H]+	11-Keto-ursolic acid	Triterpene	105870-59-5	A	25630	22668	28304	166630	128980	156040	136200	140720	116190
Lmsn012627	469.33	423.33	470.34	C30H46O4	[M-H]-	2α,3α-Dihydroxyurs-12,18-dien-28-oic acid	Triterpene	-	A	183010	180400	183550	717910	614780	615280	283260	281580	293420
Hmjn008136	469.33	469.33	470.34	C30H46O4	[M-H]-	Camaldulenic acid	Triterpene	71850-15-2	B	4256900	4315700	4644300	15725000	15531000	14298000	6966900	6591300	6818800
Lmzn006169	471.35	471.35	472.355	C30H48O4	[M-H]-	Pomolic acid	Triterpene	13849-91-7	A	32090000	36578000	36290000	35918000	35460000	34528000	33745000	30842000	36100000
pmn001706	471.35	471.35	472.355	C30H48O4	[M-H]-	2-Hydroxyoleanolic acid*	Triterpene	26707-60-8	A	37273000	34540000	34658000	23544000	23521000	22561000	35143000	36306000	35784000
mws1610	471.35	471.35	472.355	C30H48O4	[M-H]-	Maslinic acid*	Triterpene	4373-41-5	A	37201000	33866000	34437000	22075000	23549000	26908000	42970000	43445000	43421000
pmp000266	473.36	207.17	472.355	C30H48O4	[M+H]+	3β,19α-Dihydroxyolean-12-en-28-oic acid	Triterpene	-	A	65777	66329	63815	130980	131380	145860	114520	96384	133940
Zmpn008194	471.35	471.35	472.355	C30H48O4	[M-H]-	Corosolic acid*	Triterpene	4547-24-4	A	32297000	34792000	34448000	25153000	26469000	25814000	46539000	41717000	39136000
Lmsn012480	483.31	421.31	484.319	C30H44O5	[M-H]-	Fupenzic acid	Triterpene	119725-20-1	B	312280	282490	312450	537150	512050	406840	1455600	1479100	1513600
pmp000444	487.34	469.33	486.335	C30H46O5	[M+H]+	27,28-Dicarboxyl ursolic acid	Triterpene	-	B	16833	20633	21335	403860	380970	407410	152020	171270	158900
pmp000268	487.34	405.31	486.335	C30H46O5	[M+H]+	Rosamultic acid	Triterpene	14285-76-4	A	6209600	6284800	6027800	9843100	8874100	8977300	12529000	12890000	12555000
Li512114	485.36	453.34	486.371	C31H50O4	[M-H]-	Corosolic Acid Methyl Ester	Triterpene	4518-70-1	B	59690	68680	73903	1090800	1080400	982040	223160	184380	214810
pmn001426	487.34	469.23	488.35	C30H48O5	[M-H]-	Euscaphic acid	Triterpene	53155-25-2	B	65023	61437	59453	525700	475160	507730	93736	98889	87954
Zmpn006881	487.34	469.32	488.35	C30H48O5	[M-H]-	Tormentic acid	Triterpene	13850-16-3	B	228310	239370	237230	1982200	2052600	1873700	372340	390410	415740
Lmsn009900	501.32	453.3	502.329	C30H46O6	[M-H]-	1β-Hydroxy-2-oxopomolic acid	Triterpene	217466-37-0	A	45136	39637	41761	200860	203620	235600	610510	715070	603610
Lmsn010604	501.32	421.31	502.329	C30H46O6	[M-H]-	2α,3α,19α-Trihydroxyurs-12-en-23-formyl-28-oic Acid	Triterpene	-	A	227530	178900	174320	367400	301050	314480	594890	591540	621210
Lmsn009238	503.34	441.34	504.345	C30H48O6	[M-H]-	1β-Hydroxyeuscaphic acid	Triterpene	120211-98-5	B	99533	100810	106310	291060	251130	283490	1424500	1549800	1469200
pmp000781	619.4	437.34	618.392	C39H54O6	[M+H]+	p-Coumaroyleuscaphic acid	Triterpene	-	A	1313500	1729800	1696400	223200	327990	248470	1218500	601280	555830
pmp000782	635.39	435.32	634.387	C39H54O7	[M+H]+	Caffeoylhawthorn acid	Triterpene	-	A	2574500	2474600	3902900	1725100	1599200	1611100	4034100	3516000	4424500
pmp000780	665.4	409.3	664.398	C40H56O8	[M+H]+	3-O-Trans-feruloyl euscaphic acid	Triterpene	-	B	93940	79648	104670	9362.2	9079.1	8471.6	200390	189630	214780
Lmmn004145	675.41	397.14	679.419	C38H60O10	[M-H]-	3-O-(2-O-Acetyl-glucosyl)oleanolic acid	Triterpene	-	B	91035	75204	97151	107720	85912	100440	37153	38383	45778
Lmsn006839	681.39	519.33	682.393	C36H58O12	[M-H]-	2α,3β,19α,23,24-Pentahydroxyolean-12-en-28-oic acid-28-O-glucoside	Triterpene	-	B	173140	171810	175430	34991	36521	36517	15011	12219	13411
Lmgn000188	89.02	59.01	90.032	C3H6O3	[M-H]-	D-Lactic Acid	Organic acids	10326-41-7	B	8456	11233	7554.3	4986.7	6026.3	8612.6	8307.1	9620	11102
Lmqp000873	101.02	55.02	100.018	C4H4O3	[M+H]+	Succinic anhydride	Organic acids	108-30-5	B	148880	201490	163640	377300	395210	360470	137090	140250	155700
mws4052	102.05	56.05	101.048	C4H7NO2	[M+H]+	1-Aminocyclopropane-1-carboxylic acid	Organic acids	22059-21-8	B	528330	548120	464960	464010	403070	467370	244510	206140	240150
Lmgn000219	101.02	55.02	102.032	C4H6O3	[M-H]-	Succinic semialdehyde	Organic acids	692-29-5	A	6441.6	12575	16749	8840.9	14888	16037	19887	16781	29602
pme3011	104.07	68.8	103.063	C4H9NO2	[M+H]+	γ-Aminobutyric acid*	Organic acids	56-12-2	A	145480	139780	135540	132280	127280	121620	41079	36560	43054
mws0376	115	71	116.011	C4H4O4	[M-H]-	Fumaric acid	Organic acids	110-17-8	A	851900	871890	992450	902860	853690	888940	867890	887060	874210
mws2628	118.09	87.05	117.07	C5H11NO2	[M+H]+	N-Methyl-4-aminobutyric acid	Organic acids	1119-48-8	B	2088.2	2862.3	1817.7	772.39	4917.4	1320.9	1288.4	1293.2	2349.2
mws0192	117.02	73	118.027	C4H6O4	[M-H]-	Succinic acid*	Organic acids	110-15-6	A	9137800	9082000	10169000	19323000	20376000	18775000	8947200	9044100	8518300
mws0470	117.02	73	118.027	C4H6O4	[M-H]-	Methylmalonic acid*	Organic acids	516-05-2	A	9369300	9176000	10022000	19755000	20272000	18714000	9341700	8861000	9103000
pme1730	117	59	118.027	C4H6O4	[M-H]-	D-Erythronolactone	Organic acids	15667-21-7	B	5578.6	4835	12707	10371	12045	6659.1	16000	18336	20559
mws0147	117.06	59	118.063	C5H10O3	[M-H]-	β-Hydroxyisovaleric acid	Organic acids	625-08-1	A	29223	24034	24204	28363	45876	27438	13969	37706	20792
pme3096	118	74	119.022	C3H5NO4	[M-H]-	Aminomalonic acid	Organic acids	1068-84-4	A	321570	313470	357090	688010	719050	660890	317630	322840	308200
mws0671	120.07	74.1	119.058	C4H9NO3	[M+H]+	L-Homoserine*	Organic acids	672-15-1	A	734580	969900	680010	1149300	1243400	1273100	667650	560730	554710
Lmgp002593	123.04	77.04	122.037	C7H6O2	[M+H]+	3-hydroxybenzaldehyde	Organic acids	100-83-4	B	51831	69188	34496	72647	81828	76812	47211	34185	50737
mws0236	124.01	80	125.015	C2H7NO3S	[M-H]-	2-Aminoethanesulfonic acid	Organic acids	107-35-7	B	9	9	9	9679.1	11561	10687	30191	16110	16338
mws0425	129.02	85	130.027	C5H6O4	[M-H]-	Citraconic acid	Organic acids	498-23-7	A	2392500	3014300	3299500	1929500	2444800	2373600	2337100	1986900	2208300
Zmgn000217	129.02	85.03	130.027	C5H6O4	[M-H]-	Methylenesuccinic acid	Organic acids	97-65-4	A	21425	20856	8091	17357	15915	14980	10044	11751	16676
pme0243	131.03	87.05	132.042	C5H8O4	[M-H]-	Glutaric acid*	Organic acids	110-94-1	A	3143.7	1904.5	2521.3	1771.6	3165.3	2903.7	3604.4	5393.1	4525.1
Lmbn001364	131.03	87.05	132.042	C5H8O4	[M-H]-	4-Hydroxy-2-Oxopentanoic Acid*	Organic acids	3318-73-8	B	42717	40484	46366	27929	24387	21106	48912	46485	43272
mws0473	131.03	87.05	132.042	C5H8O4	[M-H]-	2-Methylsuccinic acid*	Organic acids	498-21-5	A	47573	45602	47232	27896	32679	28846	56849	59597	55690
Lmbn001288	131.03	87.04	132.042	C5H8O4	[M-H]-	2-Hydroxy-2-methyl-3-oxobutanoic acid*	Organic acids	71698-08-3	B	41524	45651	44162	29553	24712	27655	44085	47656	55415
Lmgn000160	131.05	70.03	132.053	C4H8N2O3	[M-H]-	3-Ureidopropionic Acid	Organic acids	462-88-4	B	9473.1	12882	11601	13590	13468	12841	1874.7	329.84	1254.4
mws0972	131.07	85	132.079	C6H12O3	[M-H]-	6-Hydroxyhexanoic acid	Organic acids	1191-25-9	B	7564	7428	7866.6	13883	20528	13323	11457	11239	9339.7
Lmbn000198	133.01	71.01	134.022	C4H6O5	[M-H]-	3-Dehydro-L-Threonic Acid*	Organic acids	-	A	7291700	7075200	7435600	6607800	6822300	7203200	7276200	6918400	6954100
mws0275	133.01	71.01	134.022	C4H6O5	[M-H]-	L-Malic acid*	Organic acids	97-67-6	A	7174900	7280300	8295900	6730500	7228800	7026100	6714900	7216900	6759400
Lmbn002862	137.02	93.03	138.032	C7H6O3	[M-H]-	3-Hydroxybenzoic Acid	Organic acids	99-06-9	B	21266	23922	16483	38520	16237	36748	15819	17121	17800
pme3207	141.02	59	142.027	C6H6O4	[M-H]-	Muconic acid	Organic acids	1119-72-8	B	234330	258070	210860	410590	253240	293940	380580	508590	356690
pme0295	146.08	86	145.074	C6H11NO3	[M+H]+	4-Acetamidobutyric acid	Organic acids	3025-96-5	B	18752	26208	19043	9927.5	11463	5906.9	22864	8147.2	14057
mws0567	146.09	87	145.085	C5H11N3O2	[M+H]+	4-Guanidinobutyric acid	Organic acids	463-00-3	B	78056	111100	105580	104290	134870	126090	88835	79554	98679
pme2380	145.01	101	146.022	C5H6O5	[M-H]-	α-Ketoglutaric acid	Organic acids	328-50-7	A	461750	517970	453890	823670	870290	748270	1143800	1157500	1263700
mws0208	145.05	101	146.058	C6H10O4	[M-H]-	Adipic Acid	Organic acids	124-04-9	B	113220	88593	85314	93281	95292	99235	63496	70544	59663
Lmbn000216	147.03	57.03	148.037	C5H8O5	[M-H]-	3-Methylmalic acid*	Organic acids	152204-30-3	A	37497	31604	34717	38496	56639	43187	22025	54164	26810
Zmyn000247	147.03	57.03	148.037	C5H8O5	[M-H]-	2-Hydroxyglutaric Acid*	Organic acids	13095-48-2	A	98417	68161	40955	138780	66046	80778	63184	67708	67089
pmb2826	147.03	87.1	148.037	C5H8O5	[M-H]-	L-Citramalic acid*	Organic acids	6236-09-5	A	70701	60132	57874	79407	80986	40261	28107	46547	47073
pme3154	147.07	59.01	148.074	C6H12O4	[M-H]-	Mevalonic acid	Organic acids	150-97-0	A	349520	364400	461120	480520	520970	509820	291850	297850	336960
mws0262	149.01	87	150.016	C4H6O6	[M-H]-	L-Tartaric acid	Organic acids	87-69-4	B	63946	66662	61172	81961	101800	100100	52006	56755	52220
pmf0420	149.06	74.9	150.068	C9H10O2	[M-H]-	Benzyl acetate	Organic acids	140-11-4	B	136800	131920	142040	123760	109950	97880	112060	117780	139570
mws0639	153.02	109.03	154.027	C7H6O4	[M-H]-	2,3-Dihydroxybenzoic Acid*	Organic acids	303-38-8	B	64122	92431	122290	159060	140580	107290	49266	58620	41118
Lmbn001467	158.08	116.07	159.09	C7H13NO3	[M-H]-	5-Acetamidopentanoic Acid	Organic acids	1072-10-2	B	6160.4	6899.9	6454.6	9655.8	8858.6	13824	18561	17677	13975
Lmmn001643	163.04	119.05	164.047	C9H8O3	[M-H]-	2-Hydroxycinnamic acid	Organic acids	583-17-5	B	9	9	9	52553	43304	50947	3367.5	8374.2	13092
pme0282	165.02	77.04	166.027	C8H6O4	[M-H]-	Phthalic acid*	Organic acids	88-99-3	A	33230	34581	22363	18586	17495	13477	29854	23327	28201
mws0344	165.04	75	166.048	C5H10O6	[M-H]-	D-Xylonic acid	Organic acids	526-91-0	A	2617900	3302000	2556100	2429500	3076000	2842000	4883800	4286500	4966100
Lmrn003000	165.06	103.06	166.063	C9H10O3	[M-H]-	2-Hydroxy-3-phenylpropanoic acid	Organic acids	7326-19-4	B	51604	62643	57388	35653	51394	46115	4781.3	4303.1	2110.4
mws2125	166.98	78.7	167.982	C3H5O6P	[M-H]-	Phosphoenolpyruvate	Organic acids	138-08-9	B	85210	120140	63716	86418	69985	94426	48099	26344	39186
pme3186	169	79	169.998	C3H7O6P	[M-H]-	DL-Glyceraldehyde-3-phosphate	Organic acids	591-59-3	B	112880	90547	65799	96549	76578	72091	67390	90901	57465
Xmbp001692	171.03	81.03	170.022	C7H6O5	[M+H]+	2,4,6-Trihydroxybenzoic acid	Organic acids	83-30-7	B	94859	127170	117550	154920	171800	148400	107830	119670	104210
ML10176345	171.03	109.03	172.037	C7H8O5	[M-H]-	3-Dehydroshikimic acid	Organic acids	2922-42-1	B	182470	279390	211430	198350	188920	161710	207050	140530	228030
Lmbn003524	171.1	99.08	172.11	C9H16O3	[M-H]-	9-Oxononanoic acid	Organic acids	2553-17-5	B	6120.6	5401.5	4765.9	6207.4	7768.6	7066.7	10899	9933.5	9952.1
pme3009	175.02	99	174.016	C6H6O6	[M+H]+	Trans-Citridic acid	Organic acids	4023-65-8	B	1107000	994850	1053500	829590	865690	761600	1173200	1220400	1204500
mws0154	173.05	93	174.053	C7H10O5	[M-H]-	Shikimic acid	Organic acids	138-59-0	B	457920	436780	525650	295020	330630	425900	498960	496920	380770
pmb3101	175.06	115	176.068	C7H12O5	[M-H]-	2-Isopropylmalic Acid*	Organic acids	49601-06-1	A	4285700	5200100	4860000	4072600	4883800	4762600	4402400	4337400	4566800
Zmgn001448	175.06	115.04	176.068	C7H12O5	[M-H]-	2-Propylmalic Acid*	Organic acids	-	A	3487000	2858900	4431300	4170100	3567200	3008700	2664500	2847000	3042800
mws0237	187.1	125	188.105	C9H16O4	[M-H]-	Azelaic acid	Organic acids	123-99-9	A	505040	459160	539190	589890	588790	625070	1270600	1203000	1368200
Zmyn000453	191.02	111.01	192.027	C6H8O7	[M-H]-	Isocitric Acid*	Organic acids	320-77-4	A	9521600	11592000	11499000	9364500	9960600	8352900	6563800	5895200	6245400
mws0281	191.02	111.01	192.027	C6H8O7	[M-H]-	Citric Acid*	Organic acids	77-92-9	A	10610000	9562400	9189600	11078000	11077000	11027000	6452800	7593500	7482200
mws0277	191.06	85	192.063	C7H12O6	[M-H]-	Quinic Acid	Organic acids	77-95-2	A	19275000	20864000	21840000	16161000	18920000	17895000	11962000	11969000	11791000
mws1189	193.04	72.8	194.033	C6H10O7	[M-H]-	D-Galacturonic acid*	Organic acids	685-73-4	A	253640	231860	240320	266860	260730	280420	299450	322880	368820
Zmtn001464	204.03	160.04	205.038	C10H7NO4	[M-H]-	4,8-Dihydroxyquinoline-2-carboxylic acid	Organic acids	59-00-7	B	25869	25696	37839	7014.2	6404.2	7320.2	12879	11822	14667
pme0220	225.15	151.11	224.141	C13H20O3	[M+H]+	Methyl jasmonate	Organic acids	1211-29-6	B	7909	6828.2	9025.6	5594.8	7642.3	7463.2	6313.1	6723.4	4097
Lmtn004049	263.13	204.12	264.136	C15H20O4	[M-H]-	Abscisic acid	Organic acids	21293-29-8	B	6512.7	8691.3	9120.8	10954	9546.4	11906	8130.1	7375.3	8334.8
Lmmn003323	271.23	225.22	272.235	C16H32O3	[M-H]-	2-Hydroxyhexadecanoic acid	Organic acids	764-67-0	A	88120	88344	109140	118090	97230	101660	104960	105920	101580
pmb2657	289.1	97.1	290.123	C10H18N4O6	[M-H]-	Argininosuccinic acid	Organic acids	2387-71-5	B	1230600	1396000	1381900	1563800	1852600	2280600	3451200	3773300	4102500
pmb3059	543.1	191.2	544.128	C19H28O18	[M-H]-	Quinic acid O-di-glucuronic acid	Organic acids	-	B	11325	12189	12724	6346.3	9183.7	9340.7	8243.8	8586.1	6589.9
pmb0128	213.3	81	212.178	C13H24O2	[M+H]+	δ-Tridecalactone	Glycerol ester	7370-92-5	B	10361	11138	12316	31370	32137	36971	39287	59001	46157
pmp001284	331.28	313.27	330.277	C19H38O4	[M+H]+	Monopalmitin	Glycerol ester	542-44-9	A	161640	168070	168220	164990	162130	179630	129310	149500	130770
Lmhp011388	353.27	261.22	352.261	C21H36O4	[M+H]+	2-α-Linolenoyl-glycerol	Glycerol ester	55268-58-1	A	304670	298780	291390	368310	370560	340950	665300	653520	732560
Lmhp011562	353.27	261.22	352.261	C21H36O4	[M+H]+	1-α-Linolenoyl-glycerol	Glycerol ester	-	A	311150	264860	281810	368860	368670	342250	665880	678450	727080
Lmhp012042	355.28	263.24	354.277	C21H38O4	[M+H]+	2-Linoleoylglycerol	Glycerol ester	3443-82-1	A	86952	87010	77321	80385	68245	77606	412790	387660	419060
Lmhp112042	355.28	263.24	354.277	C21H38O4	[M+H]+	1-Linoleoylglycerol	Glycerol ester	2277-28-3	A	89643	79428	93795	83147	73149	69170	415360	425980	435250
pmb0296	357.3	265.4	356.293	C21H40O4	[M+H]+	1-Oleoyl-Sn-Glycerol	Glycerol ester	129784-87-8	B	26030	26416	30763	17159	14070	14702	10823	6912.6	9771
Cmbp005523	417.12	163.04	416.111	C21H20O9	[M+H]+	1,3-O-Dicaffeoylglycerol	Glycerol ester	-	B	51323	38329	48319	41203	49216	51084	46620	37874	41662
Hmyn007168	483.27	255.23	484.278	C22H45O9P	[M-H]-	LysoPG 16:0	Glycerol ester	-	B	43495	53177	51135	35915	42883	43768	107610	116260	117900
Lmhp010573	517.34	263.24	516.33	C27H48O9	[M+H]+	1-Linoleoylglycerol-3-O-glucoside	Glycerol ester	-	A	16099	20504	8681.7	15613	9019.5	12320	325840	305460	313900
Lmhp010334	517.34	263.24	516.33	C27H48O9	[M+H]+	2-Linoleoylglycerol-1-O-glucoside	Glycerol ester	-	A	14966	11411	10899	13010	14765	9159.2	316760	341490	327370
Hmyp007792	636.41	495.4	635.414	C32H62NO9P	[M+H]+	PE(oxo-11:0/16:0)	Glycerol ester	-	B	636810	526390	479230	724850	595530	811950	89718	115320	112840
Lmxp010913	676.45	184.08	675.448	C35H66NO9P	[M+H]+	1-(9Z-Octadecenoyl)-2-(9-oxo-nonanoyl)-sn-glycero-3-phosphocholine	Glycerol ester	-	B	9805	6972.5	8176.4	20770	13942	18201	9	9	9
Lmhp009190	679.39	263.24	678.383	C33H58O14	[M+H]+	2-Linoleoylglycerol-1,3-di-O-glucoside	Glycerol ester	-	B	3393.9	1263.7	1321.1	1550.9	1348.2	1570.2	2129.3	1938.2	2227.1
Hmyp007589	784.47	643.46	783.466	C41H70NO11P	[M+H]+	PE(18:3/18:3+O3)	Glycerol ester	-	B	8358.9	9906.3	7836.3	11022	12789	14022	1470.3	1720.4	1915.8
mws0120	258.11	104.11	257.103	C8H20NO6P	[M+H]+	Choline Alfoscerate	PC	28319-77-9	A	975090	996520	948810	1689200	1365600	1451300	2735500	2681600	3111500
pmb0168	700.49	184.4	699.484	C38H70NO8P	[M+H]+	PC 16:1/14:1	PC	-	B	45587	44242	41246	72472	63398	71465	19842	20136	26367
Hmyp007396	702.46	184.07	701.46	C37H68NO9P	[M+H]+	PC(oxo-11:0/18:2)	PC	-	B	161800	122500	146050	212780	199770	238100	43758	59735	65775
pmp001264	274.27	256.27	273.267	C16H35NO2	[M+H]+	Hexadecylsphingosine	Sphingolipids	-	A	2771100	2755700	3072800	2549600	2673100	2875700	2969100	2653900	3215700
mws1349	302.31	109.2	301.298	C18H39NO2	[M+H]+	Dihydrosphingosine	Sphingolipids	764-22-7	B	26677	22829	23976	18565	17106	18231	24954	24495	25365
pmb2221	318.3	60.1	317.293	C18H39NO3	[M+H]+	4-Hydroxysphinganine	Sphingolipids	554-62-1	B	697240	748470	718590	1174600	1265700	1131000	922170	920880	930180
pmb0862	440.28	184.07	439.27	C20H42NO7P	[M+H]+	LysoPC 12:0	LPC	20559-18-6	B	4458.4	4010.8	4329.4	45798	42517	44335	19710	21921	23093
pmd0130	468.31	184.07	467.301	C22H46NO7P	[M+H]+	LysoPC 14:0	LPC	20559-16-4	B	7745.6	7358.1	6893.4	24578	26028	26088	58913	55133	62366
pmb2260	480.31	184.07	479.301	C23H46NO7P	[M+H]+	LysoPC 15:1	LPC	-	B	3504.5	3340.4	2442.8	9287.3	8477.3	8691.3	41747	39705	53283
pmb2319	482.32	184.07	481.317	C23H48NO7P	[M+H]+	LysoPC 15:0	LPC	108273-89-8	B	7152.5	7202.6	9103.2	28310	27648	32775	68726	67503	72534
pma1303	492.31	184.07	491.301	C24H46NO7P	[M+H]+	LysoPC 16:2	LPC	-	A	1400.3	2404.5	1882.1	1608.3	3046.8	3829.1	22661	20407	22631
pmb0863	492.31	184.07	491.301	C24H46NO7P	[M+H]+	LysoPC 16:2(2n isomer)	LPC	-	A	1093.2	1739.6	2222.4	2890.1	2538.7	3389.8	18393	21508	19555
pmp001270	494.32	184.07	493.317	C24H48NO7P	[M+H]+	LysoPC 16:1	LPC	76790-27-7	A	23299	27890	30116	36240	27503	45922	165900	155660	175760
Lmhp008833	494.32	184.07	493.317	C24H48NO7P	[M+H]+	LysoPC 16:1(2n isomer)	LPC	-	A	46412	52380	51761	74605	56924	80562	92807	100220	109650
pmb0855	496.34	184.07	495.332	C24H50NO7P	[M+H]+	LysoPC 16:0	LPC	17364-16-8	A	730610	815010	810430	3233100	3044400	3436600	6568200	7382800	7536500
pmd0132	496.34	184.07	495.332	C24H50NO7P	[M+H]+	LysoPC 16:0(2n isomer)	LPC	-	A	779760	824140	864910	3233100	3200500	3487600	6668200	7123000	7543400
Lmhp008718	506.32	184.07	505.317	C25H48NO7P	[M+H]+	LysoPC 17:2	LPC	-	B	2572	3967.2	4050	8245	7823.6	9430.4	38888	35637	40137
Lmhp009590	508.34	184.07	507.332	C25H50NO7P	[M+H]+	LysoPC 17:1	LPC	-	B	12034	13899	16078	17238	15578	18808	30976	40333	42838
Lmhp010515	510.36	184.07	509.348	C25H52NO7P	[M+H]+	LysoPC 17:0(2n isomer)	LPC	-	B	2935.2	2463.9	3178.8	11949	9596.6	13471	37007	38916	38089
pmb2406	510.36	184.07	509.348	C25H52NO7P	[M+H]+	LysoPC 17:0	LPC	50930-23-9	B	30985	33714	31281	91835	94804	90383	326600	334890	366180
pmb0865	518.32	184.07	517.317	C26H48NO7P	[M+H]+	LysoPC 18:3(2n isomer)	LPC	-	A	232330	274090	252730	851600	853390	948200	2606700	2695600	2835100
pmb0854	518.32	184.07	517.317	C26H48NO7P	[M+H]+	LysoPC 18:3	LPC	-	A	257230	275790	250320	819950	851700	948990	2367200	2402900	2637000
pmp001273	520.34	184.07	519.332	C26H50NO7P	[M+H]+	LysoPC 18:2	LPC	-	A	1538800	1603200	1580300	4130900	3826000	4335800	20750000	19310000	22319000
pmp001251	520.34	184.07	519.332	C26H50NO7P	[M+H]+	LysoPC 18:2(2n isomer)	LPC	-	A	1456300	1495000	1524800	3739700	3592200	4054500	18642000	19902000	21457000
Lmhp010190	522.36	184.07	521.348	C26H52NO7P	[M+H]+	LysoPC 18:1(2n isomer)	LPC	-	A	568300	542360	579990	1228700	1090100	1169900	3615500	3444600	3824200
pmp001281	522.36	184.07	521.348	C26H52NO7P	[M+H]+	LysoPC 18:1	LPC	-	A	601900	523590	567120	1137200	1079600	1152800	3561000	3356000	3981000
pmd0136	524.37	184.07	523.364	C26H54NO7P	[M+H]+	LysoPC 18:0(2n isomer)	LPC	-	A	21674	21588	20389	75430	61831	75495	294680	283660	302850
mws0126	524.37	184.07	523.364	C26H54NO7P	[M+H]+	LysoPC 18:0	LPC	19420-57-6	A	375270	384210	385530	910430	842760	889920	3805200	3395000	3923000
Lmhp008924	532.34	184.07	531.332	C27H50NO7P	[M+H]+	LysoPC 19:3	LPC	-	B	1815	1288.6	619.22	4208.6	4126.3	4210.9	7675.3	5748.4	6986.7
Lmhp007840	534.36	184.07	533.348	C27H52NO7P	[M+H]+	LysoPC 19:2	LPC	-	B	1598.1	1650.2	1776.9	2888.2	2845.9	3597.5	8484.4	9545.1	8411.7
Lmhp007598	534.36	184.07	533.348	C27H52NO7P	[M+H]+	LysoPC 19:2(2n isomer)	LPC	-	B	2504.4	2417.4	3043.7	4045.8	3027.4	3600.4	7463.2	7958.7	9781.7
Lmhp010908	536.37	184.07	535.364	C27H54NO7P	[M+H]+	LysoPC 19:1	LPC	-	B	9	9	9	4150.8	2290.3	2559.3	6764.5	6256.2	8028
Lmhp009890	546.36	184.07	545.348	C28H52NO7P	[M+H]+	LysoPC 20:3	LPC	1199257-41-4	B	27128	28472	31771	54258	55397	52215	33848	33191	28445
pmd0147	548.37	184.07	547.364	C28H54NO7P	[M+H]+	LysoPC 20:2	LPC	-	A	45794	45440	54568	83996	86942	86666	237480	242310	269470
pmd0146	548.37	184.07	547.364	C28H54NO7P	[M+H]+	LysoPC 20:2(2n isomer)	LPC	-	A	48530	50304	55034	88848	80184	97636	235910	247040	283190
Lmhp011549	550.39	184.07	549.379	C28H56NO7P	[M+H]+	LysoPC 20:1	LPC	-	B	9389	7907.2	9070.5	12867	9943.4	14184	66445	56621	70135
Lmhp008337	426.26	285.24	425.254	C19H40NO7P	[M+H]+	LysoPE 14:0(2n isomer)	LPE	-	B	2754.9	2954.8	2653.5	5023.3	7220.7	9806.7	26218	33893	35221
pmb0864	426.26	285.24	425.254	C19H40NO7P	[M+H]+	LysoPE 14:0	LPE	-	B	2501	3667.1	3395.5	9592.5	11783	9707.2	39583	36085	39730
Lmhp008273	438.26	297.24	437.254	C20H40NO7P	[M+H]+	LysoPE 15:1(2n isomer)	LPE	-	B	9	9	9	9	9	9	3502.7	5851.2	5268.7
Lmhp008440	438.26	297.24	437.254	C20H40NO7P	[M+H]+	LysoPE 15:1	LPE	-	B	9	9	9	9	9	9	6076.6	5614.8	5210.5
Lmhp008885	440.28	299.26	439.27	C20H42NO7P	[M+H]+	LysoPE 15:0(2n isomer)	LPE	-	A	18487	23512	18222	55467	54515	45865	86185	85429	92741
Lmhp009187	440.28	299.26	439.27	C20H42NO7P	[M+H]+	LysoPE 15:0	LPE	-	A	13378	18970	20496	65805	60573	57321	72735	85080	81296
Lmhp008763	452.28	311.26	451.27	C21H42NO7P	[M+H]+	LysoPE 16:1(2n isomer)	LPE	-	B	3886.2	2587.6	3783.1	2560.3	3025	4557.7	6168.9	4689.5	7856.3
Lmhp009034	452.28	311.26	451.27	C21H42NO7P	[M+H]+	LysoPE 16:1	LPE	-	B	6926.7	5636.4	9102.1	12229	8702.4	11123	49121	48896	50093
pmb0876	454.29	313.27	453.286	C21H44NO7P	[M+H]+	LysoPE 16:0	LPE	53862-35-4	A	313690	306940	310830	1180700	1171700	1288400	3386100	3312600	3427800
pmd0160	454.29	313.27	453.286	C21H44NO7P	[M+H]+	LysoPE 16:0(2n isomer)	LPE	-	A	768.46	7781.4	8954.6	28145	29186	35679	80317	75481	89632
Lmhp009769	466.29	325.27	465.286	C22H44NO7P	[M+H]+	LysoPE 17:1	LPE	-	B	9	9	9	2056.3	1923.7	2817.3	24397	23716	27471
Lmhp009464	466.29	325.27	465.286	C22H44NO7P	[M+H]+	LysoPE 17:1(2n isomer)	LPE	-	B	9	9	9	1908.6	1634.8	2162.3	22974	21806	21660
Lmhp010162	468.31	327.29	467.301	C22H46NO7P	[M+H]+	LysoPE 17:0	LPE	-	B	4362.8	4573.5	3710.7	2865.3	5330	2239.4	9415.6	10051	10282
Lmhp008589	476.28	335.26	475.27	C23H42NO7P	[M+H]+	LysoPE 18:3(2n isomer)	LPE	-	A	45380	42207	49357	118880	139710	138190	337030	312320	364740
Lmhp008801	476.28	335.26	475.27	C23H42NO7P	[M+H]+	LysoPE 18:3	LPE	-	A	45502	49213	48085	120050	126990	135030	357550	360410	356690
pmb0881	478.29	337.27	477.286	C23H44NO7P	[M+H]+	LysoPE 18:2	LPE	-	A	327370	336910	358030	740690	731180	813250	3753400	3734500	4020000
pmb0874	478.29	337.27	477.286	C23H44NO7P	[M+H]+	LysoPE 18:2(2n isomer)	LPE	-	A	315440	352070	333500	745050	733710	771520	3829600	3901700	3881300
mws0289	480.31	339.29	479.301	C23H46NO7P	[M+H]+	LysoPE 18:1	LPE	89576-29-4	A	60789	63175	58712	124070	118930	131170	587750	583200	646830
pmb0856	480.31	339.29	479.301	C23H46NO7P	[M+H]+	LysoPE 18:1(2n isomer)	LPE	-	A	42779	35426	43951	64783	77450	81197	420210	387970	376570
pmb0883	482.32	341.31	481.317	C23H48NO7P	[M+H]+	LysoPE 18:0	LPE	69747-55-3	B	29219	32794	32807	62755	62387	63498	404980	386530	413420
Lmhp010040	504.31	363.29	503.301	C25H46NO7P	[M+H]+	LysoPE 20:3	LPE	-	A	3349.7	4698.2	5563.9	4744.3	4803	8400.6	8612.5	9099.3	8740.4
Lmhp009802	504.31	363.29	503.301	C25H46NO7P	[M+H]+	LysoPE 20:3(2n isomer)	LPE	-	A	4545.1	3783.7	4280.3	5258.8	7472.7	6879.6	7430.2	7184.9	7789.7
Lmhp010514	506.32	365.31	505.317	C25H48NO7P	[M+H]+	LysoPE 20:2(2n isomer)	LPE	-	B	5795.6	5529	6768	10041	8645.4	10751	52416	53368	61895
Lmhp010757	506.32	365.31	505.317	C25H48NO7P	[M+H]+	LysoPE 20:2	LPE	-	B	5245.2	5889.8	5148.8	10890	8215.7	8063.6	51288	51318	52596
mws0752	185.15	185.16	186.162	C11H22O2	[M-H]-	Undecylic Acid	Free fatty acids	112-37-8	A	154780	175530	173040	201930	202670	188480	137810	142470	126170
pmb2640	199.17	199.17	200.178	C12H24O2	[M-H]-	Dodecanoic acid (Lauric acid)	Free fatty acids	143-07-7	B	58952	59553	60608	50845	51794	62147	39687	40714	40892
Zmgn003633	211.13	183.14	212.141	C12H20O3	[M-H]-	12-Oxo-10E-Dodecenoic Acid	Free fatty acids	65410-38-0	B	1587.7	2058.7	2069.3	1824	1901.1	2157.5	1654.5	1581.3	2157.6
pmb2643	225.19	207	226.193	C14H26O2	[M-H]-	Myristoleic acid	Free fatty acids	544-64-9	A	3089.3	2472.9	1923	2260.2	3533.3	3096.7	1571.2	1902.5	2108.7
mws0119	227.2	227.2	228.209	C14H28O2	[M-H]-	Myristic Acid	Free fatty acids	544-63-8	A	6175400	5794000	6505800	6703700	6882200	6024000	6203200	6069900	6099600
pme2827	239	223	240.245	C16H32O	[M-H]-	Palmitaldehyde	Free fatty acids	629-80-1	B	50880000	51906000	53298000	52370000	52940000	52733000	53156000	52687000	52040000
mws0359	241.22	241.22	242.225	C15H30O2	[M-H]-	Pentadecanoic Acid	Free fatty acids	1002-84-2	B	51547	44938	50129	45764	52059	48592	37853	43639	36306
mws0361	253.22	235.19	254.225	C16H30O2	[M-H]-	Palmitoleic Acid*	Free fatty acids	373-49-9	A	6273.7	4548	6179.7	7416	9828.2	6669.4	11734	12107	12914
Lmcn009122	253.22	235.21	254.225	C16H30O2	[M-H]-	(7Z)-Hexadecenoic acid*	Free fatty acids	2416-19-5	A	4861	4642.5	5868.8	7438.5	7736.1	7844	9948.7	13833	11235
mws1488	255.23	237.22	256.24	C16H32O2	[M-H]-	Palmitic acid	Free fatty acids	57-10-3	A	11065	9962.4	14201	10580	11038	8261.2	13610	12672	16097
mws0383	267.23	267.23	268.24	C17H32O2	[M-H]-	10-Heptadecenoic Acid	Free fatty acids	29743-97-3	A	189410	214220	207970	244470	232240	211770	271730	287130	281030
pmf0293	269.29	209.2	270.292	C18H38O	[M-H]-	1-Octadecanol	Free fatty acids	112-92-5	B	72828	77555	74369	86185	84745	83791	80856	83347	79674
pmb1574	277.2	93	276.209	C18H28O2	[M+H]+	9,12-Octadecadien-6-Ynoic Acid	Free fatty acids	61481-29-6	B	36302	29443	33891	12833	14549	14416	14686	14981	26507
mws0367	277.22	277.22	278.225	C18H30O2	[M-H]-	α-Linolenic Acid*	Free fatty acids	463-40-1	A	1941900	1866400	2186800	2294200	1980400	2407100	2951700	3038400	3319300
Lmbn005923	277.22	59.01	278.225	C18H30O2	[M-H]-	Crepenynic acid	Free fatty acids	2277-31-8	B	32350	32188	34457	37779	37769	37505	52088	56288	58189
pmb0889	279.23	95.1	278.225	C18H30O2	[M+H]+	Punicic acid (9Z,11E,13Z-octadecatrienoic acid)	Free fatty acids	544-72-9	A	129640	133360	145470	158170	156970	152940	593770	526910	547750
mws0366	277.22	277.22	278.225	C18H30O2	[M-H]-	γ-Linolenic Acid*	Free fatty acids	506-26-3	A	1983400	2072000	2096200	2141900	2147000	2216000	3249400	3258000	3125900
pmb1650	279.2	149.4	278.225	C18H30O2	[M+H]+	Octadeca-11E,13E,15Z-trienoic acid	Free fatty acids	25575-00-2	B	6539900	6531200	7051600	5976000	6138400	6218400	5158300	5250600	5080900
mws1491	279.23	279.23	280.24	C18H32O2	[M-H]-	Linoleic acid	Free fatty acids	60-33-3	A	6534000	7669000	6678100	3618900	3449100	3579500	21297000	20468000	22345000
Lmbn006152	279.23	59.01	280.24	C18H32O2	[M-H]-	(9Z,11E)-Octadecadienoic acid	Free fatty acids	2540-56-9	A	6357.3	8205.6	7813.4	4235.5	4786.9	4344.4	21922	21859	24722
YC512118	282.28	247.24	281.272	C18H35NO	[M+H]+	Oleamide (9-Octadecenamide)	Free fatty acids	301-02-0	A	7342.1	9072.7	8292	4219.9	4599.9	3784.8	17882	14123	16942
mws2623	281.25	281.25	282.256	C18H34O2	[M-H]-	11-Octadecanoic acid(Vaccenic acid)*	Free fatty acids	506-17-2	A	1546700	1815800	1600000	1153500	1104900	1150400	4303200	5035500	4856200
Lmyn012331	281.25	281.25	282.256	C18H34O2	[M-H]-	Petroselinic acid*	Free fatty acids	593-39-5	A	1221400	1164200	1132100	869780	777500	746460	3494900	4447900	3724000
mws1489	283.26	283.26	284.272	C18H36O2	[M-H]-	Stearic Acid	Free fatty acids	57-11-4	B	31165000	42185000	44089000	32789000	38452000	41723000	28284000	30448000	40299000
Zmyn005026	283.26	283.26	284.272	C18H36O2	[M-H]-	16-Methylheptadecanoic acid	Free fatty acids	2724-58-5	B	11851000	14966000	16038000	12557000	14273000	13088000	9423600	11340000	15007000
mws1436	287.29	97.2	286.287	C18H38O2	[M+H]+	1,18-Octadecanediol	Free fatty acids	3155-43-9	B	9	9	9	11821	14546	13281	10088	8092.7	8194.1
Lmyn007883	287.22	287.22	288.23	C16H32O4	[M-H]-	9,16-Dihydroxypalmitic acid	Free fatty acids	38076-49-2	B	426920	440880	425320	999020	935700	1019200	1139100	1230900	1119600
pmn001686	287.22	241.22	288.23	C16H32O4	[M-H]-	10,16-Dihydroxypalmitic acid	Free fatty acids	3233-90-7	B	11205	10064	10744	22856	23327	22281	26884	29443	25520
Zmpn003368	293.21	195.14	294.219	C18H30O3	[M-H]-	13S-Hydroxy-9Z,11E,15Z-octadecatrienoic acid	Free fatty acids	87984-82-5	B	5966.8	5703.3	5859.5	3971.5	4016.5	3672.7	6205.2	5964.3	7090
pmb2792	293.21	193.1	294.219	C18H30O3	[M-H]-	13-Hydroxy-6,9,11-octadecatrienoic acid	Free fatty acids	74784-20-6	B	28102	26532	22969	30930	27503	30973	26167	29139	30112
pmb2786	293.21	235.17	294.219	C18H30O3	[M-H]-	9-Hydroxy-10,12,15-octadecatrienoic acid*	Free fatty acids	89886-42-0	B	1815.5	1592.8	2178.9	1330.2	1344	1471.8	1184.2	1742	1563.7
pmb2787	293.21	275.1	294.219	C18H30O3	[M-H]-	9-Oxo-10E,12Z-octadecadienoic acid*	Free fatty acids	54232-59-6	B	6710.3	6706.6	6414.4	2993.4	2842.5	4186	5208.2	4424.8	6232.3
Hmqp005455	297.24	81.07	296.234	C18H32O3	[M+H]+	15(R)-Hydroxylinoleic Acid*	Free fatty acids	177931-23-6	B	116770	116870	110770	88817	83266	80660	173200	156760	174040
Hmqp005411	297.24	81.07	296.234	C18H32O3	[M+H]+	9-Oxo-12Z-Octadecenoic acid*	Free fatty acids	112543-32-5	B	122890	120300	109250	85803	82670	95528	167260	169950	186180
Rfmb091	295.23	195.14	296.235	C18H32O3	[M-H]-	9S-Hydroxy-10E,12Z-octadecadienoic acid*	Free fatty acids	15514-85-9	A	51299	49797	54371	56779	54585	54228	181140	180940	165900
Lmbn005369	295.23	195.14	296.235	C18H32O3	[M-H]-	13(S)-HODE;13(S)-Hydroxyoctadeca-9Z,11E-dienoic acid*	Free fatty acids	10219-69-9	A	40728	39896	42321	51930	47755	47933	159350	160740	168780
pmb2799	295.23	195.2	296.235	C18H32O3	[M-H]-	12,13-Epoxy-9-Octadecenoic Acid*	Free fatty acids	6799-85-5	A	9353.7	10348	11001	12934	12504	10544	25797	25641	27491
Lmbn005662	295.23	171.1	296.235	C18H32O3	[M-H]-	9(10)-EpOME;(9R,10S)-(12Z)-9,10-Epoxyoctadecenoic acid*	Free fatty acids	16833-56-0	B	135250	128970	131980	89826	88544	89772	127650	127580	133380
Zmyn004714	297.24	183.14	298.251	C18H34O3	[M-H]-	Ricinoleic acid	Free fatty acids	141-22-0	B	46069	46701	50001	35930	31314	31135	35262	33825	34566
pmf0297	297.32	183.1	298.324	C20H42O	[M-H]-	1-Eicosanol	Free fatty acids	629-96-9	B	41554	41467	47998	31649	30155	29527	32546	26812	28743
Zmyn005384	299.26	253.26	300.266	C18H36O3	[M-H]-	2R-Hydroxyoctadecanoic Acid	Free fatty acids	26633-48-7	B	5380.2	5080.5	8565	8460.4	6802.1	7271.2	5649.4	6876.5	6434
Lmqn008288	299.26	299.26	300.267	C18H36O3	[M-H]-	3-Hydroxyoctadecanoic Acid	Free fatty acids	45261-96-9	B	115550	113190	90793	112320	115530	116830	123490	126830	116070
pmn001610	307.26	307.3	308.272	C20H36O2	[M-H]-	Eicosadienoic acid	Free fatty acids	5598-38-9	B	55498	62841	59144	28976	24714	17081	273590	338900	317870
pmb2791	309.21	209.1	310.1	C18H30O4	[M-H]-	9-Hydroperoxy-10E,12,15Z-octadecatrienoic acid	Free fatty acids	111004-08-1	B	10831	13611	12420	14907	13027	14161	13038	17320	16339
Lmbn005287	311.22	249.22	312.23	C18H32O4	[M-H]-	7S,8S-DiHODE; (9Z,12Z)-(7S,8S)-Dihydroxyoctadeca-9,12-dienoic acid	Free fatty acids	143288-65-7	B	2996.6	3501	3804.7	7035.5	5671.1	7319	4297.7	4923.8	4823.6
pmb2804	311.1	171.3	312.23	C18H32O4	[M-H]-	13S-Hydroperoxy-9Z,11E-octadecadienoic acid	Free fatty acids	33964-75-9	B	8273.3	8661.7	6915.8	10805	8929.5	8663.5	16807	19679	18471
Lmbn004685	311.22	223.17	312.23	C18H32O4	[M-H]-	5S,8R-DiHODE; (5S,8R,9Z,12Z)-5,8-Dihydroxyoctadeca-9,12-dienoate	Free fatty acids	-	B	11776	13895	14949	18022	12927	16187	15565	20123	16682
Lmbn005487	313.24	251.24	314.246	C18H34O4	[M-H]-	12,13-DHOME; (9Z)-12,13-Dihydroxyoctadec-9-enoic acid	Free fatty acids	263399-35-5	B	21708	24735	24928	48286	48471	45451	22905	22123	24288
pmn001694	329.23	229.15	330.241	C18H34O5	[M-H]-	9,10,13-Trihydroxy-11-Octadecenoic Acid	Free fatty acids	29907-57-1	A	20681	21349	21048	23793	24137	25014	35668	38199	39410
Lmbn003970	329.23	211.14	330.241	C18H34O5	[M-H]-	9,12,13-TriHOME; 9(S),12(S),13(S)-Trihydroxy-10(E)-octadecenoic acid	Free fatty acids	97134-11-7	B	1928.5	1386.5	1481.7	1702.8	1029.4	1811.5	2064.3	2167.7	1203.8
Lmyn007622	331.25	157.12	332.256	C18H36O5	[M-H]-	9,10,18-Trihydroxystearic acid	Free fatty acids	496-86-6	A	1261	1832.5	1478.2	4594.6	3043.9	4655.8	2799.8	3644.9	3360.5
pmb2636	335.1	253.1	336.23	C20H32O4	[M-H]-	8,15-Dihydroxy-5,9,11,13-eicosatetraenoic acid	Free fatty acids	77667-08-4	B	59647	63708	63165	50991	52780	52551	26995	22458	26076
pmp001276	677.37	677.37	676.367	C33H56O14	[M+H]+	1-Linolenoyl-rac-glycerol-diglucoside	Free fatty acids	-	B	67831	65328	69483	326640	320420	319660	91071	93086	89967
Note:Isomers with the same total formula could not be distinguished are marked with *.
