# Supplementary material for: Transcriptomic and Metabolomic Analyses Providing Insights into the Coloring Mechanism of Docynia delavayi
Source: Foods. 2022 Sep 18;11(18):2899. doi: 10.3390/foods11182899 (PMC9498648; doi:10.3390/foods11182899)
Supplement: Supplementary file 1 [file foods-11-02899-s001.zip › Table S3.xlsx]

## Sheet: Sheet1
Table S3 Clean reads data quality statistics
Sample	Raw Reads	Clean Reads	Clean Base(G)	Error Rate(%)	Q20(%)	Q30(%)	GC Content(%)
G1	42885318	40638750	6.1	0.02	98.11	94.33	45.46
G2	48001436	45138252	6.77	0.02	98.33	94.86	45.59
G3	48117166	44562068	6.68	0.02	98.33	94.9	45.27
R1	51871790	48309702	7.25	0.02	98.44	95.06	45.01
R2	48820184	45801486	6.87	0.02	98.48	95.1	45.12
R3	49965802	47909554	7.19	0.02	98.49	95.13	46.7
Y1	49485600	47091270	7.06	0.02	98.42	94.96	46.31
Y2	51331934	49152146	7.37	0.02	98.48	95.12	46.58
Y3	50465256	48300602	7.25	0.02	98.63	95.46	46.14
