# Supplementary material for: Transcriptomic and Metabolomic Analyses Providing Insights into the Coloring Mechanism of Docynia delavayi
Source: Foods. 2022 Sep 18;11(18):2899. doi: 10.3390/foods11182899 (PMC9498648; doi:10.3390/foods11182899)
Supplement: Supplementary file 1 [file foods-11-02899-s001.zip › Table S4.xlsx]

## Sheet: Sheet1
Table S4 The numbers of transcription factors
Type	Number	Mean Length	N50	N90	Total Bases
Transcript	294606	875	1617	307	257674575
Unigene	194405	1192	1799	537	231743198
