# Supplementary material for: Transcriptomic and Metabolomic Analyses Providing Insights into the Coloring Mechanism of Docynia delavayi
Source: Foods. 2022 Sep 18;11(18):2899. doi: 10.3390/foods11182899 (PMC9498648; doi:10.3390/foods11182899)
Supplement: Supplementary file 1 [file foods-11-02899-s001.zip › Table S5.xlsx]

## Sheet: Sheet1
Table S5 GP vs. RP KEGG Pathway Statistics
#Kegg_pathway	ko_id	Cluter_frequency	Genome_frequency	P-value	Corrected_P-value	GeneID	KEGG Orthology
Photosynthesis	ko00195	64 out of 6135 1.04319478402608%	325 out of 69984 0.464391860996799%	7.36311e-10	1.00138e-07	Cluster-17563.77287;Cluster-17563.80092;Cluster-17563.125572;Cluster-17563.36528;Cluster-17563.8893;Cluster-17563.124542;Cluster-17563.92262;Cluster-17563.102280;Cluster-17563.98347;Cluster-17563.82001;Cluster-17563.54982;Cluster-17563.35722;Cluster-17563.47927;Cluster-17563.70207;Cluster-17563.72682;Cluster-17563.74138;Cluster-17563.122946;Cluster-17563.54335;Cluster-17563.54338;Cluster-17563.65…	K02109+K02109+K02109+K02111+K02111+K02111+K02112+K02113+K02113+K02115+K02636+K02638+K02638+K02639+K02639+K02639+K02639+K02641+K02641+K02641+K02641+K02641+K02692+K02693+K02695+K02695+K02698+K02699+K02699+K02701+K02704+K02705+K02705+K02709+K02716+K02716+K02717+K02717+K02717+K02717+K02717+K02721+K02721+K02723+K02723+K02723+K02723+K02723+K02723+K03541+K03541+K03542+K03542+K08901+K08901+K08901+K08902+…
Phenylpropanoid biosynthesis	ko00940	171 out of 6135 2.78728606356968%	1065 out of 69984 1.52177640603567%	0	0	Cluster-17563.58685;Cluster-17563.59089;Cluster-17563.64826;Cluster-17563.69386;Cluster-17563.71761;Cluster-17563.74627;Cluster-17563.82038;Cluster-35616.0;Cluster-17563.111750;Cluster-17563.111842;Cluster-17563.22334;Cluster-17563.31429;Cluster-17563.43960;Cluster-17563.44352;Cluster-17563.45335;Cluster-17563.45827;Cluster-17563.102051;Cluster-17563.66626;Cluster-17563.68902;Cluster-17563.7011;C…	K00083+K00083+K00083+K00083+K00083+K00083+K00083+K00083+K00083+K00083+K00430+K00430+K00430+K00430+K00430+K00430+K00430+K00430+K00430+K00430+K00430+K00430+K00430+K00430+K00430+K00430+K00430+K00430+K00430+K00430+K00430+K00430+K00430+K00430+K00430+K00430+K00430+K00487+K00487+K00487+K00487+K00487+K00487+K00487+K00588+K00588+K01188+K01188+K01188+K01188+K01188+K01188+K01188+K01188+K01188+K01188+K01188+…
Flavonoid biosynthesis	ko00941	83 out of 6135 1.35289323553382%	415 out of 69984 0.592992684042067%	0	0	Cluster-17563.73156;Cluster-17563.18361;Cluster-17563.65873;Cluster-17563.65875;Cluster-17563.68423;Cluster-17563.80171;Cluster-17563.80348;Cluster-17563.82419;Cluster-17563.61541;Cluster-17563.80969;Cluster-17563.14294;Cluster-17563.44398;Cluster-17563.68284;Cluster-17563.81696;Cluster-11683.0;Cluster-9015.0;Cluster-17563.35345;Cluster-17563.45851;Cluster-17563.53559;Cluster-17563.56221;Cluster-…	K00475+K00487+K00487+K00487+K00487+K00487+K00487+K00487+K00588+K00588+K00660+K00660+K00660+K00660+K00660+K00660+K01859+K01859+K01859+K01859+K01859+K01859+K01859+K01859+K01859+K01859+K01859+K05278+K05278+K05278+K05278+K05278+K05280+K05280+K08695+K08695+K08695+K08695+K08695+K08695+K08695+K08695+K08695+K09754+K09754+K09754+K09754+K09754+K09754+K09754+K13065+K13065+K13065+K13065+K13065+K13065+K13065+…
Anthocyanin biosynthesis	ko00942	3 out of 6135 0.0488997555012225%	36 out of 69984 0.051440329218107%	0.622141	1	Cluster-17563.15284;Cluster-17563.63867;Cluster-17563.68717	K12930+K12930+K12938
Isoflavonoid biosynthesis	ko00943	11 out of 6135 0.179299103504482%	122 out of 69984 0.174325560128029%	0.507194	1	Cluster-17563.27050;Cluster-17563.78836;Cluster-17563.128677;Cluster-17563.128678;Cluster-17563.73688;Cluster-17563.119478;Cluster-17563.88883;Cluster-17563.100372;Cluster-17563.41386;Cluster-17563.58276;Cluster-17563.70553	K13258+K13258+K13258+K13258+K13260+K13260+K13261+K13264+K13265+K13265+K13266
Flavone and flavonol biosynthesis	ko00944	5 out of 6135 0.0814995925020375%	38 out of 69984 0.0542981252857796%	0.237169	1	Cluster-17563.73246;Cluster-17563.82999;Cluster-11193.0;Cluster-17563.100372;Cluster-21305.0	K05280+K05280+K13080+K13264+K22794
Betalain biosynthesis	ko00965	12 out of 6135 0.19559902200489%	102 out of 69984 0.145747599451303%	0.181966	1	Cluster-17563.71473;Cluster-17563.78707;Cluster-17563.81675;Cluster-17563.9034;Cluster-39145.0;Cluster-17563.68977;Cluster-17563.7059;Cluster-17563.74363;Cluster-17563.74871;Cluster-17563.77064;Cluster-29783.0;Cluster-41783.0	K01593+K01593+K01593+K01593+K01593+K15777+K15777+K15777+K15777+K15777+K15777+K15777
Biosynthesis of secondary metabolites	ko01110	1505 out of 6135 24.5313773431133%	13220 out of 69984 18.890032007316%	0	0	Cluster-6152.0;Cluster-17563.46650;Cluster-17563.47290;Cluster-17563.60836;Cluster-17563.66579;Cluster-17563.74567;Cluster-5679.0;Cluster-17563.104365;Cluster-17563.100098;Cluster-17563.43993;Cluster-17563.101726;Cluster-17563.48963;Cluster-17563.59664;Cluster-17563.69081;Cluster-17563.81048;Cluster-17563.82151;Cluster-17563.99665;Cluster-16024.0;Cluster-25739.0;Cluster-17563.101646;Cluster-17563…	K00001+K00002+K00002+K00002+K00002+K00002+K00002+K00003+K00006+K00006+K00006+K00006+K00006+K00006+K00006+K00006+K00006+K00013+K00013+K00021+K00021+K00021+K00021+K00021+K00021+K00025+K00026+K00026+K00026+K00026+K00026+K00026+K00030+K00031+K00031+K00033+K00036+K00036+K00036+K00036+K00036+K00036+K00036+K00036+K00036+K00058+K00058+K00058+K00059+K00059+K00059+K00059+K00059+K00059+K00059+K00083+K00083+…
ABC transporters	ko02010	108 out of 6135 1.76039119804401%	636 out of 69984 0.90877914951989%	2.68964e-11	3.65791e-09	Cluster-17563.11190;Cluster-17563.133593;Cluster-17563.2032;Cluster-17563.98602;Cluster-17563.129322;Cluster-17563.22170;Cluster-17563.34312;Cluster-17563.38434;Cluster-17563.46551;Cluster-17563.46558;Cluster-17563.50657;Cluster-17563.50658;Cluster-17563.52091;Cluster-17563.5711;Cluster-17563.61749;Cluster-17563.72312;Cluster-17563.73929;Cluster-17563.7694;Cluster-17563.84531;Cluster-17563.84532;…	K05641+K05643+K05643+K05655+K05656+K05658+K05658+K05658+K05658+K05658+K05658+K05658+K05658+K05658+K05658+K05658+K05658+K05658+K05658+K05658+K05658+K05658+K05658+K05658+K05658+K05658+K05658+K05658+K05658+K05658+K05658+K05665+K05665+K05665+K05665+K05665+K05665+K05666+K05666+K05666+K05666+K05666+K05666+K05666+K05666+K05666+K05666+K05666+K05666+K05666+K05666+K05666+K05666+K05666+K05666+K05666+K05666+…
DNA replication	ko03030	83 out of 6135 1.35289323553382%	799 out of 69984 1.14168952903521%	0.0611661	1	Cluster-17563.25745;Cluster-17563.44545;Cluster-17563.46208;Cluster-17563.57677;Cluster-17563.76343;Cluster-17563.89851;Cluster-17563.134353;Cluster-17563.42392;Cluster-17563.59885;Cluster-25759.0;Cluster-17563.20610;Cluster-36190.1;Cluster-17563.104997;Cluster-17563.104999;Cluster-17563.9602;Cluster-27097.0;Cluster-48883.0;Cluster-17563.132322;Cluster-15724.1;Cluster-17563.16732;Cluster-17563.20…	K02210+K02210+K02210+K02210+K02210+K02210+K02335+K02335+K02335+K02335+K02540+K02542+K03111+K03111+K03504+K03504+K04802+K07466+K07466+K07466+K07466+K07466+K07466+K07466+K07466+K07466+K07466+K07466+K07466+K07466+K07466+K07466+K07466+K07466+K07466+K07466+K07466+K07466+K07466+K07466+K07466+K07466+K07466+K07466+K07466+K07466+K07466+K07466+K07466+K07466+K07466+K07466+K07466+K07466+K07466+K07466+K07466+…
MAPK signaling pathway - plant	ko04016	287 out of 6135 4.67807660961695%	2759 out of 69984 3.94232967535437%	0.00135607	0.184425	Cluster-17563.50252;Cluster-17563.92260;Cluster-17563.110441;Cluster-17563.45217;Cluster-17563.51879;Cluster-17563.68070;Cluster-17563.68075;Cluster-17563.68643;Cluster-17563.73243;Cluster-17563.85453;Cluster-20434.0;Cluster-26758.0;Cluster-17563.112789;Cluster-17563.68795;Cluster-17563.70864;Cluster-17563.70865;Cluster-17563.70866;Cluster-35119.1;Cluster-17563.54233;Cluster-17563.65445;Cluster-1…	K00940+K00940+K00940+K02183+K02183+K02183+K02183+K02183+K02183+K02183+K02183+K02183+K02183+K03781+K03781+K03781+K03781+K03781+K13413+K13413+K13413+K13413+K13413+K13414+K13414+K13414+K13414+K13414+K13414+K13416+K13416+K13416+K13416+K13416+K13416+K13416+K13416+K13416+K13416+K13416+K13416+K13416+K13416+K13416+K13416+K13416+K13416+K13416+K13416+K13416+K13416+K13416+K13416+K13416+K13416+K13416+K13416+…
Glycolysis / Gluconeogenesis	ko00010	175 out of 6135 2.85248573757131%	1732 out of 69984 2.47485139460448%	0.0273676	1	Cluster-6152.0;Cluster-17563.46650;Cluster-17563.47290;Cluster-17563.60836;Cluster-17563.66579;Cluster-17563.74567;Cluster-5679.0;Cluster-17563.63778;Cluster-17563.63779;Cluster-17563.63780;Cluster-17563.84860;Cluster-17563.111664;Cluster-17563.119057;Cluster-17563.16506;Cluster-17563.22194;Cluster-17563.28370;Cluster-17563.31888;Cluster-17563.33155;Cluster-17563.38278;Cluster-17563.101343;Cluste…	K00001+K00002+K00002+K00002+K00002+K00002+K00002+K00121+K00121+K00121+K00121+K00121+K00121+K00128+K00128+K00128+K00128+K00128+K00128+K00128+K00128+K00128+K00128+K00128+K00128+K00128+K00128+K00128+K00128+K00128+K00128+K00128+K00128+K00128+K00131+K00131+K00131+K00134+K00134+K00134+K00161+K00161+K00161+K00161+K00161+K00162+K00162+K00382+K00382+K00382+K00382+K00382+K00382+K00382+K00627+K00627+K00627+…
Citrate cycle (TCA cycle)	ko00020	60 out of 6135 0.97799511002445%	768 out of 69984 1.09739368998628%	0.842446	1	Cluster-19556.0;Cluster-17563.50281;Cluster-17563.50285;Cluster-17563.58443;Cluster-17563.61341;Cluster-17563.73132;Cluster-17563.99753;Cluster-17563.62560;Cluster-17563.65979;Cluster-17563.104838;Cluster-17563.60497;Cluster-17563.64910;Cluster-17563.64925;Cluster-17563.77684;Cluster-17563.124334;Cluster-17563.98928;Cluster-17563.12828;Cluster-17563.53449;Cluster-17563.76625;Cluster-17563.62587;C…	K00025+K00026+K00026+K00026+K00026+K00026+K00026+K00030+K00031+K00031+K00161+K00161+K00161+K00161+K00161+K00162+K00162+K00234+K00234+K00235+K00235+K00382+K00382+K00382+K00382+K00382+K00382+K00382+K00627+K00627+K00627+K00627+K00627+K00627+K00627+K00627+K00627+K00627+K01610+K01610+K01610+K01610+K01647+K01647+K01647+K01648+K01648+K01648+K01648+K01648+K01679+K01679+K01679+K01681+K01681+K01899+K01900+…
Pentose phosphate pathway	ko00030	62 out of 6135 1.01059494702526%	768 out of 69984 1.09739368998628%	0.770281	1	Cluster-17563.67627;Cluster-17563.58085;Cluster-17563.64622;Cluster-17563.64796;Cluster-17563.67358;Cluster-17563.68861;Cluster-17563.72185;Cluster-17563.79519;Cluster-17563.85206;Cluster-17563.92902;Cluster-17563.61348;Cluster-28719.0;Cluster-17563.128450;Cluster-17563.69687;Cluster-17563.69976;Cluster-17563.69978;Cluster-17563.23597;Cluster-17563.25035;Cluster-17563.30369;Cluster-17563.30372;Cl…	K00033+K00036+K00036+K00036+K00036+K00036+K00036+K00036+K00036+K00036+K00131+K00131+K00131+K00616+K00616+K00616+K00850+K00850+K00850+K00850+K00850+K00850+K00850+K00850+K00850+K00850+K00850+K00850+K00895+K00895+K00895+K00895+K00948+K00948+K00948+K00948+K01057+K01057+K01057+K01057+K01057+K01623+K01623+K01623+K01623+K01783+K01783+K01783+K01783+K01783+K01783+K01807+K01807+K01807+K01810+K01810+K01810+…
Pentose and glucuronate interconversions	ko00040	101 out of 6135 1.64629176854116%	915 out of 69984 1.30744170096022%	0.0101388	1	Cluster-17563.46650;Cluster-17563.47290;Cluster-17563.60836;Cluster-17563.66579;Cluster-17563.74567;Cluster-5679.0;Cluster-17563.45017;Cluster-17563.53901;Cluster-17563.65092;Cluster-17563.65095;Cluster-17563.65096;Cluster-17563.70125;Cluster-17563.80983;Cluster-17563.93965;Cluster-17563.71954;Cluster-17563.71987;Cluster-17563.26780;Cluster-17563.63385;Cluster-17563.13057;Cluster-17563.20360;Clus…	K00002+K00002+K00002+K00002+K00002+K00002+K00008+K00008+K00008+K00008+K00008+K00008+K00008+K00008+K00012+K00012+K00963+K00963+K01051+K01051+K01051+K01051+K01051+K01051+K01051+K01051+K01051+K01051+K01051+K01051+K01051+K01051+K01051+K01051+K01051+K01051+K01051+K01051+K01051+K01051+K01051+K01051+K01051+K01051+K01051+K01051+K01051+K01051+K01051+K01051+K01051+K01051+K01184+K01184+K01184+K01184+K01184+…
Fructose and mannose metabolism	ko00051	67 out of 6135 1.0920945395273%	774 out of 69984 1.1059670781893%	0.561949	1	Cluster-17563.45017;Cluster-17563.53901;Cluster-17563.65092;Cluster-17563.65095;Cluster-17563.65096;Cluster-17563.70125;Cluster-17563.80983;Cluster-17563.93965;Cluster-17563.7164;Cluster-17563.74858;Cluster-17563.84590;Cluster-17563.85053;Cluster-37073.0;Cluster-17563.23597;Cluster-17563.25035;Cluster-17563.30369;Cluster-17563.30372;Cluster-17563.35983;Cluster-17563.57817;Cluster-17563.71979;Clus…	K00008+K00008+K00008+K00008+K00008+K00008+K00008+K00008+K00844+K00844+K00847+K00847+K00847+K00850+K00850+K00850+K00850+K00850+K00850+K00850+K00850+K00850+K00850+K00850+K00850+K00863+K00863+K00863+K00895+K00895+K00895+K00895+K00966+K00966+K00966+K01623+K01623+K01623+K01623+K01711+K01803+K01803+K01803+K01803+K01803+K01803+K01803+K01805+K01805+K01805+K01805+K01805+K01805+K01805+K01809+K01809+K03841+…
Galactose metabolism	ko00052	99 out of 6135 1.61369193154034%	741 out of 69984 1.0588134430727%	1.9112e-05	0.00259924	Cluster-17563.7164;Cluster-17563.74858;Cluster-17563.23597;Cluster-17563.25035;Cluster-17563.30369;Cluster-17563.30372;Cluster-17563.35983;Cluster-17563.57817;Cluster-17563.71979;Cluster-17563.81416;Cluster-17563.82777;Cluster-17563.89176;Cluster-17563.107762;Cluster-14185.0;Cluster-17563.26780;Cluster-17563.63385;Cluster-17563.25747;Cluster-17563.95476;Cluster-17563.129043;Cluster-17563.57690;Cl…	K00844+K00844+K00850+K00850+K00850+K00850+K00850+K00850+K00850+K00850+K00850+K00850+K00850+K00850+K00963+K00963+K01187+K01187+K01187+K01190+K01190+K01190+K01190+K01193+K01193+K01193+K01193+K01193+K01193+K01193+K01193+K01193+K01193+K01193+K01193+K01193+K01193+K01193+K01193+K01193+K01784+K01784+K01784+K01784+K01784+K01784+K01785+K01785+K01835+K06617+K06617+K06617+K06617+K06617+K06617+K06617+K07407+…
Ascorbate and aldarate metabolism	ko00053	76 out of 6135 1.23879380603097%	639 out of 69984 0.913065843621399%	0.00425056	0.578077	Cluster-17563.71954;Cluster-17563.71987;Cluster-17563.28818;Cluster-17563.42477;Cluster-17563.53639;Cluster-17563.97490;Cluster-17563.110127;Cluster-17563.112912;Cluster-17563.16506;Cluster-17563.22194;Cluster-17563.28370;Cluster-17563.31888;Cluster-17563.33155;Cluster-17563.38278;Cluster-17563.101343;Cluster-17563.4632;Cluster-17563.50547;Cluster-17563.55397;Cluster-17563.67344;Cluster-17563.676…	K00012+K00012+K00103+K00103+K00103+K00103+K00103+K00103+K00128+K00128+K00128+K00128+K00128+K00128+K00128+K00128+K00128+K00128+K00128+K00128+K00128+K00128+K00128+K00128+K00128+K00128+K00128+K00128+K00128+K00423+K00423+K00423+K00434+K00434+K00434+K00434+K00434+K00434+K00434+K00434+K00434+K00434+K00434+K00434+K00469+K00469+K08232+K08232+K08232+K08232+K08232+K08232+K08232+K08232+K08232+K10046+K10046+…
Fatty acid biosynthesis	ko00061	69 out of 6135 1.12469437652812%	548 out of 69984 0.783036122542295%	0.00156973	0.213483	Cluster-17563.1906;Cluster-17563.43102;Cluster-17563.54097;Cluster-17563.65305;Cluster-17563.73023;Cluster-17563.86703;Cluster-17563.94871;Cluster-17563.36624;Cluster-17563.42261;Cluster-17563.42263;Cluster-17563.66323;Cluster-17563.63768;Cluster-17563.21837;Cluster-17563.44807;Cluster-17563.102116;Cluster-17563.55547;Cluster-17563.55548;Cluster-17563.59439;Cluster-17563.64105;Cluster-17563.64108…	K00059+K00059+K00059+K00059+K00059+K00059+K00059+K00208+K00208+K00208+K00208+K00648+K01897+K01897+K01897+K01897+K01897+K01897+K01897+K01897+K01897+K01897+K01897+K01897+K01897+K01897+K01897+K01897+K01897+K01897+K01897+K01897+K01897+K01897+K01897+K01897+K01897+K01897+K01961+K01962+K01962+K01962+K02160+K02160+K02160+K02160+K02372+K03921+K03921+K03921+K03921+K03921+K03921+K09458+K09458+K09458+K09458+…
Fatty acid elongation	ko00062	40 out of 6135 0.6519967400163%	243 out of 69984 0.347222222222222%	8.28552e-05	0.0112683	Cluster-17563.38344;Cluster-17563.21023;Cluster-17563.66207;Cluster-17563.66208;Cluster-17563.73857;Cluster-17563.107033;Cluster-17563.94404;Cluster-17563.121912;Cluster-17563.129997;Cluster-17563.130000;Cluster-17563.53536;Cluster-17563.53551;Cluster-17563.64728;Cluster-17563.64730;Cluster-17563.64731;Cluster-17563.83438;Cluster-17563.101273;Cluster-17563.59749;Cluster-17563.105299;Cluster-17563…	K01068+K10249+K10251+K10251+K10251+K10251+K10251+K10251+K10251+K10251+K10258+K10258+K10258+K10258+K10258+K10258+K10703+K10703+K10703+K10703+K15397+K15397+K15397+K15397+K15397+K15397+K15397+K15397+K15397+K15397+K15397+K15397+K15397+K15397+K15397+K15397+K15397+K15397+K15397+K15397
Fatty acid degradation	ko00071	91 out of 6135 1.48329258353708%	736 out of 69984 1.05166895290352%	0.000586494	0.0797632	Cluster-6152.0;Cluster-17563.63778;Cluster-17563.63779;Cluster-17563.63780;Cluster-17563.84860;Cluster-17563.111664;Cluster-17563.119057;Cluster-17563.16506;Cluster-17563.22194;Cluster-17563.28370;Cluster-17563.31888;Cluster-17563.33155;Cluster-17563.38278;Cluster-17563.101343;Cluster-17563.4632;Cluster-17563.50547;Cluster-17563.55397;Cluster-17563.67344;Cluster-17563.67669;Cluster-17563.75579;Cl…	K00001+K00121+K00121+K00121+K00121+K00121+K00121+K00128+K00128+K00128+K00128+K00128+K00128+K00128+K00128+K00128+K00128+K00128+K00128+K00128+K00128+K00128+K00128+K00128+K00128+K00128+K00128+K00128+K00232+K00232+K00232+K00232+K00232+K00626+K00626+K01692+K01897+K01897+K01897+K01897+K01897+K01897+K01897+K01897+K01897+K01897+K01897+K01897+K01897+K01897+K01897+K01897+K01897+K01897+K01897+K01897+K01897+…
Synthesis and degradation of ketone bodies	ko00072	11 out of 6135 0.179299103504482%	106 out of 69984 0.151463191586648%	0.324962	1	Cluster-17563.68634;Cluster-17563.73796;Cluster-17563.28041;Cluster-17563.45582;Cluster-17563.104530;Cluster-17563.78624;Cluster-17563.70439;Cluster-17563.71218;Cluster-17563.71649;Cluster-17563.73596;Cluster-17563.73812	K00626+K00626+K01640+K01640+K01640+K01640+K01641+K01641+K01641+K01641+K01641
Cutin, suberine and wax biosynthesis	ko00073	47 out of 6135 0.766096169519152%	206 out of 69984 0.294352994970279%	9.46208e-10	1.28684e-07	Cluster-17563.69046;Cluster-17563.69048;Cluster-17563.69638;Cluster-17563.106822;Cluster-17563.106823;Cluster-17563.99563;Cluster-17563.132979;Cluster-17563.35524;Cluster-17563.41526;Cluster-17563.9159;Cluster-21725.0;Cluster-27207.0;Cluster-17563.4962;Cluster-23470.0;Cluster-17563.108776;Cluster-17563.38106;Cluster-17563.44006;Cluster-17563.50799;Cluster-17563.60833;Cluster-17563.76837;Cluster-1…	K13356+K13356+K15398+K15398+K15398+K15398+K15400+K15400+K15400+K15400+K15400+K15400+K15401+K15401+K15403+K15404+K15404+K15404+K15404+K15404+K15406+K15406+K15406+K15406+K15406+K15406+K15406+K15406+K17991+K20495+K20495+K20495+K20495+K20495+K20495+K20495+K20495+K20495+K20769+K20769+K20769+K20769+K21995+K21995+K21995+K21995+K21995
Steroid biosynthesis	ko00100	48 out of 6135 0.78239608801956%	344 out of 69984 0.491540923639689%	0.000946072	0.128666	Cluster-17563.49748;Cluster-17563.79170;Cluster-17563.130801;Cluster-17563.22086;Cluster-17563.31800;Cluster-17563.46921;Cluster-17563.77084;Cluster-17563.86722;Cluster-17563.96132;Cluster-17563.128013;Cluster-17563.21969;Cluster-17563.24710;Cluster-17563.27612;Cluster-17563.61632;Cluster-17563.61633;Cluster-17563.106160;Cluster-17563.123337;Cluster-17563.60994;Cluster-17563.71916;Cluster-17563.1…	K00213+K00213+K00511+K00511+K00511+K00511+K00511+K00511+K00511+K00511+K00559+K00559+K00559+K00559+K00559+K00559+K00559+K00801+K00801+K01052+K01052+K01052+K01052+K01052+K01052+K01052+K01052+K01052+K01052+K01052+K01052+K01052+K01052+K01052+K01853+K01853+K01853+K01853+K08242+K08246+K08246+K09828+K09828+K09828+K09828+K14424+K14424+K14424
Ubiquinone and other terpenoid-quinone biosynthesis	ko00130	43 out of 6135 0.700896495517522%	388 out of 69984 0.554412437128487%	0.0668814	1	Cluster-17563.65179;Cluster-17563.18361;Cluster-17563.65873;Cluster-17563.65875;Cluster-17563.68423;Cluster-17563.80171;Cluster-17563.80348;Cluster-17563.82419;Cluster-17563.104686;Cluster-17563.1955;Cluster-3393.0;Cluster-17563.9458;Cluster-17563.133554;Cluster-17563.63260;Cluster-17563.72813;Cluster-17563.83229;Cluster-17563.85891;Cluster-17563.127404;Cluster-17563.46084;Cluster-32885.0;Cluster…	K00457+K00487+K00487+K00487+K00487+K00487+K00487+K00487+K00591+K00815+K00815+K01661+K01904+K01904+K01904+K01904+K01904+K01904+K02552+K02552+K03809+K05928+K06125+K06126+K09833+K09833+K09833+K09834+K09834+K09834+K09834+K09834+K12501+K12501+K12501+K12502+K12502+K12502+K12502+K14759+K14760+K19222+K19222
Oxidative phosphorylation	ko00190	105 out of 6135 1.71149144254279%	1603 out of 69984 2.2905235482396%	0.999586	1	Cluster-17563.53449;Cluster-17563.76625;Cluster-17563.62587;Cluster-17563.75880;Cluster-17563.47938;Cluster-17563.66468;Cluster-17563.62409;Cluster-17563.76462;Cluster-17563.39844;Cluster-17563.51107;Cluster-17563.57866;Cluster-17563.67521;Cluster-17563.68681;Cluster-17563.75842;Cluster-28582.0;Cluster-17563.41788;Cluster-17563.46380;Cluster-17563.51683;Cluster-17563.51684;Cluster-17563.52459;Clu…	K00234+K00234+K00235+K00235+K00413+K00416+K00417+K00417+K01507+K01507+K01507+K01507+K01507+K01507+K01507+K01535+K01535+K01535+K01535+K01535+K01535+K01535+K01535+K01535+K01535+K01535+K02109+K02109+K02109+K02111+K02111+K02111+K02112+K02113+K02113+K02115+K02126+K02132+K02133+K02133+K02133+K02134+K02134+K02134+K02138+K02138+K02145+K02145+K02145+K02145+K02145+K02148+K02149+K02153+K02153+K02153+K02153+…
Photosynthesis - antenna proteins	ko00196	27 out of 6135 0.440097799511002%	80 out of 69984 0.114311842706904%	4.00141e-10	5.44192e-08	Cluster-17563.68130;Cluster-17563.96735;Cluster-17563.66193;Cluster-17563.92182;Cluster-34448.0;Cluster-17563.114489;Cluster-17563.45297;Cluster-17563.49703;Cluster-17563.81083;Cluster-17563.107485;Cluster-17563.125515;Cluster-17563.40610;Cluster-17563.61759;Cluster-17563.67857;Cluster-17563.71364;Cluster-17563.74580;Cluster-17563.79694;Cluster-17563.91140;Cluster-17563.55145;Cluster-17563.63247;…	K08907+K08907+K08908+K08908+K08908+K08908+K08909+K08909+K08910+K08910+K08910+K08911+K08912+K08912+K08912+K08912+K08912+K08914+K08915+K08915+K08915+K08915+K08915+K08915+K08917+K08917+K08917
Arginine biosynthesis	ko00220	25 out of 6135 0.407497962510187%	401 out of 69984 0.572988111568358%	0.974984	1	Cluster-17563.94509;Cluster-25887.0;Cluster-17563.114720;Cluster-17563.88575;Cluster-17563.97792;Cluster-17563.100348;Cluster-42218.0;Cluster-17563.12184;Cluster-13775.0;Cluster-17563.50015;Cluster-17563.45800;Cluster-17563.87209;Cluster-17563.115519;Cluster-17563.48973;Cluster-17563.79973;Cluster-17563.132711;Cluster-17563.34397;Cluster-17563.70899;Cluster-17563.79012;Cluster-17563.79974;Cluster…	K00261+K00261+K00261+K00620+K00620+K00818+K01427+K01427+K01427+K01438+K01476+K01755+K01755+K01915+K01940+K14272+K14272+K14272+K14272+K14272+K14272+K14454+K14677+K14682+K14682
Purine metabolism	ko00230	100 out of 6135 1.62999185004075%	1228 out of 69984 1.75468678555098%	0.795475	1	Cluster-17563.100866;Cluster-17563.13000;Cluster-17563.6979;Cluster-17563.7794;Cluster-17563.51695;Cluster-17563.62888;Cluster-28105.0;Cluster-17563.77970;Cluster-17563.89397;Cluster-13040.0;Cluster-17563.42264;Cluster-4048.0;Cluster-17563.15391;Cluster-17563.16533;Cluster-17563.36765;Cluster-17563.71595;Cluster-17563.26294;Cluster-17563.39600;Cluster-17563.42751;Cluster-17563.105726;Cluster-1756…	K00088+K00088+K00365+K00602+K00759+K00759+K00759+K00760+K00760+K00760+K00764+K00764+K00856+K00856+K00856+K00856+K00860+K00860+K00860+K00860+K00860+K00860+K00860+K00860+K00873+K00873+K00873+K00873+K00873+K00873+K00873+K00873+K00939+K00939+K00939+K00940+K00940+K00940+K00942+K00942+K00948+K00948+K00948+K00948+K00951+K00951+K01081+K01081+K01081+K01427+K01427+K01427+K01466+K01466+K01466+K01466+K01488+…
Caffeine metabolism	ko00232	1 out of 6135 0.0162999185004075%	36 out of 69984 0.051440329218107%	0.963253	1	Cluster-17563.6979	K00365
Pyrimidine metabolism	ko00240	52 out of 6135 0.84759576202119%	632 out of 69984 0.903063557384545%	0.704727	1	Cluster-17563.46976;Cluster-33264.0;Cluster-17563.19754;Cluster-17563.25606;Cluster-17563.28398;Cluster-17563.42400;Cluster-17563.44307;Cluster-17563.44309;Cluster-17563.102983;Cluster-17563.63614;Cluster-17563.8383;Cluster-17563.91608;Cluster-17563.92098;Cluster-31252.0;Cluster-17563.50252;Cluster-17563.92260;Cluster-17563.110441;Cluster-17563.7356;Cluster-17563.122569;Cluster-17563.127562;Clust…	K00207+K00857+K00876+K00876+K00876+K00876+K00876+K00876+K00876+K00876+K00876+K00876+K00876+K00876+K00940+K00940+K00940+K01081+K01081+K01081+K01240+K01240+K01240+K01510+K01510+K01510+K01510+K01513+K01513+K01513+K01520+K01937+K01937+K01937+K01937+K01956+K06966+K06966+K06966+K09903+K09903+K09903+K10807+K10808+K13800+K13800+K13998+K13998+K13998+K13998+K13998+K14641
Alanine, aspartate and glutamate metabolism	ko00250	49 out of 6135 0.798696006519967%	567 out of 69984 0.810185185185185%	0.563556	1	Cluster-17563.94509;Cluster-25887.0;Cluster-17563.114720;Cluster-17563.116508;Cluster-17563.116510;Cluster-17563.45398;Cluster-17563.45399;Cluster-17563.86282;Cluster-17563.121222;Cluster-17563.42264;Cluster-4048.0;Cluster-17563.57525;Cluster-17563.27481;Cluster-17563.48488;Cluster-17563.55052;Cluster-17563.66155;Cluster-17563.79643;Cluster-17563.70300;Cluster-17563.87209;Cluster-17563.115519;Clu…	K00261+K00261+K00261+K00278+K00278+K00294+K00294+K00294+K00294+K00764+K00764+K00827+K00830+K00830+K00830+K00830+K00830+K01580+K01755+K01755+K01915+K01939+K01939+K01939+K01940+K01953+K01953+K01953+K01953+K01953+K01953+K01953+K01953+K01953+K01953+K01953+K01956+K13051+K13051+K13051+K14272+K14272+K14272+K14272+K14272+K14272+K14454+K16871+K17761
Glycine, serine and threonine metabolism	ko00260	96 out of 6135 1.56479217603912%	710 out of 69984 1.01451760402378%	1.57486e-05	0.00214181	Cluster-17563.104365;Cluster-17563.71238;Cluster-17563.71526;Cluster-17563.77761;Cluster-17563.29622;Cluster-17563.52618;Cluster-17563.68033;Cluster-18934.0;Cluster-17563.30644;Cluster-17563.55308;Cluster-17563.65490;Cluster-17563.88054;Cluster-38111.0;Cluster-17563.128145;Cluster-17563.39872;Cluster-17563.49882;Cluster-17563.54126;Cluster-17563.72302;Cluster-17563.129260;Cluster-17563.70468;Clus…	K00003+K00058+K00058+K00058+K00108+K00130+K00130+K00130+K00276+K00276+K00276+K00276+K00276+K00276+K00281+K00281+K00281+K00281+K00281+K00306+K00306+K00382+K00382+K00382+K00382+K00382+K00382+K00382+K00499+K00600+K00600+K00600+K00600+K00600+K00600+K00600+K00600+K00600+K00600+K00600+K00600+K00600+K00600+K00600+K00600+K00600+K00600+K00605+K00605+K00605+K00605+K00827+K00830+K00830+K00830+K00830+K00830+…
Monobactam biosynthesis	ko00261	2 out of 6135 0.032599837000815%	94 out of 69984 0.134316415180613%	0.998205	1	Cluster-17563.38082;Cluster-17563.3966	K01714+K12524
Cysteine and methionine metabolism	ko00270	92 out of 6135 1.49959250203749%	858 out of 69984 1.22599451303155%	0.0264763	1	Cluster-17563.104365;Cluster-19556.0;Cluster-17563.50281;Cluster-17563.50285;Cluster-17563.58443;Cluster-17563.61341;Cluster-17563.73132;Cluster-17563.99753;Cluster-17563.71238;Cluster-17563.71526;Cluster-17563.77761;Cluster-17563.131869;Cluster-17563.47540;Cluster-15148.0;Cluster-17563.109665;Cluster-17563.110341;Cluster-36923.0;Cluster-43616.0;Cluster-17563.125131;Cluster-17563.45139;Cluster-17…	K00003+K00025+K00026+K00026+K00026+K00026+K00026+K00026+K00058+K00058+K00058+K00547+K00547+K00558+K00558+K00558+K00558+K00558+K00558+K00640+K00640+K00640+K00640+K00640+K00640+K00640+K00640+K00640+K00640+K00640+K00641+K00789+K00789+K00789+K00789+K00789+K00789+K00789+K00789+K00789+K00789+K00789+K00797+K00797+K00797+K00797+K00815+K00815+K00826+K00826+K00826+K00826+K00827+K00831+K00837+K00899+K00899+…
Valine, leucine and isoleucine degradation	ko00280	89 out of 6135 1.45069274653627%	887 out of 69984 1.2674325560128%	0.101273	1	Cluster-16942.0;Cluster-17563.65468;Cluster-17563.65473;Cluster-17563.67377;Cluster-17563.68511;Cluster-17563.68512;Cluster-17563.68514;Cluster-17563.72503;Cluster-17563.73247;Cluster-17563.73298;Cluster-17563.73924;Cluster-17563.73926;Cluster-17563.78342;Cluster-17563.16506;Cluster-17563.22194;Cluster-17563.28370;Cluster-17563.31888;Cluster-17563.33155;Cluster-17563.38278;Cluster-17563.101343;Cl…	K00020+K00020+K00020+K00020+K00020+K00020+K00020+K00020+K00020+K00020+K00020+K00020+K00020+K00128+K00128+K00128+K00128+K00128+K00128+K00128+K00128+K00128+K00128+K00128+K00128+K00128+K00128+K00128+K00128+K00128+K00128+K00128+K00128+K00128+K00253+K00253+K00382+K00382+K00382+K00382+K00382+K00382+K00382+K00626+K00626+K00826+K00826+K00826+K00826+K00827+K01640+K01640+K01640+K01640+K01641+K01641+K01641+…
Valine, leucine and isoleucine biosynthesis	ko00290	19 out of 6135 0.309698451507742%	164 out of 69984 0.234339277549154%	0.128813	1	Cluster-17563.37744;Cluster-17563.46154;Cluster-17563.86932;Cluster-48198.0;Cluster-17563.15348;Cluster-17563.40590;Cluster-17563.53824;Cluster-17563.111440;Cluster-13620.0;Cluster-17563.49240;Cluster-17563.70531;Cluster-17563.90390;Cluster-17563.36515;Cluster-17563.49465;Cluster-17563.99614;Cluster-9536.0;Cluster-17563.74356;Cluster-17563.80734;Cluster-19471.0	K00826+K00826+K00826+K00826+K01649+K01649+K01649+K01649+K01649+K01652+K01652+K01652+K01653+K01653+K01687+K01687+K01703+K01754+K01754
Lysine biosynthesis	ko00300	10 out of 6135 0.162999185004075%	99 out of 69984 0.141460905349794%	0.36822	1	Cluster-17563.104365;Cluster-17563.68673;Cluster-17563.38082;Cluster-17563.130598;Cluster-17563.132294;Cluster-17563.51017;Cluster-17563.55192;Cluster-17563.83041;Cluster-17563.128779;Cluster-17563.3966	K00003+K01586+K01714+K10206+K10206+K10206+K10206+K10206+K10206+K12524
Lysine degradation	ko00310	56 out of 6135 0.91279543602282%	491 out of 69984 0.701588934613626%	0.0262826	1	Cluster-17563.16506;Cluster-17563.22194;Cluster-17563.28370;Cluster-17563.31888;Cluster-17563.33155;Cluster-17563.38278;Cluster-17563.101343;Cluster-17563.4632;Cluster-17563.50547;Cluster-17563.55397;Cluster-17563.67344;Cluster-17563.67669;Cluster-17563.75579;Cluster-17563.78498;Cluster-17563.7969;Cluster-17563.82962;Cluster-17563.84271;Cluster-17563.84559;Cluster-17563.9196;Cluster-28121.0;Clust…	K00128+K00128+K00128+K00128+K00128+K00128+K00128+K00128+K00128+K00128+K00128+K00128+K00128+K00128+K00128+K00128+K00128+K00128+K00128+K00128+K00128+K00306+K00306+K00382+K00382+K00382+K00382+K00382+K00382+K00382+K00626+K00626+K01692+K11420+K11420+K11420+K11420+K11420+K11420+K11420+K11420+K11420+K11420+K11422+K11422+K11422+K11422+K11422+K11422+K11423+K11426+K11430+K14085+K14085+K14157+K14157
Arginine and proline metabolism	ko00330	68 out of 6135 1.10839445802771%	660 out of 69984 0.943072702331962%	0.0933193	1	Cluster-17563.16506;Cluster-17563.22194;Cluster-17563.28370;Cluster-17563.31888;Cluster-17563.33155;Cluster-17563.38278;Cluster-17563.101343;Cluster-17563.4632;Cluster-17563.50547;Cluster-17563.55397;Cluster-17563.67344;Cluster-17563.67669;Cluster-17563.75579;Cluster-17563.78498;Cluster-17563.7969;Cluster-17563.82962;Cluster-17563.84271;Cluster-17563.84559;Cluster-17563.9196;Cluster-28121.0;Clust…	K00128+K00128+K00128+K00128+K00128+K00128+K00128+K00128+K00128+K00128+K00128+K00128+K00128+K00128+K00128+K00128+K00128+K00128+K00128+K00128+K00128+K00294+K00294+K00294+K00294+K00318+K00318+K00318+K00318+K00318+K00472+K00472+K00472+K00472+K00472+K00472+K00472+K00797+K00797+K00797+K00797+K00819+K00819+K01259+K01259+K01426+K01426+K01426+K01426+K01426+K01426+K01426+K01426+K01426+K01426+K01426+K01476+…
Histidine metabolism	ko00340	34 out of 6135 0.554197229013855%	306 out of 69984 0.437242798353909%	0.0912686	1	Cluster-16024.0;Cluster-25739.0;Cluster-17563.16506;Cluster-17563.22194;Cluster-17563.28370;Cluster-17563.31888;Cluster-17563.33155;Cluster-17563.38278;Cluster-17563.101343;Cluster-17563.4632;Cluster-17563.50547;Cluster-17563.55397;Cluster-17563.67344;Cluster-17563.67669;Cluster-17563.75579;Cluster-17563.78498;Cluster-17563.7969;Cluster-17563.82962;Cluster-17563.84271;Cluster-17563.84559;Cluster-…	K00013+K00013+K00128+K00128+K00128+K00128+K00128+K00128+K00128+K00128+K00128+K00128+K00128+K00128+K00128+K00128+K00128+K00128+K00128+K00128+K00128+K00128+K00128+K00765+K00765+K00765+K01590+K01663+K11755+K14085+K14085+K14152+K14152+K19787
Tyrosine metabolism	ko00350	45 out of 6135 0.733496332518337%	508 out of 69984 0.725880201188843%	0.493523	1	Cluster-6152.0;Cluster-17563.63778;Cluster-17563.63779;Cluster-17563.63780;Cluster-17563.84860;Cluster-17563.111664;Cluster-17563.119057;Cluster-17563.30644;Cluster-17563.55308;Cluster-17563.65490;Cluster-17563.88054;Cluster-38111.0;Cluster-17563.128145;Cluster-17563.33739;Cluster-17563.104124;Cluster-17563.67979;Cluster-17563.97757;Cluster-17563.81907;Cluster-17563.65179;Cluster-17563.1955;Clust…	K00001+K00121+K00121+K00121+K00121+K00121+K00121+K00276+K00276+K00276+K00276+K00276+K00276+K00422+K00422+K00422+K00422+K00451+K00457+K00815+K00815+K01555+K01555+K01593+K01593+K01593+K01593+K01593+K01800+K01800+K01800+K01800+K02510+K02510+K07253+K14454+K18857+K18857+K18857+K18857+K18857+K18857+K18857+K18857+K18857
Phenylalanine metabolism	ko00360	38 out of 6135 0.619396903015485%	374 out of 69984 0.534407864654778%	0.191874	1	Cluster-17563.49773;Cluster-17563.81741;Cluster-17563.96566;Cluster-17563.30644;Cluster-17563.55308;Cluster-17563.65490;Cluster-17563.88054;Cluster-38111.0;Cluster-17563.128145;Cluster-17563.65179;Cluster-17563.1955;Cluster-3393.0;Cluster-17563.134454;Cluster-17563.16282;Cluster-17563.43854;Cluster-17563.43869;Cluster-17563.102563;Cluster-17563.62585;Cluster-17563.6353;Cluster-17563.97526;Cluster…	K00074+K00074+K00074+K00276+K00276+K00276+K00276+K00276+K00276+K00457+K00815+K00815+K01426+K01426+K01426+K01426+K01426+K01426+K01426+K01426+K01426+K01426+K01426+K01593+K01593+K01593+K01593+K01593+K01692+K07253+K10775+K10775+K10775+K10775+K10775+K10775+K10775+K14454
Tryptophan metabolism	ko00380	75 out of 6135 1.22249388753056%	761 out of 69984 1.08739140374943%	0.157657	1	Cluster-17563.16506;Cluster-17563.22194;Cluster-17563.28370;Cluster-17563.31888;Cluster-17563.33155;Cluster-17563.38278;Cluster-17563.101343;Cluster-17563.4632;Cluster-17563.50547;Cluster-17563.55397;Cluster-17563.67344;Cluster-17563.67669;Cluster-17563.75579;Cluster-17563.78498;Cluster-17563.7969;Cluster-17563.82962;Cluster-17563.84271;Cluster-17563.84559;Cluster-17563.9196;Cluster-28121.0;Clust…	K00128+K00128+K00128+K00128+K00128+K00128+K00128+K00128+K00128+K00128+K00128+K00128+K00128+K00128+K00128+K00128+K00128+K00128+K00128+K00128+K00128+K00382+K00382+K00382+K00382+K00382+K00382+K00382+K00626+K00626+K00837+K01426+K01426+K01426+K01426+K01426+K01426+K01426+K01426+K01426+K01426+K01426+K01593+K01593+K01593+K01593+K01593+K01692+K03781+K03781+K03781+K03781+K03781+K07408+K07410+K11816+K11816+…
Phenylalanine, tyrosine and tryptophan biosynthesis	ko00400	49 out of 6135 0.798696006519967%	504 out of 69984 0.720164609053498%	0.24383	1	Cluster-17563.65327;Cluster-17563.82884;Cluster-17563.1955;Cluster-3393.0;Cluster-17563.42065;Cluster-17563.45867;Cluster-17563.4816;Cluster-17563.65544;Cluster-17563.65546;Cluster-17563.96915;Cluster-17563.81769;Cluster-17563.45759;Cluster-17563.47679;Cluster-17563.60549;Cluster-17563.74979;Cluster-17563.76423;Cluster-17563.76425;Cluster-46587.0;Cluster-17563.70231;Cluster-17563.86152;Cluster-17…	K00800+K00800+K00815+K00815+K00891+K00891+K00891+K00891+K00891+K00891+K01609+K01626+K01626+K01626+K01626+K01626+K01626+K01626+K01657+K01657+K01658+K01695+K01696+K01696+K01735+K01736+K01736+K01736+K01736+K01850+K01850+K01850+K01850+K01850+K01850+K05359+K05359+K13832+K13832+K13832+K13832+K13832+K13832+K13832+K13832+K13832+K13832+K13832+K14454
Benzoxazinoid biosynthesis	ko00402	20 out of 6135 0.32599837000815%	81 out of 69984 0.115740740740741%	1.69704e-05	0.00230798	Cluster-17563.110333;Cluster-17563.117339;Cluster-17563.47876;Cluster-17563.50767;Cluster-17563.61836;Cluster-17563.66505;Cluster-17563.70986;Cluster-17563.71128;Cluster-17563.71130;Cluster-17563.74488;Cluster-17563.7536;Cluster-17563.77020;Cluster-17563.84945;Cluster-17563.88448;Cluster-17563.89532;Cluster-26907.0;Cluster-37793.0;Cluster-17563.116904;Cluster-17563.129858;Cluster-17563.129862	K13227+K13227+K13229+K13229+K13229+K13229+K13229+K13229+K13229+K13229+K13229+K13229+K13229+K13229+K13229+K13229+K13229+K13229+K13229+K13229
beta-Alanine metabolism	ko00410	56 out of 6135 0.91279543602282%	616 out of 69984 0.880201188843164%	0.407888	1	Cluster-17563.16506;Cluster-17563.22194;Cluster-17563.28370;Cluster-17563.31888;Cluster-17563.33155;Cluster-17563.38278;Cluster-17563.101343;Cluster-17563.4632;Cluster-17563.50547;Cluster-17563.55397;Cluster-17563.67344;Cluster-17563.67669;Cluster-17563.75579;Cluster-17563.78498;Cluster-17563.7969;Cluster-17563.82962;Cluster-17563.84271;Cluster-17563.84559;Cluster-17563.9196;Cluster-28121.0;Clust…	K00128+K00128+K00128+K00128+K00128+K00128+K00128+K00128+K00128+K00128+K00128+K00128+K00128+K00128+K00128+K00128+K00128+K00128+K00128+K00128+K00128+K00207+K00232+K00232+K00232+K00232+K00232+K00276+K00276+K00276+K00276+K00276+K00276+K01580+K01692+K01918+K01918+K05605+K05605+K05605+K05605+K05605+K05605+K05605+K05605+K05605+K05605+K05605+K05605+K05605+K05605+K05605+K14085+K14085+K17839+K17839
Taurine and hypotaurine metabolism	ko00430	3 out of 6135 0.0488997555012225%	84 out of 69984 0.12002743484225%	0.981491	1	Cluster-17563.70300;Cluster-17563.18620;Cluster-37929.0	K01580+K10712+K10712
Phosphonate and phosphinate metabolism	ko00440	9 out of 6135 0.146699266503667%	75 out of 69984 0.107167352537723%	0.209139	1	Cluster-17563.101094;Cluster-17563.69024;Cluster-17563.69367;Cluster-17563.72781;Cluster-17563.109143;Cluster-17563.108138;Cluster-17563.109375;Cluster-17563.122540;Cluster-10557.0	K00967+K00967+K00967+K00967+K00967+K00968+K00968+K00968+K00993
Selenocompound metabolism	ko00450	11 out of 6135 0.179299103504482%	183 out of 69984 0.261488340192044%	0.93327	1	Cluster-17563.14236;Cluster-17563.16149;Cluster-17563.36131;Cluster-17563.57662;Cluster-17563.108704;Cluster-20979.0;Cluster-17563.50884;Cluster-17563.55855;Cluster-17563.40851;Cluster-17563.108972;Cluster-17563.90710	K00384+K00384+K00384+K00384+K00384+K01739+K01760+K01760+K01874+K01874+K08247
Cyanoamino acid metabolism	ko00460	55 out of 6135 0.896495517522412%	454 out of 69984 0.648719707361683%	0.00935152	1	Cluster-17563.32996;Cluster-17563.33830;Cluster-17563.45349;Cluster-17563.60698;Cluster-17563.64935;Cluster-17563.68099;Cluster-17563.70057;Cluster-17563.105345;Cluster-17563.73869;Cluster-17563.88614;Cluster-17563.96285;Cluster-17563.96920;Cluster-17563.97622;Cluster-17563.99142;Cluster-27283.0;Cluster-17563.112040;Cluster-17563.115533;Cluster-17563.127855;Cluster-17563.132938;Cluster-17563.1329…	K00600+K00600+K00600+K00600+K00600+K00600+K00600+K00600+K00600+K00600+K00600+K00600+K00600+K00600+K00600+K00600+K00600+K00600+K01188+K01188+K01188+K01188+K01188+K01188+K01188+K01188+K01188+K01188+K01188+K01455+K01455+K01455+K01455+K01455+K05349+K05349+K05349+K05349+K05349+K05350+K08248+K08248+K08248+K08248+K08248+K12153+K13051+K13051+K13051+K16266+K16266+K20802+K20802+K20802+K20802
Glutathione metabolism	ko00480	133 out of 6135 2.1678891605542%	911 out of 69984 1.30172610882487%	4.68576e-09	6.37263e-07	Cluster-17563.65979;Cluster-17563.104838;Cluster-17563.67627;Cluster-17563.58085;Cluster-17563.64622;Cluster-17563.64796;Cluster-17563.67358;Cluster-17563.68861;Cluster-17563.72185;Cluster-17563.79519;Cluster-17563.85206;Cluster-17563.92902;Cluster-17563.60617;Cluster-17563.70679;Cluster-17563.18510;Cluster-17563.39280;Cluster-17563.4281;Cluster-17563.54302;Cluster-17563.56213;Cluster-17563.69110…	K00031+K00031+K00033+K00036+K00036+K00036+K00036+K00036+K00036+K00036+K00036+K00036+K00383+K00383+K00432+K00432+K00432+K00432+K00432+K00432+K00432+K00432+K00432+K00434+K00434+K00434+K00434+K00434+K00434+K00434+K00434+K00434+K00434+K00434+K00434+K00797+K00797+K00797+K00797+K00799+K00799+K00799+K00799+K00799+K00799+K00799+K00799+K00799+K00799+K00799+K00799+K00799+K00799+K00799+K00799+K00799+K00799+…
Starch and sucrose metabolism	ko00500	278 out of 6135 4.53137734311328%	2879 out of 69984 4.11379743941472%	0.0469152	1	Cluster-17563.103714;Cluster-17563.113080;Cluster-17563.127883;Cluster-17563.131853;Cluster-17563.15718;Cluster-17563.15797;Cluster-17563.1851;Cluster-17563.18573;Cluster-17563.18912;Cluster-17563.23133;Cluster-17563.23390;Cluster-17563.24128;Cluster-17563.24627;Cluster-17563.25549;Cluster-17563.25878;Cluster-17563.26033;Cluster-17563.26311;Cluster-17563.27088;Cluster-17563.27855;Cluster-17563.28…	K00688+K00688+K00688+K00695+K00695+K00695+K00695+K00695+K00695+K00695+K00695+K00695+K00695+K00695+K00695+K00695+K00695+K00695+K00695+K00695+K00695+K00695+K00695+K00695+K00695+K00695+K00695+K00695+K00695+K00695+K00695+K00695+K00695+K00695+K00695+K00695+K00695+K00695+K00695+K00695+K00695+K00695+K00695+K00695+K00695+K00695+K00695+K00695+K00695+K00695+K00695+K00695+K00695+K00695+K00695+K00695+K00695+…
N-Glycan biosynthesis	ko00510	51 out of 6135 0.831295843520782%	483 out of 69984 0.690157750342936%	0.0962414	1	Cluster-19872.0;Cluster-39276.0;Cluster-41233.0;Cluster-17563.83805;Cluster-17563.83806;Cluster-17563.41468;Cluster-17563.41472;Cluster-17563.41476;Cluster-17563.44286;Cluster-17563.99617;Cluster-17563.53257;Cluster-17563.53258;Cluster-17563.53260;Cluster-17563.63538;Cluster-17563.8449;Cluster-17563.92397;Cluster-11710.0;Cluster-17563.743;Cluster-17563.23760;Cluster-17563.40502;Cluster-2946.0;Clu…	K00726+K00726+K00726+K00729+K00729+K00736+K00736+K00736+K00736+K00736+K00737+K00737+K00737+K00737+K00737+K00737+K00737+K00779+K00902+K00902+K01001+K01228+K01228+K01228+K01228+K01230+K01230+K01230+K01230+K01230+K01230+K01230+K01230+K01230+K01230+K01230+K01230+K03844+K03845+K05546+K05546+K12345+K12345+K12666+K12666+K12666+K12666+K12666+K12666+K12667+K12667
Other glycan degradation	ko00511	65 out of 6135 1.05949470252649%	453 out of 69984 0.647290809327846%	6.05583e-05	0.00823592	Cluster-17563.57690;Cluster-17563.72858;Cluster-17563.80934;Cluster-17563.80935;Cluster-17563.19595;Cluster-17563.2863;Cluster-17563.44346;Cluster-17563.50840;Cluster-17563.1036;Cluster-17563.64330;Cluster-17563.74903;Cluster-17563.84101;Cluster-34437.0;Cluster-17563.119452;Cluster-17563.13900;Cluster-17026.0;Cluster-17563.30578;Cluster-17563.34534;Cluster-17563.43959;Cluster-17563.46144;Cluster-…	K01190+K01190+K01190+K01190+K01191+K01191+K01191+K01191+K01191+K01191+K01191+K01191+K01191+K01191+K01206+K01206+K01206+K01206+K01206+K01206+K01206+K01206+K01206+K01206+K01206+K01206+K12309+K12309+K12309+K12309+K12309+K12309+K12309+K12309+K12309+K12309+K12309+K12309+K12309+K12309+K12309+K12309+K12309+K12309+K12309+K12309+K12309+K12309+K12309+K12309+K12309+K12309+K12309+K12309+K12309+K12309+K12309+…
Various types of N-glycan biosynthesis	ko00513	36 out of 6135 0.58679706601467%	343 out of 69984 0.490112025605853%	0.149479	1	Cluster-19872.0;Cluster-39276.0;Cluster-41233.0;Cluster-17563.41468;Cluster-17563.41472;Cluster-17563.41476;Cluster-17563.44286;Cluster-17563.99617;Cluster-17563.67830;Cluster-17563.21572;Cluster-17563.35959;Cluster-17563.43478;Cluster-17563.45562;Cluster-17563.5358;Cluster-17563.53818;Cluster-17563.5518;Cluster-17563.91953;Cluster-17563.109101;Cluster-22649.0;Cluster-27306.0;Cluster-17563.11656;…	K00726+K00726+K00726+K00736+K00736+K00736+K00736+K00736+K00753+K01230+K01230+K01230+K01230+K01230+K01230+K01230+K01230+K01230+K01230+K01230+K01230+K03714+K03714+K03844+K03845+K12373+K12666+K12666+K12666+K12666+K12666+K12666+K12667+K12667+K14412+K14413
Other types of O-glycan biosynthesis	ko00514	14 out of 6135 0.228198859005705%	158 out of 69984 0.225765889346136%	0.523945	1	Cluster-17563.743;Cluster-17563.54100;Cluster-17563.65312;Cluster-17563.45182;Cluster-17563.54236;Cluster-17563.60188;Cluster-17563.118734;Cluster-45010.0;Cluster-17563.11922;Cluster-17563.74739;Cluster-17563.57429;Cluster-17563.78727;Cluster-17563.107005;Cluster-17563.124893	K00779+K03691+K03691+K09667+K09667+K09667+K18134+K20781+K20781+K20782+K20783+K20784+K20784+K20784
Amino sugar and nucleotide sugar metabolism	ko00520	138 out of 6135 2.24938875305623%	1394 out of 69984 1.99188385916781%	0.0735125	1	Cluster-17563.71954;Cluster-17563.71987;Cluster-17563.8326;Cluster-17563.93596;Cluster-17563.44924;Cluster-27227.0;Cluster-17563.7164;Cluster-17563.74858;Cluster-17563.84590;Cluster-17563.85053;Cluster-37073.0;Cluster-17563.26780;Cluster-17563.63385;Cluster-17563.59321;Cluster-17563.117898;Cluster-17563.121280;Cluster-17563.33717;Cluster-17563.15536;Cluster-17563.20668;Cluster-17563.34425;Cluster…	K00012+K00012+K00326+K00326+K00770+K00790+K00844+K00844+K00847+K00847+K00847+K00963+K00963+K00966+K00966+K00966+K00972+K00975+K00975+K00975+K00975+K00975+K00975+K00975+K00975+K00975+K00975+K00975+K00975+K00975+K00975+K00975+K00975+K00975+K01183+K01183+K01183+K01183+K01183+K01183+K01183+K01183+K01183+K01183+K01183+K01183+K01183+K01183+K01183+K01183+K01183+K01183+K01183+K01183+K01183+K01183+K01183+…
Glycosaminoglycan degradation	ko00531	41 out of 6135 0.668296658516707%	326 out of 69984 0.465820759030636%	0.01254	1	Cluster-17563.35254;Cluster-17563.62945;Cluster-17563.65995;Cluster-17563.68692;Cluster-17563.68693;Cluster-17563.94413;Cluster-17563.12301;Cluster-17563.89264;Cluster-17563.13740;Cluster-17563.17857;Cluster-17563.19995;Cluster-17563.30071;Cluster-17563.100023;Cluster-17563.31772;Cluster-10464.0;Cluster-17563.49271;Cluster-17563.53570;Cluster-17563.56399;Cluster-17563.60058;Cluster-17563.62729;Cl…	K07964+K07964+K07964+K07964+K07964+K07964+K07964+K10532+K12309+K12309+K12309+K12309+K12309+K12309+K12309+K12309+K12309+K12309+K12309+K12309+K12309+K12309+K12309+K12309+K12309+K12309+K12309+K12309+K12309+K12309+K12309+K12309+K12309+K12309+K12309+K12309+K12309+K12309+K12309+K12309+K12373
Glycerolipid metabolism	ko00561	119 out of 6135 1.93969030154849%	972 out of 69984 1.38888888888889%	0.000143588	0.019528	Cluster-17563.46650;Cluster-17563.47290;Cluster-17563.60836;Cluster-17563.66579;Cluster-17563.74567;Cluster-5679.0;Cluster-17563.16506;Cluster-17563.22194;Cluster-17563.28370;Cluster-17563.31888;Cluster-17563.33155;Cluster-17563.38278;Cluster-17563.101343;Cluster-17563.4632;Cluster-17563.50547;Cluster-17563.55397;Cluster-17563.67344;Cluster-17563.67669;Cluster-17563.75579;Cluster-17563.78498;Clus…	K00002+K00002+K00002+K00002+K00002+K00002+K00128+K00128+K00128+K00128+K00128+K00128+K00128+K00128+K00128+K00128+K00128+K00128+K00128+K00128+K00128+K00128+K00128+K00128+K00128+K00128+K00128+K00655+K00655+K00655+K00679+K00679+K00679+K00679+K00679+K00679+K00679+K00679+K00679+K00679+K00679+K00679+K00679+K00679+K00679+K00679+K00679+K00679+K00679+K00679+K00679+K00679+K00679+K00679+K00679+K00679+K00679+…
Inositol phosphate metabolism	ko00562	67 out of 6135 1.0920945395273%	799 out of 69984 1.14168952903521%	0.667144	1	Cluster-17563.75070;Cluster-26978.0;Cluster-17563.58075;Cluster-17563.59207;Cluster-17563.77605;Cluster-17563.79173;Cluster-27669.0;Cluster-43769.0;Cluster-43769.1;Cluster-17563.113210;Cluster-17563.97280;Cluster-17563.355;Cluster-17563.60895;Cluster-34857.0;Cluster-42054.0;Cluster-17563.11960;Cluster-17563.16965;Cluster-17563.54807;Cluster-17563.55289;Cluster-17563.60911;Cluster-17563.79777;Clus…	K00469+K00469+K00889+K00889+K00889+K00889+K00889+K00889+K00889+K00889+K00914+K00921+K00921+K00921+K00921+K00921+K01092+K01092+K01092+K01092+K01099+K01099+K01114+K01114+K01114+K01765+K01765+K01765+K01803+K01803+K01803+K01803+K01803+K01803+K01803+K01858+K01858+K01858+K01858+K03103+K05857+K05857+K05857+K10572+K10572+K18081+K18081+K18081+K18081+K18081+K18081+K18081+K18081+K18081+K18081+K19517+K20279+…
Glycosylphosphatidylinositol (GPI)-anchor biosynthesis	ko00563	20 out of 6135 0.32599837000815%	279 out of 69984 0.398662551440329%	0.854601	1	Cluster-17563.16043;Cluster-17563.17155;Cluster-17563.86298;Cluster-17563.65971;Cluster-17563.77315;Cluster-17563.85142;Cluster-17563.9713;Cluster-17563.99610;Cluster-17675.0;Cluster-17563.35599;Cluster-17563.3980;Cluster-17563.97071;Cluster-17563.16076;Cluster-17563.24891;Cluster-17563.130869;Cluster-17563.40161;Cluster-17563.79255;Cluster-17563.106609;Cluster-38485.0;Cluster-17563.22311	K03857+K03857+K03857+K03860+K03860+K03860+K03860+K03860+K03860+K05287+K05287+K05287+K05293+K05293+K05294+K05294+K05294+K05294+K05294+K07542
Glycerophospholipid metabolism	ko00564	84 out of 6135 1.36919315403423%	977 out of 69984 1.39603337905807%	0.591013	1	Cluster-17563.100098;Cluster-17563.43993;Cluster-17563.101726;Cluster-17563.48963;Cluster-17563.59664;Cluster-17563.69081;Cluster-17563.81048;Cluster-17563.82151;Cluster-17563.99665;Cluster-17563.50182;Cluster-17563.94021;Cluster-32131.1;Cluster-17563.109536;Cluster-17563.135348;Cluster-17563.80927;Cluster-18638.0;Cluster-37834.0;Cluster-17563.101094;Cluster-17563.69024;Cluster-17563.69367;Cluste…	K00006+K00006+K00006+K00006+K00006+K00006+K00006+K00006+K00006+K00655+K00655+K00655+K00894+K00901+K00901+K00901+K00901+K00967+K00967+K00967+K00967+K00967+K00968+K00968+K00968+K00981+K00993+K01094+K01094+K01094+K01094+K01094+K01114+K01114+K01114+K01115+K01115+K01115+K01115+K01115+K01115+K01126+K01126+K01126+K01126+K01126+K01126+K01126+K01126+K01613+K01613+K01613+K01613+K05929+K06123+K13506+K13506+…
Ether lipid metabolism	ko00565	18 out of 6135 0.293398533007335%	256 out of 69984 0.365797896662094%	0.864823	1	Cluster-10557.0;Cluster-17563.78465;Cluster-17563.82905;Cluster-17563.84363;Cluster-17563.38212;Cluster-17563.62769;Cluster-30848.0;Cluster-17563.411;Cluster-17563.50998;Cluster-17563.65900;Cluster-17563.90193;Cluster-17563.97240;Cluster-17563.11736;Cluster-17563.59948;Cluster-17563.49201;Cluster-17563.51981;Cluster-17563.70789;Cluster-17563.87103	K00993+K01062+K01062+K01062+K01114+K01114+K01114+K01115+K01115+K01115+K01115+K01115+K01115+K06123+K13519+K13519+K13519+K13519
Arachidonic acid metabolism	ko00590	23 out of 6135 0.374898125509372%	234 out of 69984 0.334362139917695%	0.313907	1	Cluster-17563.18510;Cluster-17563.39280;Cluster-17563.4281;Cluster-17563.54302;Cluster-17563.56213;Cluster-17563.69110;Cluster-17563.80381;Cluster-17563.83298;Cluster-17563.83299;Cluster-17563.40552;Cluster-17563.92760;Cluster-17563.94186;Cluster-43146.2;Cluster-17563.18161;Cluster-19369.0;Cluster-17563.100872;Cluster-17563.42167;Cluster-17563.72022;Cluster-17563.73304;Cluster-33636.0;Cluster-353…	K00432+K00432+K00432+K00432+K00432+K00432+K00432+K00432+K00432+K01832+K01832+K05309+K07418+K07425+K07425+K08726+K08726+K08726+K08726+K08726+K08726+K15730+K15730
Linoleic acid metabolism	ko00591	17 out of 6135 0.277098614506927%	193 out of 69984 0.275777320530407%	0.528657	1	Cluster-17563.134260;Cluster-17563.37999;Cluster-17563.39369;Cluster-17563.44755;Cluster-17563.62949;Cluster-17563.62950;Cluster-17563.76002;Cluster-17563.92742;Cluster-38570.0;Cluster-43146.2;Cluster-17563.100737;Cluster-17563.48940;Cluster-17563.52147;Cluster-17563.62273;Cluster-17563.106768;Cluster-17563.92393;Cluster-17563.127042	K00454+K00454+K00454+K00454+K00454+K00454+K00454+K00454+K00454+K07418+K15718+K15718+K15718+K15718+K15718+K15718+K15718
alpha-Linolenic acid metabolism	ko00592	48 out of 6135 0.78239608801956%	559 out of 69984 0.798754000914495%	0.581732	1	Cluster-17563.133198;Cluster-17563.59386;Cluster-17563.65976;Cluster-17563.68946;Cluster-17563.79126;Cluster-46197.0;Cluster-17563.521;Cluster-17563.56833;Cluster-17563.80887;Cluster-17563.98997;Cluster-18350.0;Cluster-17563.134260;Cluster-17563.37999;Cluster-17563.39369;Cluster-17563.44755;Cluster-17563.62949;Cluster-17563.62950;Cluster-17563.76002;Cluster-17563.92742;Cluster-38570.0;Cluster-175…	K00224+K00224+K00224+K00224+K00224+K00224+K00232+K00232+K00232+K00232+K00232+K00454+K00454+K00454+K00454+K00454+K00454+K00454+K00454+K00454+K01723+K01723+K01723+K01723+K05894+K05894+K05894+K05894+K05894+K07513+K07513+K08241+K08241+K08241+K10527+K10528+K10528+K10528+K16818+K18857+K18857+K18857+K18857+K18857+K18857+K18857+K18857+K18857
Sphingolipid metabolism	ko00600	75 out of 6135 1.22249388753056%	562 out of 69984 0.803040695016004%	0.000186634	0.0253822	Cluster-17563.131190;Cluster-17563.43271;Cluster-17563.43273;Cluster-17563.59345;Cluster-17563.89718;Cluster-17563.90296;Cluster-17563.57690;Cluster-17563.72858;Cluster-17563.80934;Cluster-17563.80935;Cluster-17563.55716;Cluster-17563.66767;Cluster-17563.125358;Cluster-17563.77512;Cluster-17563.77514;Cluster-17563.29057;Cluster-17563.55074;Cluster-17563.63730;Cluster-17563.82390;Cluster-17563.121…	K00654+K00654+K00654+K00654+K00654+K00654+K01190+K01190+K01190+K01190+K04708+K04708+K04708+K04711+K04711+K04713+K04713+K04713+K04713+K04713+K04718+K07407+K07407+K07407+K07407+K07407+K07407+K07407+K12309+K12309+K12309+K12309+K12309+K12309+K12309+K12309+K12309+K12309+K12309+K12309+K12309+K12309+K12309+K12309+K12309+K12309+K12309+K12309+K12309+K12309+K12309+K12309+K12309+K12309+K12309+K12309+K12309+…
Glycosphingolipid biosynthesis - globo and isoglobo series	ko00603	8 out of 6135 0.13039934800326%	88 out of 69984 0.125743026977595%	0.511292	1	Cluster-17563.52062;Cluster-17563.68293;Cluster-17563.70204;Cluster-17563.70616;Cluster-17563.76145;Cluster-17563.78824;Cluster-17563.107954;Cluster-17563.61193	K07407+K07407+K07407+K07407+K07407+K07407+K07407+K12373
Glycosphingolipid biosynthesis - ganglio series	ko00604	33 out of 6135 0.537897310513447%	239 out of 69984 0.341506630086877%	0.00628734	0.855078	Cluster-17563.13740;Cluster-17563.17857;Cluster-17563.19995;Cluster-17563.30071;Cluster-17563.100023;Cluster-17563.31772;Cluster-10464.0;Cluster-17563.49271;Cluster-17563.53570;Cluster-17563.56399;Cluster-17563.60058;Cluster-17563.62729;Cluster-17563.67350;Cluster-17563.70351;Cluster-17563.73068;Cluster-17563.73904;Cluster-17563.75374;Cluster-17563.75692;Cluster-17563.76839;Cluster-17563.81176;Cl…	K12309+K12309+K12309+K12309+K12309+K12309+K12309+K12309+K12309+K12309+K12309+K12309+K12309+K12309+K12309+K12309+K12309+K12309+K12309+K12309+K12309+K12309+K12309+K12309+K12309+K12309+K12309+K12309+K12309+K12309+K12309+K12309+K12373
Pyruvate metabolism	ko00620	150 out of 6135 2.44498777506112%	1210 out of 69984 1.72896662094193%	1.1424e-05	0.00155367	Cluster-19556.0;Cluster-17563.50281;Cluster-17563.50285;Cluster-17563.58443;Cluster-17563.61341;Cluster-17563.73132;Cluster-17563.99753;Cluster-17563.66043;Cluster-17563.66470;Cluster-17563.82462;Cluster-17563.88592;Cluster-17563.88595;Cluster-17563.91093;Cluster-17563.20842;Cluster-17563.54147;Cluster-17563.68936;Cluster-17563.76586;Cluster-17563.77791;Cluster-17563.77838;Cluster-17563.89795;Clu…	K00025+K00026+K00026+K00026+K00026+K00026+K00026+K00028+K00028+K00028+K00028+K00028+K00028+K00029+K00029+K00029+K00029+K00029+K00029+K00029+K00051+K00051+K00102+K00102+K00128+K00128+K00128+K00128+K00128+K00128+K00128+K00128+K00128+K00128+K00128+K00128+K00128+K00128+K00128+K00128+K00128+K00128+K00128+K00128+K00128+K00161+K00161+K00161+K00161+K00161+K00162+K00162+K00382+K00382+K00382+K00382+K00382+…
Glyoxylate and dicarboxylate metabolism	ko00630	125 out of 6135 2.03748981255094%	1079 out of 69984 1.54178097850937%	0.000891475	0.121241	Cluster-19556.0;Cluster-17563.50281;Cluster-17563.50285;Cluster-17563.58443;Cluster-17563.61341;Cluster-17563.73132;Cluster-17563.99753;Cluster-17563.60151;Cluster-17563.67280;Cluster-17563.71192;Cluster-17563.39872;Cluster-17563.49882;Cluster-17563.54126;Cluster-17563.72302;Cluster-17563.129260;Cluster-17563.66465;Cluster-41143.0;Cluster-17563.54891;Cluster-17563.68336;Cluster-17563.72964;Cluste…	K00025+K00026+K00026+K00026+K00026+K00026+K00026+K00122+K00122+K00122+K00281+K00281+K00281+K00281+K00281+K00284+K00284+K00382+K00382+K00382+K00382+K00382+K00382+K00382+K00600+K00600+K00600+K00600+K00600+K00600+K00600+K00600+K00600+K00600+K00600+K00600+K00600+K00600+K00600+K00600+K00600+K00600+K00605+K00605+K00605+K00605+K00626+K00626+K00830+K00830+K00830+K00830+K00830+K01433+K01455+K01455+K01455+…
Propanoate metabolism	ko00640	46 out of 6135 0.749796251018745%	562 out of 69984 0.803040695016004%	0.708876	1	Cluster-17563.521;Cluster-17563.56833;Cluster-17563.80887;Cluster-17563.98997;Cluster-18350.0;Cluster-17563.54891;Cluster-17563.68336;Cluster-17563.72964;Cluster-17563.7478;Cluster-17563.80850;Cluster-17563.84570;Cluster-17563.116766;Cluster-17563.68634;Cluster-17563.73796;Cluster-17563.73756;Cluster-17563.76697;Cluster-17563.86826;Cluster-17563.86827;Cluster-17563.73177;Cluster-17563.54075;Clust…	K00232+K00232+K00232+K00232+K00232+K00382+K00382+K00382+K00382+K00382+K00382+K00382+K00626+K00626+K01692+K01895+K01895+K01895+K01899+K01900+K01900+K01900+K01900+K01961+K01962+K01962+K01962+K02160+K02160+K02160+K02160+K05605+K05605+K05605+K05605+K05605+K05605+K05605+K05605+K05605+K05605+K05605+K05605+K05605+K05605+K05605
Butanoate metabolism	ko00650	40 out of 6135 0.6519967400163%	306 out of 69984 0.437242798353909%	0.00732874	0.996708	Cluster-17563.49773;Cluster-17563.81741;Cluster-17563.96566;Cluster-17563.100607;Cluster-17563.55232;Cluster-17563.67872;Cluster-17563.84035;Cluster-17563.92486;Cluster-17563.92488;Cluster-17563.99660;Cluster-17563.68634;Cluster-17563.73796;Cluster-17563.70300;Cluster-17563.28041;Cluster-17563.45582;Cluster-17563.104530;Cluster-17563.78624;Cluster-17563.70439;Cluster-17563.71218;Cluster-17563.716…	K00074+K00074+K00074+K00109+K00109+K00109+K00109+K00109+K00109+K00109+K00626+K00626+K01580+K01640+K01640+K01640+K01640+K01641+K01641+K01641+K01641+K01641+K01652+K01652+K01652+K01653+K01653+K01692+K01913+K01913+K01913+K01913+K01913+K01913+K01913+K01913+K01913+K16871+K17761+K18121
C5-Branched dibasic acid metabolism	ko00660	6 out of 6135 0.097799511002445%	55 out of 69984 0.0785893918609968%	0.351133	1	Cluster-17563.49240;Cluster-17563.70531;Cluster-17563.90390;Cluster-17563.36515;Cluster-17563.49465;Cluster-17563.74356	K01652+K01652+K01652+K01653+K01653+K01703
One carbon pool by folate	ko00670	39 out of 6135 0.635696821515892%	247 out of 69984 0.352937814357567%	0.000245177	0.0333441	Cluster-17563.61729;Cluster-17563.85223;Cluster-17563.113209;Cluster-17563.19121;Cluster-17563.61510;Cluster-17563.61519;Cluster-39277.0;Cluster-17563.32996;Cluster-17563.33830;Cluster-17563.45349;Cluster-17563.60698;Cluster-17563.64935;Cluster-17563.68099;Cluster-17563.70057;Cluster-17563.105345;Cluster-17563.73869;Cluster-17563.88614;Cluster-17563.96285;Cluster-17563.96920;Cluster-17563.97622;C…	K00288+K00288+K00288+K00297+K00297+K00297+K00297+K00600+K00600+K00600+K00600+K00600+K00600+K00600+K00600+K00600+K00600+K00600+K00600+K00600+K00600+K00600+K00600+K00600+K00600+K00602+K00605+K00605+K00605+K00605+K01433+K01934+K01934+K01938+K13998+K13998+K13998+K13998+K13998
Carbon fixation in photosynthetic organisms	ko00710	99 out of 6135 1.61369193154034%	844 out of 69984 1.20598994055784%	0.00194432	0.264427	Cluster-19556.0;Cluster-17563.50281;Cluster-17563.50285;Cluster-17563.58443;Cluster-17563.61341;Cluster-17563.73132;Cluster-17563.99753;Cluster-17563.66043;Cluster-17563.66470;Cluster-17563.82462;Cluster-17563.88592;Cluster-17563.88595;Cluster-17563.91093;Cluster-17563.20842;Cluster-17563.54147;Cluster-17563.68936;Cluster-17563.76586;Cluster-17563.77791;Cluster-17563.77838;Cluster-17563.89795;Clu…	K00025+K00026+K00026+K00026+K00026+K00026+K00026+K00028+K00028+K00028+K00028+K00028+K00028+K00029+K00029+K00029+K00029+K00029+K00029+K00029+K00051+K00051+K00134+K00134+K00134+K00855+K00855+K00855+K00927+K00927+K00927+K00927+K00927+K01006+K01006+K01006+K01006+K01006+K01006+K01006+K01006+K01006+K01100+K01100+K01595+K01595+K01595+K01595+K01595+K01595+K01595+K01595+K01595+K01595+K01595+K01595+K01602+…
Thiamine metabolism	ko00730	28 out of 6135 0.45639771801141%	255 out of 69984 0.364368998628258%	0.128253	1	Cluster-17563.58164;Cluster-17563.85560;Cluster-17563.108475;Cluster-17563.48879;Cluster-17563.8303;Cluster-17563.8304;Cluster-17563.110192;Cluster-17563.63520;Cluster-17563.68961;Cluster-17563.74579;Cluster-17563.74585;Cluster-17563.74988;Cluster-17563.75831;Cluster-17563.85859;Cluster-17563.33409;Cluster-17563.45748;Cluster-17563.85852;Cluster-17563.18636;Cluster-17563.38146;Cluster-17563.76669…	K00939+K00939+K00939+K00949+K00949+K00949+K00949+K01662+K01662+K01662+K01662+K01662+K01662+K01662+K03146+K03146+K03147+K04487+K04487+K04487+K04487+K06928+K06928+K06949+K14153+K20896+K20896+K20896
Riboflavin metabolism	ko00740	24 out of 6135 0.39119804400978%	225 out of 69984 0.321502057613169%	0.184313	1	Cluster-17563.56448;Cluster-17563.12112;Cluster-17563.50853;Cluster-42703.0;Cluster-17563.111331;Cluster-17563.131438;Cluster-17563.419;Cluster-17563.42412;Cluster-17563.8797;Cluster-17563.124956;Cluster-17563.59858;Cluster-17563.76402;Cluster-17563.9535;Cluster-17563.47944;Cluster-17563.58070;Cluster-17563.67903;Cluster-17563.70087;Cluster-17563.72902;Cluster-17563.82138;Cluster-17563.88573;Clus…	K00793+K00793+K01513+K01513+K01513+K11752+K11752+K11752+K11752+K11752+K14379+K14652+K14652+K20884+K20884+K20884+K20884+K20884+K20884+K20884+K20884+K20884+K20884+K20884
Vitamin B6 metabolism	ko00750	20 out of 6135 0.32599837000815%	129 out of 69984 0.184327846364883%	0.00877158	1	Cluster-17563.24874;Cluster-17563.42228;Cluster-17563.51971;Cluster-17563.51973;Cluster-17563.51974;Cluster-17563.99327;Cluster-17563.47710;Cluster-17563.77225;Cluster-17563.123783;Cluster-17563.43658;Cluster-17563.102564;Cluster-17563.55959;Cluster-17563.30286;Cluster-17563.58935;Cluster-17563.69596;Cluster-17563.74444;Cluster-17563.69140;Cluster-17563.79581;Cluster-40922.0;Cluster-17563.112525	K00275+K00275+K00275+K00275+K00275+K00275+K00831+K00868+K00868+K05275+K05275+K05275+K06215+K06215+K06215+K08681+K13248+K13248+K13248+K13248
Nicotinate and nicotinamide metabolism	ko00760	16 out of 6135 0.26079869600652%	302 out of 69984 0.431527206218564%	0.991312	1	Cluster-17563.116508;Cluster-17563.116510;Cluster-17563.73369;Cluster-17563.124238;Cluster-17563.7356;Cluster-17563.122569;Cluster-17563.127562;Cluster-17563.25658;Cluster-17563.94085;Cluster-19721.0;Cluster-17563.50853;Cluster-42703.0;Cluster-17563.111331;Cluster-17563.59870;Cluster-17563.8323;Cluster-17563.27593	K00278+K00278+K00858+K00858+K01081+K01081+K01081+K01240+K01240+K01240+K01513+K01513+K01513+K03426+K03517+K06210
Pantothenate and CoA biosynthesis	ko00770	44 out of 6135 0.71719641401793%	464 out of 69984 0.663008687700046%	0.314695	1	Cluster-17563.16506;Cluster-17563.22194;Cluster-17563.28370;Cluster-17563.31888;Cluster-17563.33155;Cluster-17563.38278;Cluster-17563.101343;Cluster-17563.4632;Cluster-17563.50547;Cluster-17563.55397;Cluster-17563.67344;Cluster-17563.67669;Cluster-17563.75579;Cluster-17563.78498;Cluster-17563.7969;Cluster-17563.82962;Cluster-17563.84271;Cluster-17563.84559;Cluster-17563.9196;Cluster-28121.0;Clust…	K00128+K00128+K00128+K00128+K00128+K00128+K00128+K00128+K00128+K00128+K00128+K00128+K00128+K00128+K00128+K00128+K00128+K00128+K00128+K00128+K00128+K00207+K00606+K00826+K00826+K00826+K00826+K00859+K00859+K01513+K01513+K01513+K01652+K01652+K01652+K01653+K01653+K01687+K01687+K01918+K01918+K09680+K17839+K17839
Biotin metabolism	ko00780	20 out of 6135 0.32599837000815%	206 out of 69984 0.294352994970279%	0.35015	1	Cluster-17563.1906;Cluster-17563.43102;Cluster-17563.54097;Cluster-17563.65305;Cluster-17563.73023;Cluster-17563.86703;Cluster-17563.94871;Cluster-17563.36624;Cluster-17563.42261;Cluster-17563.42263;Cluster-17563.66323;Cluster-17563.58161;Cluster-48723.0;Cluster-17563.56102;Cluster-17563.26172;Cluster-17563.36498;Cluster-17563.67427;Cluster-17563.67428;Cluster-17563.76710;Cluster-28577.0	K00059+K00059+K00059+K00059+K00059+K00059+K00059+K00208+K00208+K00208+K00208+K00652+K00652+K01942+K02169+K02372+K09458+K09458+K09458+K09458
Lipoic acid metabolism	ko00785	5 out of 6135 0.0814995925020375%	33 out of 69984 0.0471536351165981%	0.158521	1	Cluster-17563.35157;Cluster-17563.70985;Cluster-17563.81843;Cluster-42317.0;Cluster-47589.0	K03644+K03644+K03644+K03644+K03644
Folate biosynthesis	ko00790	19 out of 6135 0.309698451507742%	275 out of 69984 0.392946959304984%	0.887575	1	Cluster-17563.56836;Cluster-17563.64250;Cluster-17563.64251;Cluster-17563.93055;Cluster-17563.112699;Cluster-17563.16159;Cluster-17563.2149;Cluster-17563.2150;Cluster-17563.6516;Cluster-34224.0;Cluster-17563.76402;Cluster-17563.9535;Cluster-17563.58585;Cluster-17563.3740;Cluster-17563.83225;Cluster-17563.89523;Cluster-17563.120620;Cluster-17563.71673;Cluster-3276.0	K01495+K01724+K01724+K01930+K01930+K13998+K13998+K13998+K13998+K13998+K14652+K14652+K15376+K15631+K15631+K15631+K15631+K18482+K18482
Porphyrin and chlorophyll metabolism	ko00860	55 out of 6135 0.896495517522412%	435 out of 69984 0.621570644718793%	0.00399103	0.54278	Cluster-17563.57801;Cluster-17563.57802;Cluster-17563.57803;Cluster-17563.72173;Cluster-17563.112308;Cluster-17563.44427;Cluster-17563.28451;Cluster-17563.30457;Cluster-17563.37884;Cluster-17563.13892;Cluster-17563.59436;Cluster-17563.114;Cluster-17563.18198;Cluster-17563.85856;Cluster-17563.122030;Cluster-17563.126508;Cluster-17563.5944;Cluster-17563.99832;Cluster-28313.0;Cluster-17563.129035;Cl…	K00218+K00218+K00218+K00218+K00218+K00228+K00231+K01599+K01599+K01698+K01719+K01719+K01749+K01749+K01749+K01749+K01772+K01772+K01772+K01772+K01845+K02257+K02259+K02492+K02492+K02492+K03403+K03403+K03405+K03428+K04035+K04040+K04040+K04040+K04040+K08099+K08101+K08101+K13071+K13071+K13071+K13071+K13071+K13071+K13544+K13544+K13600+K13606+K13606+K13606+K18010+K19073+K19073+K21480+K21480
Terpenoid backbone biosynthesis	ko00900	52 out of 6135 0.84759576202119%	478 out of 69984 0.683013260173754%	0.0630186	1	Cluster-17563.101646;Cluster-17563.77601;Cluster-17563.78274;Cluster-17563.96494;Cluster-17563.98795;Cluster-17563.118745;Cluster-17563.92344;Cluster-17563.82451;Cluster-17563.68634;Cluster-17563.73796;Cluster-17563.55110;Cluster-17563.82800;Cluster-17563.96763;Cluster-45144.0;Cluster-17563.52290;Cluster-17563.125056;Cluster-17563.83013;Cluster-17563.87171;Cluster-17563.108315;Cluster-17563.12731…	K00021+K00021+K00021+K00021+K00021+K00021+K00099+K00587+K00626+K00626+K00787+K00869+K00869+K00869+K00919+K00919+K00938+K00991+K00991+K00991+K01597+K01597+K01597+K01641+K01641+K01641+K01641+K01641+K01662+K01662+K01662+K01662+K01662+K01662+K01662+K01823+K01823+K03526+K03527+K05356+K05906+K05906+K08658+K08658+K11778+K13789+K13789+K13789+K13789+K13789+K14066+K15891
Indole alkaloid biosynthesis	ko00901	7 out of 6135 0.114099429502852%	73 out of 69984 0.10430955647005%	0.460468	1	Cluster-17563.71473;Cluster-17563.78707;Cluster-17563.81675;Cluster-17563.9034;Cluster-39145.0;Cluster-17563.14767;Cluster-17563.6604	K01593+K01593+K01593+K01593+K01593+K01757+K01757
Monoterpenoid biosynthesis	ko00902	26 out of 6135 0.423797881010595%	170 out of 69984 0.242912665752172%	0.0037774	0.513727	Cluster-17563.25450;Cluster-17563.26538;Cluster-17563.31584;Cluster-17563.37039;Cluster-17563.56809;Cluster-17563.61090;Cluster-17563.61091;Cluster-17563.61092;Cluster-17563.66857;Cluster-17563.115318;Cluster-17563.132108;Cluster-17563.29481;Cluster-17563.57957;Cluster-17563.60479;Cluster-17563.81163;Cluster-17563.81865;Cluster-17563.83595;Cluster-17563.87789;Cluster-17563.92707;Cluster-17563.109…	K15095+K15095+K15095+K15095+K15095+K15095+K15095+K15095+K15095+K15095+K21374+K21374+K21374+K21374+K21374+K21374+K21374+K21374+K21374+K21374+K21374+K23810+K23810+K23810+K23810+K23810
Limonene and pinene degradation	ko00903	22 out of 6135 0.358598207008965%	157 out of 69984 0.2243369913123%	0.0191933	1	Cluster-17563.16506;Cluster-17563.22194;Cluster-17563.28370;Cluster-17563.31888;Cluster-17563.33155;Cluster-17563.38278;Cluster-17563.101343;Cluster-17563.4632;Cluster-17563.50547;Cluster-17563.55397;Cluster-17563.67344;Cluster-17563.67669;Cluster-17563.75579;Cluster-17563.78498;Cluster-17563.7969;Cluster-17563.82962;Cluster-17563.84271;Cluster-17563.84559;Cluster-17563.9196;Cluster-28121.0;Clust…	K00128+K00128+K00128+K00128+K00128+K00128+K00128+K00128+K00128+K00128+K00128+K00128+K00128+K00128+K00128+K00128+K00128+K00128+K00128+K00128+K00128+K01692
Diterpenoid biosynthesis	ko00904	26 out of 6135 0.423797881010595%	134 out of 69984 0.191472336534065%	9.50678e-05	0.0129292	Cluster-49091.0;Cluster-17563.119241;Cluster-17563.119242;Cluster-13999.0;Cluster-17563.131037;Cluster-17563.26339;Cluster-17563.38769;Cluster-17563.101064;Cluster-17563.44474;Cluster-17563.63308;Cluster-17563.111390;Cluster-47225.0;Cluster-9130.0;Cluster-17563.124767;Cluster-17563.38619;Cluster-17563.63852;Cluster-17563.70903;Cluster-17563.74110;Cluster-17563.93127;Cluster-18208.0;Cluster-17563.…	K04121+K04121+K04121+K04123+K04125+K04125+K04125+K04125+K04125+K04125+K04125+K04125+K04125+K04125+K17961+K17961+K17961+K17961+K17961+K17961+K17961+K17961+K17961+K17961+K17961+K17961
Brassinosteroid biosynthesis	ko00905	31 out of 6135 0.505297473512632%	167 out of 69984 0.238625971650663%	5.22394e-05	0.00710456	Cluster-17563.83422;Cluster-17563.71976;Cluster-17563.77731;Cluster-17563.89422;Cluster-17563.90242;Cluster-17563.69564;Cluster-17563.93611;Cluster-17563.43460;Cluster-17563.37737;Cluster-17563.60472;Cluster-17563.60519;Cluster-17563.73347;Cluster-17563.135220;Cluster-17563.20558;Cluster-17563.2404;Cluster-17563.25050;Cluster-17563.33241;Cluster-17563.34887;Cluster-17563.41818;Cluster-17563.45354…	K09587+K09588+K09588+K09588+K09588+K09590+K09590+K09591+K12637+K12637+K12637+K12637+K15639+K15639+K15639+K15639+K15639+K15639+K15639+K15639+K15639+K15639+K15639+K15639+K15639+K15639+K15639+K15639+K15639+K15639+K15639
Carotenoid biosynthesis	ko00906	54 out of 6135 0.880195599022005%	315 out of 69984 0.450102880658436%	1.56383e-06	0.00021268	Cluster-17563.58250;Cluster-17563.6162;Cluster-17563.71832;Cluster-17563.80484;Cluster-17563.89307;Cluster-17563.94894;Cluster-17563.74762;Cluster-20002.0;Cluster-17563.130535;Cluster-17563.75061;Cluster-17563.89783;Cluster-17563.102250;Cluster-17563.132344;Cluster-17563.36428;Cluster-17563.39400;Cluster-17563.43131;Cluster-17563.60971;Cluster-17563.71341;Cluster-17563.81222;Cluster-17563.115456;…	K00514+K00514+K00514+K00514+K00514+K00514+K02291+K02291+K02293+K02293+K06444+K09835+K09838+K09838+K09838+K09838+K09838+K09838+K09838+K09838+K09838+K09838+K09839+K09839+K09839+K09840+K09840+K09840+K09840+K09841+K09841+K09841+K09841+K09842+K09842+K09842+K09842+K09843+K09843+K09843+K09843+K09843+K15744+K15746+K15746+K15746+K15746+K15746+K15747+K15747+K15747+K17911+K17911+K17911
Zeatin biosynthesis	ko00908	24 out of 6135 0.39119804400978%	138 out of 69984 0.19718792866941%	0.000915327	0.124485	Cluster-47938.0;Cluster-19885.0;Cluster-17563.130904;Cluster-17563.132420;Cluster-17563.35871;Cluster-17563.35872;Cluster-17563.38181;Cluster-17563.5300;Cluster-17563.60048;Cluster-17563.105315;Cluster-17563.77205;Cluster-17563.95620;Cluster-17563.111212;Cluster-17563.124974;Cluster-17563.129835;Cluster-17563.33336;Cluster-17563.53332;Cluster-17563.62480;Cluster-17563.64538;Cluster-17563.107469;C…	K00279+K10760+K13493+K13493+K13493+K13493+K13493+K13493+K13493+K13493+K13493+K13493+K13493+K13493+K13493+K13496+K13496+K13496+K13496+K13496+K13496+K13496+K13496+K13496
Sesquiterpenoid and triterpenoid biosynthesis	ko00909	39 out of 6135 0.635696821515892%	227 out of 69984 0.324359853680841%	3.87378e-05	0.00526833	Cluster-17563.130801;Cluster-17563.22086;Cluster-17563.31800;Cluster-17563.46921;Cluster-17563.77084;Cluster-17563.86722;Cluster-17563.96132;Cluster-17563.128013;Cluster-17563.60994;Cluster-17563.71916;Cluster-17563.69440;Cluster-17563.70234;Cluster-17563.49508;Cluster-17563.80874;Cluster-17563.858;Cluster-17563.861;Cluster-17563.862;Cluster-23719.0;Cluster-17563.40786;Cluster-17563.77796;Cluster…	K00511+K00511+K00511+K00511+K00511+K00511+K00511+K00511+K00801+K00801+K14173+K14173+K14175+K14175+K14175+K14175+K14175+K14175+K15803+K15803+K15803+K15803+K15803+K15803+K15803+K15803+K15813+K15813+K15813+K15813+K15813+K15813+K15813+K15813+K15813+K15813+K15813+K15813+K15891
Nitrogen metabolism	ko00910	29 out of 6135 0.472697636511817%	381 out of 69984 0.544410150891632%	0.812005	1	Cluster-17563.94509;Cluster-25887.0;Cluster-17563.114720;Cluster-17563.66465;Cluster-41143.0;Cluster-17563.66576;Cluster-17563.65737;Cluster-17563.33118;Cluster-17563.47326;Cluster-17563.86529;Cluster-17563.91419;Cluster-17563.91936;Cluster-17563.2993;Cluster-17563.55424;Cluster-17563.88626;Cluster-30154.0;Cluster-30592.0;Cluster-17563.48973;Cluster-17563.45400;Cluster-17563.78336;Cluster-17563.8…	K00261+K00261+K00261+K00284+K00284+K00366+K00459+K01455+K01455+K01455+K01455+K01455+K01673+K01673+K01673+K01673+K01673+K01915+K02575+K02575+K02575+K02575+K02575+K02575+K02575+K10534+K10534+K10534+K10534
Sulfur metabolism	ko00920	37 out of 6135 0.603096984515077%	341 out of 69984 0.48725422953818%	0.104757	1	Cluster-17563.45139;Cluster-17563.45140;Cluster-17563.4992;Cluster-17563.55004;Cluster-17563.82660;Cluster-17563.91762;Cluster-19619.0;Cluster-17563.120851;Cluster-17563.121242;Cluster-17563.121889;Cluster-17563.125136;Cluster-17563.74319;Cluster-17563.26294;Cluster-17563.39600;Cluster-17563.42751;Cluster-17563.105726;Cluster-17563.89009;Cluster-17563.92814;Cluster-17563.94724;Cluster-17563.10891…	K00640+K00640+K00640+K00640+K00640+K00640+K00640+K00640+K00640+K00640+K00640+K00641+K00860+K00860+K00860+K00860+K00860+K00860+K00860+K00860+K01082+K01082+K01738+K01738+K01738+K01738+K01738+K01738+K01738+K01738+K01738+K01739+K05907+K05907+K05907+K05907+K17725
Stilbenoid, diarylheptanoid and gingerol biosynthesis	ko00945	40 out of 6135 0.6519967400163%	157 out of 69984 0.2243369913123%	5.26318e-10	7.15793e-08	Cluster-17563.18361;Cluster-17563.65873;Cluster-17563.65875;Cluster-17563.68423;Cluster-17563.80171;Cluster-17563.80348;Cluster-17563.82419;Cluster-17563.61541;Cluster-17563.80969;Cluster-17563.102290;Cluster-17563.58304;Cluster-17563.64495;Cluster-17563.72051;Cluster-17563.74713;Cluster-17563.76642;Cluster-17563.83611;Cluster-17563.28833;Cluster-17563.45773;Cluster-17563.55710;Cluster-17563.6247…	K00487+K00487+K00487+K00487+K00487+K00487+K00487+K00588+K00588+K09754+K09754+K09754+K09754+K09754+K09754+K09754+K13065+K13065+K13065+K13065+K13065+K13065+K13065+K13065+K13065+K13065+K13065+K13065+K13065+K13065+K13065+K13065+K13065+K13065+K13065+K13065+K13065+K13065+K13065+K13065
Isoquinoline alkaloid biosynthesis	ko00950	31 out of 6135 0.505297473512632%	263 out of 69984 0.375800182898948%	0.0564874	1	Cluster-17563.30644;Cluster-17563.55308;Cluster-17563.65490;Cluster-17563.88054;Cluster-38111.0;Cluster-17563.128145;Cluster-17563.33739;Cluster-17563.104124;Cluster-17563.67979;Cluster-17563.97757;Cluster-17563.1955;Cluster-3393.0;Cluster-17563.71473;Cluster-17563.78707;Cluster-17563.81675;Cluster-17563.9034;Cluster-39145.0;Cluster-30551.0;Cluster-35029.0;Cluster-1575.0;Cluster-17563.42565;Clust…	K00276+K00276+K00276+K00276+K00276+K00276+K00422+K00422+K00422+K00422+K00815+K00815+K01593+K01593+K01593+K01593+K01593+K13390+K13390+K14454+K14975+K14975+K14975+K14975+K14975+K14975+K14976+K14976+K14976+K21580+K22097
Tropane, piperidine and pyridine alkaloid biosynthesis	ko00960	21 out of 6135 0.342298288508557%	202 out of 69984 0.288637402834934%	0.237791	1	Cluster-17563.30644;Cluster-17563.55308;Cluster-17563.65490;Cluster-17563.88054;Cluster-38111.0;Cluster-17563.128145;Cluster-17563.1955;Cluster-3393.0;Cluster-17563.19157;Cluster-17563.100599;Cluster-17563.100601;Cluster-17563.53114;Cluster-17563.53541;Cluster-17563.70973;Cluster-17563.79745;Cluster-17563.87432;Cluster-17563.98337;Cluster-17563.98338;Cluster-31134.0;Cluster-17563.124533;Cluster-1…	K00276+K00276+K00276+K00276+K00276+K00276+K00815+K00815+K08081+K08081+K08081+K08081+K08081+K08081+K08081+K08081+K08081+K08081+K08081+K08081+K14454
Glucosinolate biosynthesis	ko00966	12 out of 6135 0.19559902200489%	67 out of 69984 0.0957361682670325%	0.0129192	1	Cluster-17563.37744;Cluster-17563.46154;Cluster-17563.86932;Cluster-48198.0;Cluster-17563.74356;Cluster-17563.130996;Cluster-17563.14196;Cluster-15580.0;Cluster-17563.57328;Cluster-17563.6715;Cluster-29529.0;Cluster-17563.67467	K00826+K00826+K00826+K00826+K01703+K11820+K11820+K11820+K11820+K11820+K11820+K12153
Aminoacyl-tRNA biosynthesis	ko00970	50 out of 6135 0.814995925020375%	643 out of 69984 0.918781435756744%	0.831741	1	Cluster-17563.72072;Cluster-17563.72073;Cluster-17563.93063;Cluster-17563.94352;Cluster-17563.134139;Cluster-17563.67402;Cluster-17563.20711;Cluster-17563.51427;Cluster-29440.1;Cluster-3634.0;Cluster-17563.54552;Cluster-17563.66529;Cluster-17563.129078;Cluster-17563.75595;Cluster-39013.1;Cluster-17563.40851;Cluster-17563.108972;Cluster-17563.18759;Cluster-17563.24414;Cluster-17563.100990;Cluster-…	K01866+K01866+K01866+K01866+K01867+K01869+K01870+K01870+K01870+K01870+K01872+K01872+K01872+K01873+K01873+K01874+K01874+K01875+K01875+K01875+K01876+K01880+K01880+K01880+K01881+K01881+K01881+K01881+K01881+K01881+K01883+K01886+K01886+K01889+K01889+K01890+K01890+K01890+K01890+K01893+K01893+K02433+K02433+K02433+K02433+K02433+K02435+K04567+K04567+K14164
Biosynthesis of various secondary metabolites - part 2	ko00998	3 out of 6135 0.0488997555012225%	8 out of 69984 0.0114311842706904%	0.0269328	1	Cluster-17563.40275;Cluster-17563.47117;Cluster-17563.53172	K21568+K21568+K21568
V	ko01040	35 out of 6135 0.570497147514262%	448 out of 69984 0.640146319158665%	0.785786	1	Cluster-17563.521;Cluster-17563.56833;Cluster-17563.80887;Cluster-17563.98997;Cluster-18350.0;Cluster-17563.38344;Cluster-17563.104237;Cluster-17563.69245;Cluster-17563.69605;Cluster-17563.69606;Cluster-17563.78979;Cluster-17563.128168;Cluster-17563.75819;Cluster-17563.88984;Cluster-17563.21023;Cluster-17563.66207;Cluster-17563.66208;Cluster-17563.73857;Cluster-17563.107033;Cluster-17563.94404;Cl…	K00232+K00232+K00232+K00232+K00232+K01068+K03921+K03921+K03921+K03921+K03921+K03921+K07513+K07513+K10249+K10251+K10251+K10251+K10251+K10251+K10251+K10251+K10251+K10256+K10256+K10258+K10258+K10258+K10258+K10258+K10258+K10703+K10703+K10703+K10703
Metabolic pathways	ko01100	2684 out of 6135 43.7489812550937%	24703 out of 69984 35.2980681298583%	4.40958e-11	5.99703e-09	Cluster-6152.0;Cluster-17563.46650;Cluster-17563.47290;Cluster-17563.60836;Cluster-17563.66579;Cluster-17563.74567;Cluster-5679.0;Cluster-17563.104365;Cluster-17563.45017;Cluster-17563.53901;Cluster-17563.65092;Cluster-17563.65095;Cluster-17563.65096;Cluster-17563.70125;Cluster-17563.80983;Cluster-17563.93965;Cluster-17563.71954;Cluster-17563.71987;Cluster-16024.0;Cluster-25739.0;Cluster-16942.0;…	K00001+K00002+K00002+K00002+K00002+K00002+K00002+K00003+K00008+K00008+K00008+K00008+K00008+K00008+K00008+K00008+K00012+K00012+K00013+K00013+K00020+K00020+K00020+K00020+K00020+K00020+K00020+K00020+K00020+K00020+K00020+K00020+K00020+K00021+K00021+K00021+K00021+K00021+K00021+K00025+K00026+K00026+K00026+K00026+K00026+K00026+K00028+K00028+K00028+K00028+K00028+K00028+K00029+K00029+K00029+K00029+K00029+…
Carbon metabolism	ko01200	359 out of 6135 5.85167074164629%	3369 out of 69984 4.81395747599451%	6.12936e-05	0.00833593	Cluster-19556.0;Cluster-17563.50281;Cluster-17563.50285;Cluster-17563.58443;Cluster-17563.61341;Cluster-17563.73132;Cluster-17563.99753;Cluster-17563.66043;Cluster-17563.66470;Cluster-17563.82462;Cluster-17563.88592;Cluster-17563.88595;Cluster-17563.91093;Cluster-17563.20842;Cluster-17563.54147;Cluster-17563.68936;Cluster-17563.76586;Cluster-17563.77791;Cluster-17563.77838;Cluster-17563.89795;Clu…	K00025+K00026+K00026+K00026+K00026+K00026+K00026+K00028+K00028+K00028+K00028+K00028+K00028+K00029+K00029+K00029+K00029+K00029+K00029+K00029+K00030+K00031+K00031+K00033+K00036+K00036+K00036+K00036+K00036+K00036+K00036+K00036+K00036+K00051+K00051+K00058+K00058+K00058+K00074+K00074+K00074+K00121+K00121+K00121+K00121+K00121+K00121+K00122+K00122+K00122+K00131+K00131+K00131+K00134+K00134+K00134+K00161+…
2-Oxocarboxylic acid metabolism	ko01210	46 out of 6135 0.749796251018745%	604 out of 69984 0.863054412437128%	0.859982	1	Cluster-17563.62560;Cluster-17563.65979;Cluster-17563.104838;Cluster-17563.88575;Cluster-17563.97792;Cluster-17563.100348;Cluster-17563.37744;Cluster-17563.46154;Cluster-17563.86932;Cluster-48198.0;Cluster-17563.50015;Cluster-17563.100527;Cluster-17563.54263;Cluster-17563.55864;Cluster-17563.15348;Cluster-17563.40590;Cluster-17563.53824;Cluster-17563.111440;Cluster-13620.0;Cluster-17563.49240;Clu…	K00030+K00031+K00031+K00620+K00620+K00818+K00826+K00826+K00826+K00826+K01438+K01647+K01647+K01647+K01649+K01649+K01649+K01649+K01649+K01652+K01652+K01652+K01653+K01653+K01681+K01681+K01687+K01687+K01703+K11820+K11820+K11820+K11820+K11820+K11820+K12153+K14272+K14272+K14272+K14272+K14272+K14272+K14454+K14677+K14682+K14682
Fatty acid metabolism	ko01212	95 out of 6135 1.54849225753871%	1015 out of 69984 1.45033150434385%	0.265458	1	Cluster-17563.1906;Cluster-17563.43102;Cluster-17563.54097;Cluster-17563.65305;Cluster-17563.73023;Cluster-17563.86703;Cluster-17563.94871;Cluster-17563.36624;Cluster-17563.42261;Cluster-17563.42263;Cluster-17563.66323;Cluster-17563.521;Cluster-17563.56833;Cluster-17563.80887;Cluster-17563.98997;Cluster-18350.0;Cluster-17563.68634;Cluster-17563.73796;Cluster-17563.63768;Cluster-17563.73756;Cluste…	K00059+K00059+K00059+K00059+K00059+K00059+K00059+K00208+K00208+K00208+K00208+K00232+K00232+K00232+K00232+K00232+K00626+K00626+K00648+K01692+K01897+K01897+K01897+K01897+K01897+K01897+K01897+K01897+K01897+K01897+K01897+K01897+K01897+K01897+K01897+K01897+K01897+K01897+K01897+K01897+K01897+K01897+K01897+K01897+K01897+K01897+K01961+K01962+K01962+K01962+K02160+K02160+K02160+K02160+K02372+K03921+K03921+…
Biosynthesis of amino acids	ko01230	250 out of 6135 4.07497962510187%	2505 out of 69984 3.57938957475995%	0.0169878	1	Cluster-17563.104365;Cluster-16024.0;Cluster-25739.0;Cluster-17563.62560;Cluster-17563.65979;Cluster-17563.104838;Cluster-17563.71238;Cluster-17563.71526;Cluster-17563.77761;Cluster-17563.40209;Cluster-17563.65975;Cluster-17563.66377;Cluster-17563.32996;Cluster-17563.33830;Cluster-17563.45349;Cluster-17563.60698;Cluster-17563.64935;Cluster-17563.68099;Cluster-17563.70057;Cluster-17563.105345;Clus…	K00003+K00013+K00013+K00030+K00031+K00031+K00058+K00058+K00058+K00134+K00134+K00134+K00600+K00600+K00600+K00600+K00600+K00600+K00600+K00600+K00600+K00600+K00600+K00600+K00600+K00600+K00600+K00600+K00600+K00600+K00616+K00616+K00616+K00620+K00620+K00640+K00640+K00640+K00640+K00640+K00640+K00640+K00640+K00640+K00640+K00640+K00641+K00765+K00765+K00765+K00789+K00789+K00789+K00789+K00789+K00789+K00789+…
Ribosome biogenesis in eukaryotes	ko03008	110 out of 6135 1.79299103504482%	1149 out of 69984 1.64180384087791%	0.177407	1	Cluster-17563.7456;Cluster-17563.98871;Cluster-17563.98880;Cluster-17563.14869;Cluster-17563.62860;Cluster-17563.69974;Cluster-17563.95505;Cluster-17563.112019;Cluster-17563.122098;Cluster-17563.45168;Cluster-17563.86234;Cluster-17563.26633;Cluster-17563.75076;Cluster-17563.80762;Cluster-17563.81142;Cluster-17563.99208;Cluster-24617.0;Cluster-25614.0;Cluster-17563.110744;Cluster-5453.0;Cluster-17…	K01164+K01164+K01164+K03097+K03097+K03097+K03097+K03097+K03097+K03538+K03538+K06943+K06943+K06943+K06943+K06943+K06943+K06943+K06943+K06943+K06943+K07178+K07178+K07178+K07562+K07936+K07936+K07936+K11108+K11130+K11130+K11131+K11883+K11883+K11883+K12619+K12619+K13288+K14536+K14536+K14536+K14536+K14537+K14537+K14537+K14538+K14538+K14538+K14538+K14538+K14538+K14544+K14544+K14546+K14548+K14548+K14548+…
Ribosome	ko03010	191 out of 6135 3.11328443357783%	3273 out of 69984 4.67678326474623%	1	1	Cluster-17563.48654;Cluster-17563.73088;Cluster-17563.84226;Cluster-17563.9353;Cluster-17563.13640;Cluster-17563.79693;Cluster-17563.96765;Cluster-17563.69701;Cluster-17563.13480;Cluster-17563.42075;Cluster-17563.44598;Cluster-17563.57568;Cluster-17563.74082;Cluster-17563.18963;Cluster-17563.35016;Cluster-17563.398;Cluster-15059.0;Cluster-17563.31535;Cluster-17563.10031;Cluster-17563.64631;Cluste…	K02863+K02863+K02863+K02863+K02864+K02864+K02864+K02865+K02866+K02866+K02866+K02866+K02866+K02871+K02871+K02872+K02874+K02874+K02874+K02875+K02875+K02875+K02876+K02876+K02876+K02877+K02879+K02879+K02881+K02882+K02882+K02882+K02883+K02885+K02885+K02885+K02887+K02887+K02887+K02887+K02888+K02888+K02888+K02890+K02890+K02890+K02891+K02891+K02892+K02892+K02892+K02892+K02892+K02892+K02893+K02894+K02894+…
RNA transport	ko03013	140 out of 6135 2.28198859005705%	2086 out of 69984 2.98068129858253%	0.999792	1	Cluster-17563.15427;Cluster-17563.55568;Cluster-17563.57591;Cluster-17563.68469;Cluster-29599.0;Cluster-17563.7456;Cluster-17563.98871;Cluster-17563.98880;Cluster-17563.30000;Cluster-17563.57938;Cluster-17563.103264;Cluster-17563.52153;Cluster-17563.52546;Cluster-17563.73245;Cluster-17563.80849;Cluster-43277.0;Cluster-17563.60543;Cluster-17563.79077;Cluster-17563.103246;Cluster-17563.32550;Cluste…	K00784+K00784+K00784+K00784+K00784+K01164+K01164+K01164+K02516+K02516+K03113+K03231+K03231+K03231+K03231+K03236+K03237+K03237+K03238+K03239+K03239+K03239+K03239+K03239+K03239+K03243+K03246+K03246+K03248+K03250+K03251+K03253+K03254+K03254+K03257+K03257+K03257+K03257+K03260+K03260+K03260+K03260+K03260+K03260+K03260+K03260+K03260+K03260+K03260+K03260+K03260+K03260+K03260+K03260+K03262+K03262+K03262+…
mRNA surveillance pathway	ko03015	85 out of 6135 1.38549307253464%	1309 out of 69984 1.87042752629172%	0.999041	1	Cluster-17563.50055;Cluster-17563.71496;Cluster-17563.2769;Cluster-17563.61566;Cluster-17563.61569;Cluster-39454.0;Cluster-17563.34327;Cluster-17563.59034;Cluster-17563.70320;Cluster-17563.22828;Cluster-17563.29632;Cluster-17563.34582;Cluster-17563.45664;Cluster-17563.50818;Cluster-17563.50825;Cluster-17563.57553;Cluster-17563.57555;Cluster-17563.97014;Cluster-17563.97016;Cluster-17563.96079;Clus…	K00565+K00565+K03267+K03267+K03267+K03267+K03456+K03456+K03456+K04354+K04354+K04354+K04354+K04354+K04354+K04354+K04354+K04354+K04354+K06100+K06269+K06269+K06269+K06965+K11583+K11583+K11583+K11583+K11584+K11584+K11584+K11584+K12812+K12875+K12881+K12882+K12883+K12883+K13126+K13126+K13917+K13917+K13917+K14294+K14328+K14376+K14376+K14396+K14397+K14397+K14397+K14397+K14397+K14399+K14399+K14399+K14399+…
RNA degradation	ko03018	90 out of 6135 1.46699266503667%	1160 out of 69984 1.65752171925011%	0.900726	1	Cluster-17563.23597;Cluster-17563.25035;Cluster-17563.30369;Cluster-17563.30372;Cluster-17563.35983;Cluster-17563.57817;Cluster-17563.71979;Cluster-17563.81416;Cluster-17563.82777;Cluster-17563.89176;Cluster-17563.107762;Cluster-14185.0;Cluster-2265.0;Cluster-17563.118459;Cluster-17563.134042;Cluster-17563.30958;Cluster-17563.100464;Cluster-17563.44769;Cluster-17563.66071;Cluster-17563.81386;Clus…	K00850+K00850+K00850+K00850+K00850+K00850+K00850+K00850+K00850+K00850+K00850+K00850+K00962+K00962+K01148+K01148+K01148+K01148+K01148+K01148+K03678+K03679+K03681+K03681+K04043+K04043+K04077+K04077+K04077+K04077+K04077+K04077+K04077+K04077+K04077+K04077+K04077+K04077+K04077+K04077+K04077+K04077+K04077+K04077+K08311+K10643+K12580+K12581+K12581+K12581+K12589+K12589+K12589+K12589+K12592+K12592+K12598+…
RNA polymerase	ko03020	44 out of 6135 0.71719641401793%	386 out of 69984 0.551554641060814%	0.0445245	1	Cluster-17563.27285;Cluster-17563.3639;Cluster-17563.3641;Cluster-17563.46616;Cluster-17563.52222;Cluster-17563.111574;Cluster-17563.128858;Cluster-17563.10274;Cluster-17563.103876;Cluster-17563.103877;Cluster-17563.9912;Cluster-17563.35509;Cluster-17563.52543;Cluster-17563.66247;Cluster-17563.75155;Cluster-17563.79294;Cluster-17563.84060;Cluster-17563.88016;Cluster-17563.111376;Cluster-48786.0;C…	K02999+K02999+K02999+K02999+K02999+K02999+K02999+K03002+K03002+K03002+K03002+K03006+K03006+K03006+K03006+K03006+K03006+K03006+K03006+K03006+K03006+K03010+K03011+K03011+K03011+K03011+K03012+K03013+K03013+K03014+K03014+K03015+K03015+K03018+K03018+K03020+K03022+K03024+K03024+K03024+K03024+K03026+K03027+K03040
Basal transcription factors	ko03022	26 out of 6135 0.423797881010595%	460 out of 69984 0.657293095564701%	0.995196	1	Cluster-17563.32883;Cluster-17563.60557;Cluster-17563.72945;Cluster-17563.73652;Cluster-17563.107885;Cluster-17563.127897;Cluster-17563.127898;Cluster-17563.73047;Cluster-17563.73048;Cluster-17563.39682;Cluster-17563.19824;Cluster-17563.26444;Cluster-17563.34557;Cluster-17563.60590;Cluster-17563.68083;Cluster-17563.118206;Cluster-17563.106660;Cluster-17563.62733;Cluster-17563.48397;Cluster-17563.…	K03122+K03122+K03122+K03122+K03122+K03122+K03122+K03126+K03126+K03128+K03130+K03130+K03136+K03136+K03136+K03136+K03137+K03138+K03142+K03142+K03143+K03143+K10842+K10845+K14649+K14649
Spliceosome	ko03040	260 out of 6135 4.23797881010595%	2858 out of 69984 4.08379058070416%	0.270773	1	Cluster-17563.131319;Cluster-17563.16206;Cluster-17563.2644;Cluster-17563.30393;Cluster-17563.30518;Cluster-17563.30841;Cluster-17563.34772;Cluster-17563.100749;Cluster-17563.37401;Cluster-17563.49381;Cluster-17563.50834;Cluster-17563.51085;Cluster-17563.51792;Cluster-17563.52836;Cluster-17563.52857;Cluster-17563.54896;Cluster-17563.57069;Cluster-17563.57071;Cluster-17563.57882;Cluster-17563.6196…	K03283+K03283+K03283+K03283+K03283+K03283+K03283+K03283+K03283+K03283+K03283+K03283+K03283+K03283+K03283+K03283+K03283+K03283+K03283+K03283+K03283+K03283+K03283+K03283+K03283+K03283+K03283+K03283+K03283+K03283+K03283+K03283+K03283+K03283+K03283+K03283+K03283+K03283+K03283+K03283+K03283+K03283+K03283+K03283+K03283+K03283+K03283+K03283+K03283+K03283+K03283+K03283+K03283+K03283+K03283+K03283+K11087+…
Proteasome	ko03050	67 out of 6135 1.0920945395273%	643 out of 69984 0.918781435756744%	0.0803983	1	Cluster-17563.78110;Cluster-17563.80995;Cluster-17563.78884;Cluster-17563.44707;Cluster-38706.0;Cluster-17563.13077;Cluster-17563.60857;Cluster-17563.76987;Cluster-17563.9847;Cluster-17563.9850;Cluster-17563.113469;Cluster-17563.52785;Cluster-17563.75108;Cluster-17563.85892;Cluster-17563.96348;Cluster-17563.24438;Cluster-17563.49296;Cluster-17563.102538;Cluster-17563.105653;Cluster-17563.85135;Cl…	K02725+K02725+K02731+K02732+K02732+K02736+K02736+K02736+K02737+K02737+K02737+K02738+K02739+K02739+K02739+K03029+K03029+K03029+K03029+K03029+K03029+K03029+K03029+K03029+K03030+K03031+K03032+K03033+K03033+K03033+K03033+K03035+K03037+K03038+K03061+K03061+K03061+K03061+K03061+K03061+K03062+K03063+K03063+K03063+K03063+K03063+K03063+K03063+K03063+K03063+K03063+K03063+K03063+K03063+K03063+K03063+K03063+…
Protein export	ko03060	40 out of 6135 0.6519967400163%	385 out of 69984 0.550125743026978%	0.149603	1	Cluster-17563.72797;Cluster-17563.97634;Cluster-17563.1154;Cluster-17563.134403;Cluster-17563.36599;Cluster-17563.56105;Cluster-17563.63417;Cluster-17563.67097;Cluster-17563.67100;Cluster-17563.125228;Cluster-17563.55594;Cluster-17563.14189;Cluster-17563.8975;Cluster-17563.11198;Cluster-17563.72806;Cluster-17563.83690;Cluster-17563.96226;Cluster-17563.99722;Cluster-17563.131687;Cluster-17563.7687…	K03070+K03070+K03070+K03100+K03100+K03100+K03100+K03100+K03100+K03100+K03104+K03107+K03107+K03107+K03110+K03116+K03116+K03116+K03217+K03217+K03217+K03217+K03217+K03217+K07342+K09490+K09490+K09490+K09490+K09647+K09647+K09648+K09648+K09648+K10956+K10956+K10956+K12272+K12275+K12275
Base excision repair	ko03410	36 out of 6135 0.58679706601467%	385 out of 69984 0.550125743026978%	0.367608	1	Cluster-26846.0;Cluster-17563.43932;Cluster-17563.51902;Cluster-17563.63113;Cluster-17563.8028;Cluster-17563.85006;Cluster-17563.119109;Cluster-17563.134353;Cluster-17563.42392;Cluster-17563.59885;Cluster-25759.0;Cluster-17563.9602;Cluster-27097.0;Cluster-17563.25980;Cluster-17563.39184;Cluster-17563.39185;Cluster-14823.0;Cluster-48883.0;Cluster-17563.87353;Cluster-31018.0;Cluster-17563.62111;Clu…	K01142+K01246+K01247+K01247+K01247+K01247+K01247+K02335+K02335+K02335+K02335+K03504+K03504+K03648+K03660+K03660+K03660+K04802+K10563+K10772+K10773+K10773+K10773+K10773+K10773+K10773+K10773+K10798+K10798+K10798+K10798+K10802+K10802+K10802+K24070+K24070
Nucleotide excision repair	ko03420	99 out of 6135 1.61369193154034%	923 out of 69984 1.31887288523091%	0.0219712	1	Cluster-17563.134353;Cluster-17563.42392;Cluster-17563.59885;Cluster-25759.0;Cluster-17563.48397;Cluster-17563.55857;Cluster-17563.19460;Cluster-17563.99739;Cluster-17563.9602;Cluster-27097.0;Cluster-26376.0;Cluster-48883.0;Cluster-17563.132322;Cluster-15724.1;Cluster-17563.16732;Cluster-17563.20057;Cluster-17563.22387;Cluster-17563.24707;Cluster-17563.26515;Cluster-17563.28207;Cluster-17563.2821…	K02335+K02335+K02335+K02335+K03142+K03142+K03143+K03143+K03504+K03504+K03657+K04802+K07466+K07466+K07466+K07466+K07466+K07466+K07466+K07466+K07466+K07466+K07466+K07466+K07466+K07466+K07466+K07466+K07466+K07466+K07466+K07466+K07466+K07466+K07466+K07466+K07466+K07466+K07466+K07466+K07466+K07466+K07466+K07466+K07466+K07466+K07466+K07466+K07466+K07466+K07466+K07466+K07466+K07466+K07466+K07466+K07466+…
Mismatch repair	ko03430	77 out of 6135 1.25509372453138%	712 out of 69984 1.01737540009145%	0.0332164	1	Cluster-17563.104997;Cluster-17563.104999;Cluster-17563.9602;Cluster-27097.0;Cluster-26376.0;Cluster-48883.0;Cluster-17563.63421;Cluster-17563.77536;Cluster-17563.77538;Cluster-17563.84696;Cluster-46602.0;Cluster-610.0;Cluster-17563.132322;Cluster-15724.1;Cluster-17563.16732;Cluster-17563.20057;Cluster-17563.22387;Cluster-17563.24707;Cluster-17563.26515;Cluster-17563.28207;Cluster-17563.2821;Clus…	K03111+K03111+K03504+K03504+K03657+K04802+K07456+K07456+K07456+K07456+K07456+K07456+K07466+K07466+K07466+K07466+K07466+K07466+K07466+K07466+K07466+K07466+K07466+K07466+K07466+K07466+K07466+K07466+K07466+K07466+K07466+K07466+K07466+K07466+K07466+K07466+K07466+K07466+K07466+K07466+K07466+K07466+K07466+K07466+K07466+K07466+K07466+K07466+K07466+K07466+K07466+K07466+K07466+K07466+K07466+K07466+K07466+…
Homologous recombination	ko03440	117 out of 6135 1.90709046454768%	946 out of 69984 1.35173754000914%	0.000107812	0.0146624	Cluster-17563.134353;Cluster-17563.42392;Cluster-17563.59885;Cluster-25759.0;Cluster-17563.104997;Cluster-17563.104999;Cluster-17563.9602;Cluster-27097.0;Cluster-17563.2715;Cluster-20766.0;Cluster-17563.105737;Cluster-17563.30053;Cluster-17563.35188;Cluster-17563.101334;Cluster-17563.54604;Cluster-17563.62900;Cluster-17563.77021;Cluster-17563.90148;Cluster-17563.96506;Cluster-17563.96528;Cluster-…	K02335+K02335+K02335+K02335+K03111+K03111+K03504+K03504+K03553+K03553+K03655+K04728+K04728+K04728+K04728+K04728+K04728+K04728+K04728+K04728+K04728+K04728+K04728+K04728+K07466+K07466+K07466+K07466+K07466+K07466+K07466+K07466+K07466+K07466+K07466+K07466+K07466+K07466+K07466+K07466+K07466+K07466+K07466+K07466+K07466+K07466+K07466+K07466+K07466+K07466+K07466+K07466+K07466+K07466+K07466+K07466+K07466+…
Non-homologous end-joining	ko03450	7 out of 6135 0.114099429502852%	87 out of 69984 0.124314128943759%	0.649071	1	Cluster-17563.41965;Cluster-17563.93882;Cluster-17563.99828;Cluster-17563.15043;Cluster-17563.67059;Cluster-17563.81620;Cluster-17563.51836	K10777+K10777+K10777+K10866+K10866+K10866+K10885
Phosphatidylinositol signaling system	ko04070	64 out of 6135 1.04319478402608%	812 out of 69984 1.16026520347508%	0.830932	1	Cluster-17563.58075;Cluster-17563.59207;Cluster-17563.77605;Cluster-17563.79173;Cluster-27669.0;Cluster-43769.0;Cluster-43769.1;Cluster-17563.113210;Cluster-17563.135348;Cluster-17563.80927;Cluster-18638.0;Cluster-37834.0;Cluster-17563.97280;Cluster-17563.355;Cluster-17563.60895;Cluster-34857.0;Cluster-42054.0;Cluster-17563.11960;Cluster-26198.0;Cluster-17563.16965;Cluster-17563.54807;Cluster-175…	K00889+K00889+K00889+K00889+K00889+K00889+K00889+K00889+K00901+K00901+K00901+K00901+K00914+K00921+K00921+K00921+K00921+K00921+K00981+K01092+K01092+K01092+K01092+K01099+K01099+K02183+K02183+K02183+K02183+K02183+K02183+K02183+K02183+K02183+K02183+K05857+K05857+K05857+K10572+K10572+K13024+K13024+K13024+K18081+K18081+K18081+K18081+K18081+K18081+K18081+K18081+K18081+K18081+K20279+K20279+K20279+K20279+…
Plant hormone signal transduction	ko04075	359 out of 6135 5.85167074164629%	2864 out of 69984 4.09236396890718%	8.68949e-12	1.18177e-09	Cluster-17563.48862;Cluster-17563.78564;Cluster-17563.85298;Cluster-17563.54233;Cluster-17563.65445;Cluster-17563.65572;Cluster-17563.65573;Cluster-41794.0;Cluster-17563.132126;Cluster-17563.132128;Cluster-17563.134674;Cluster-17563.15046;Cluster-17563.19889;Cluster-17563.2175;Cluster-17563.2176;Cluster-17563.29891;Cluster-17563.31484;Cluster-17563.100397;Cluster-17563.35957;Cluster-17563.3602;Cl…	K12126+K12126+K12126+K13413+K13413+K13413+K13413+K13413+K13415+K13415+K13415+K13415+K13415+K13415+K13415+K13415+K13415+K13415+K13415+K13415+K13415+K13415+K13415+K13415+K13415+K13415+K13415+K13415+K13415+K13415+K13415+K13415+K13415+K13415+K13415+K13415+K13415+K13415+K13415+K13415+K13415+K13415+K13415+K13415+K13415+K13415+K13415+K13415+K13415+K13415+K13415+K13415+K13415+K13415+K13415+K13415+K13415+…
Ubiquitin mediated proteolysis	ko04120	129 out of 6135 2.10268948655257%	1668 out of 69984 2.38340192043896%	0.941837	1	Cluster-17563.62836;Cluster-17563.63053;Cluster-17563.67566;Cluster-17563.73353;Cluster-17563.77670;Cluster-17563.93689;Cluster-17563.273;Cluster-17563.35694;Cluster-17563.52829;Cluster-17563.8749;Cluster-17563.65428;Cluster-17563.31388;Cluster-17563.33327;Cluster-17563.38600;Cluster-17563.63957;Cluster-12448.0;Cluster-17563.43855;Cluster-17563.55247;Cluster-22825.0;Cluster-35557.1;Cluster-17563.…	K02927+K02927+K02977+K02977+K02977+K02977+K03094+K03094+K03094+K03094+K03178+K03347+K03347+K03347+K03347+K03347+K03354+K03354+K03354+K03354+K03355+K03358+K03363+K03364+K03364+K03875+K03875+K03875+K04506+K04506+K04506+K04506+K04506+K04506+K04506+K04506+K04506+K04506+K04649+K06688+K06689+K06689+K06689+K08770+K09561+K09561+K09561+K10140+K10140+K10143+K10143+K10143+K10143+K10143+K10143+K10143+K10143+…
Sulfur relay system	ko04122	13 out of 6135 0.211898940505297%	85 out of 69984 0.121456332876086%	0.0336553	1	Cluster-17563.18636;Cluster-17563.38146;Cluster-17563.76669;Cluster-17563.81842;Cluster-17563.130747;Cluster-17563.2375;Cluster-17563.35286;Cluster-17563.106432;Cluster-17563.126611;Cluster-14628.0;Cluster-15979.0;Cluster-38046.0;Cluster-17563.85345	K04487+K04487+K04487+K04487+K11996+K11996+K11996+K11996+K11996+K11996+K14168+K14168+K21232
SNARE interactions in vesicular transport	ko04130	34 out of 6135 0.554197229013855%	382 out of 69984 0.545839048925469%	0.489201	1	Cluster-17563.133039;Cluster-17563.1530;Cluster-17563.40314;Cluster-17563.41159;Cluster-17563.45493;Cluster-17563.47389;Cluster-17563.56024;Cluster-17563.56563;Cluster-17563.67136;Cluster-17563.72189;Cluster-17563.72873;Cluster-17563.105768;Cluster-17563.83259;Cluster-17563.90410;Cluster-17563.98792;Cluster-17563.124140;Cluster-37882.0;Cluster-17563.48954;Cluster-17563.116686;Cluster-17563.100959…	K08486+K08486+K08486+K08486+K08486+K08486+K08486+K08486+K08486+K08486+K08486+K08486+K08486+K08486+K08486+K08486+K08492+K08493+K08493+K08495+K08495+K08495+K08498+K08504+K08504+K08505+K08506+K08506+K08506+K08506+K08507+K08517+K08517+K08517
Autophagy - other	ko04136	36 out of 6135 0.58679706601467%	560 out of 69984 0.800182898948331%	0.982727	1	Cluster-17563.97280;Cluster-17563.30146;Cluster-17390.1;Cluster-17563.62669;Cluster-17563.36536;Cluster-17563.6749;Cluster-17563.88570;Cluster-17563.32639;Cluster-17563.93679;Cluster-17563.12915;Cluster-17563.93572;Cluster-17563.52169;Cluster-17563.32045;Cluster-17563.35676;Cluster-17563.37684;Cluster-17563.49642;Cluster-17563.50482;Cluster-17563.56009;Cluster-17563.59221;Cluster-17563.62499;Clus…	K00914+K07204+K08266+K08266+K08269+K08269+K08269+K08330+K08330+K08330+K08331+K08333+K08337+K08341+K08341+K08341+K08341+K08341+K08341+K08341+K08341+K08341+K08341+K08341+K08341+K08341+K08341+K08342+K17890+K17906+K17907+K17908+K17908+K17908+K17908+K19730
Protein processing in endoplasmic reticulum	ko04141	298 out of 6135 4.85737571312143%	2477 out of 69984 3.53938042981253%	1.42004e-08	1.93125e-06	Cluster-17563.31105;Cluster-17563.51394;Cluster-17563.103235;Cluster-17563.118241;Cluster-17563.21572;Cluster-17563.35959;Cluster-17563.43478;Cluster-17563.45562;Cluster-17563.5358;Cluster-17563.53818;Cluster-17563.5518;Cluster-17563.91953;Cluster-17563.109101;Cluster-22649.0;Cluster-27306.0;Cluster-17563.11656;Cluster-17563.15320;Cluster-16557.0;Cluster-17563.31226;Cluster-17563.43024;Cluster-17…	K01228+K01228+K01228+K01228+K01230+K01230+K01230+K01230+K01230+K01230+K01230+K01230+K01230+K01230+K01230+K01230+K01456+K01456+K01456+K01456+K01456+K01456+K01456+K01456+K01456+K01456+K01456+K01456+K01456+K01456+K01456+K01456+K01456+K01456+K01456+K01456+K01456+K01456+K01456+K01456+K01456+K01456+K01456+K01456+K01456+K03094+K03094+K03094+K03094+K03237+K03237+K03283+K03283+K03283+K03283+K03283+K03283+…
Endocytosis	ko04144	223 out of 6135 3.63488182559087%	2428 out of 69984 3.46936442615455%	0.238895	1	Cluster-17563.58075;Cluster-17563.59207;Cluster-17563.77605;Cluster-17563.79173;Cluster-27669.0;Cluster-43769.0;Cluster-43769.1;Cluster-17563.113210;Cluster-17563.411;Cluster-17563.50998;Cluster-17563.65900;Cluster-17563.90193;Cluster-17563.97240;Cluster-17563.11736;Cluster-17563.19713;Cluster-16894.0;Cluster-17563.36963;Cluster-17563.101388;Cluster-17563.52042;Cluster-17563.53032;Cluster-17563.5…	K00889+K00889+K00889+K00889+K00889+K00889+K00889+K00889+K01115+K01115+K01115+K01115+K01115+K01115+K01528+K01528+K01528+K01528+K01528+K01528+K01528+K01528+K01528+K01528+K01528+K01528+K01528+K01528+K01528+K01528+K03283+K03283+K03283+K03283+K03283+K03283+K03283+K03283+K03283+K03283+K03283+K03283+K03283+K03283+K03283+K03283+K03283+K03283+K03283+K03283+K03283+K03283+K03283+K03283+K03283+K03283+K03283+…
Phagosome	ko04145	64 out of 6135 1.04319478402608%	860 out of 69984 1.22885230909922%	0.928138	1	Cluster-17563.97280;Cluster-17563.355;Cluster-17563.60895;Cluster-34857.0;Cluster-42054.0;Cluster-17563.11960;Cluster-17563.66402;Cluster-17563.74439;Cluster-17563.76515;Cluster-17563.82598;Cluster-17563.86989;Cluster-17563.73601;Cluster-17563.97179;Cluster-17563.64553;Cluster-17563.79565;Cluster-17563.95420;Cluster-17563.95421;Cluster-17563.38369;Cluster-17563.96829;Cluster-17563.74320;Cluster-1…	K00914+K00921+K00921+K00921+K00921+K00921+K02145+K02145+K02145+K02145+K02145+K02148+K02149+K02153+K02153+K02153+K02153+K02154+K02154+K02155+K02155+K04392+K04392+K04392+K07342+K07374+K07374+K07374+K07374+K07374+K07374+K07374+K07374+K07374+K07374+K07374+K07374+K07374+K07375+K07375+K07375+K07889+K07889+K07897+K07897+K07897+K07897+K07897+K07897+K08054+K08054+K08054+K08057+K08057+K08057+K08492+K08517+…
Peroxisome	ko04146	118 out of 6135 1.92339038304808%	1321 out of 69984 1.88757430269776%	0.428844	1	Cluster-17563.65979;Cluster-17563.104838;Cluster-17563.521;Cluster-17563.56833;Cluster-17563.80887;Cluster-17563.98997;Cluster-18350.0;Cluster-17563.70468;Cluster-17563.70469;Cluster-17563.27481;Cluster-17563.48488;Cluster-17563.55052;Cluster-17563.66155;Cluster-17563.79643;Cluster-17563.82800;Cluster-17563.96763;Cluster-45144.0;Cluster-17563.28041;Cluster-17563.45582;Cluster-17563.104530;Cluster…	K00031+K00031+K00232+K00232+K00232+K00232+K00232+K00306+K00306+K00830+K00830+K00830+K00830+K00830+K00869+K00869+K00869+K01640+K01640+K01640+K01640+K01897+K01897+K01897+K01897+K01897+K01897+K01897+K01897+K01897+K01897+K01897+K01897+K01897+K01897+K01897+K01897+K01897+K01897+K01897+K01897+K01897+K01897+K01897+K01897+K01897+K01897+K03426+K03781+K03781+K03781+K03781+K03781+K04564+K04564+K04564+K04564+…
Plant-pathogen interaction	ko04626	688 out of 6135 11.2143439282804%	5319 out of 69984 7.60030864197531%	1.76688e-10	2.40296e-08	Cluster-17563.21003;Cluster-17563.57809;Cluster-17563.76181;Cluster-17563.76182;Cluster-17563.63024;Cluster-17563.68414;Cluster-17563.72367;Cluster-17563.45217;Cluster-17563.51879;Cluster-17563.68070;Cluster-17563.68075;Cluster-17563.68643;Cluster-17563.73243;Cluster-17563.85453;Cluster-20434.0;Cluster-26758.0;Cluster-17563.112789;Cluster-17563.52387;Cluster-17563.52390;Cluster-17563.52777;Cluste…	K00864+K00864+K00864+K00864+K01373+K01373+K01373+K02183+K02183+K02183+K02183+K02183+K02183+K02183+K02183+K02183+K02183+K02358+K02358+K02358+K02358+K02358+K02358+K04079+K04079+K04079+K04079+K04079+K04079+K04079+K04079+K04079+K04079+K04079+K04079+K04368+K05391+K05391+K05391+K05391+K05391+K05391+K05391+K05391+K05391+K05391+K05391+K05391+K05391+K05391+K05391+K05391+K05391+K05391+K05391+K05391+K05391+…
Circadian rhythm - plant	ko04712	77 out of 6135 1.25509372453138%	655 out of 69984 0.93592821216278%	0.00537234	0.730638	Cluster-17563.14294;Cluster-17563.44398;Cluster-17563.68284;Cluster-17563.81696;Cluster-11683.0;Cluster-9015.0;Cluster-17563.14869;Cluster-17563.62860;Cluster-17563.69974;Cluster-17563.95505;Cluster-17563.112019;Cluster-17563.122098;Cluster-17563.35489;Cluster-17563.56712;Cluster-17563.56713;Cluster-17563.57885;Cluster-17563.67656;Cluster-17563.67657;Cluster-17563.82538;Cluster-33592.0;Cluster-17…	K00660+K00660+K00660+K00660+K00660+K00660+K03097+K03097+K03097+K03097+K03097+K03097+K10143+K10143+K10143+K10143+K10143+K10143+K10143+K10143+K12118+K12118+K12118+K12120+K12120+K12121+K12124+K12125+K12125+K12125+K12126+K12126+K12126+K12127+K12127+K12129+K12129+K12129+K12129+K12129+K12129+K12129+K12129+K12130+K12133+K12133+K12133+K12133+K12135+K12135+K12135+K12135+K12135+K16221+K16221+K16221+K16221+…
