# Supplementary material for: Transcriptomic and Metabolomic Analyses Providing Insights into the Coloring Mechanism of Docynia delavayi
Source: Foods. 2022 Sep 18;11(18):2899. doi: 10.3390/foods11182899 (PMC9498648; doi:10.3390/foods11182899)
Supplement: Supplementary file 1 [file foods-11-02899-s001.zip › Table S6.xlsx]

## Sheet: Sheet1
Table S6 Transcription factors differentially expressed in the mature pericarp of Docynia delavayi
Comparison group	Gene family	Number of DEGs	Up-regulated DEGs	Down-regulated DEGs	Description	Biological functions
GP vs. RP	MYB	79	37	42	MYB TFs	Cell development and anthocyanin pathway
	bHLH	29	11	18	Basic helix-loop-helix protein	Plant development and substance metabolism
	bZIP	29	18	11	basic region-leucine zipper	Signal transduction and stress response
	AP2/ERF	57	17	40	Ethylene-responsive TF	Plant development and stress response
	WRKY	36	16	20	WRKY DNA-binding protein	Defense responses and plant development
	HSF	12	5	7	Ethylene-responsive TF	Plant growth, development and stress response
	NAC	34	20	14	NAC domain protein	Plant growth and stress response
	MADS	7	3	4	MADS-box TFs	Fruit development and ripening
	HB-HD-ZIP	19	12	7	Homeobox-leucine zipper protein	Photomorphogenesis and fruit ripening
	Other TFs	507	188	319
YP vs. GP	MYB	116	57	59	MYB TFs	Cell development and anthocyanin pathway
	bHLH	40	21	19	Basic helix-loop-helix protein	Plant development and substance metabolism
	bZIP	41	10	31	basic region-leucine zipper	Signal transduction and stress response
	AP2/ERF	69	40	29	Ethylene-responsive TF	Plant development and stress response
	WRKY	59	27	32	WRKY DNA-binding protein	Defense responses and plant development
	HSF	24	4	20	Ethylene-responsive TF	Plant growth, development and stress response
	NAC	62	25	37	NAC domain protein	Plant growth and stress response
	MADS	16	11	5	MADS-box TFs	Fruit development and ripening
	HB-HD-ZIP	28	10	18	Homeobox-leucine zipper protein	Photomorphogenesis and fruit ripening
	Other TFs	685	358	327
YP vs. RP	MYB	112	57	55	MYB TFs	Cell development and anthocyanin pathway
	bHLH	55	26	29	Basic helix-loop-helix protein	Plant development and substance metabolism
	bZIP	51	23	28	basic region-leucine zipper	Signal transduction and stress response
	AP2/ERF	61	26	35	Ethylene-responsive TF	Plant development and stress response
	WRKY	42	17	25	WRKY DNA-binding protein	Defense responses and plant development
	HSF	19	4	15	Ethylene-responsive TF	Plant growth, development and stress response
	NAC	64	25	21	NAC domain protein	Plant growth and stress response
	MADS	16	6	10	MADS-box TFs	Fruit development and ripening
	HB-HD-ZIP	22	11	11	Homeobox-leucine zipper protein	Photomorphogenesis and fruit ripening
	Other TFs	789	424	365
